# Supplementary material for: Customized self-assembled molecules: rim adjustable coronal polygons with multiple-folds symmetry
Source: Royal Society of Chemistry journal article supplement (doi:10.1039/d1qo01316e), 2021-01-01
Supplement: d1qo01316e1.pdf [file d1qo01316e1.pdf]

## Supporting Information

### Customized Self-assembled Molecules: Rim Adjustable

### Coronal Polygons with Multiple-Folds Symmetry

Mingzhao Chen,<sup>a‡</sup> Jia-nan Cao,<sup>b‡</sup> Suqing Li,<sup>b</sup> Die Liu,<sup>\*a</sup> Jun Wang,<sup>b</sup> He Zhao,<sup>b</sup> Guotao Wang,<sup>b</sup> Tun Wu,<sup>a</sup> Zhilong Jiang,<sup>a</sup> Pingshan Wang<sup>\*ab</sup>

---

[a] Institute of Environmental Research at Greater Bay Area; Key Laboratory for Water Quality and Conservation of the Pearl River Delta, Ministry of Education, Guangzhou Key Laboratory for Clean Energy and Materials, Guangzhou University, Guangzhou 510006, China

[b] Department of Organic and Polymer Chemistry; Hunan Key Laboratory of Micro & Nano Materials Interface Science; College of Chemistry and Chemical Engineering, Central South University, Changsha 410083, China

### Table of Content

|                                                                                                          |    |
|----------------------------------------------------------------------------------------------------------|----|
| 1. General Procedures .....                                                                              | 1  |
| 2. Schematic illustration of a mixture formed from 120° bis-terpyridine ligand <b>L</b> .....            | 2  |
| 3. Synthesis of the MOL ligand <b>LA</b> and tetragonum wreath <b>Fe<sub>8</sub>LA<sub>4</sub></b> ..... | 4  |
| 4. Synthesis of the MOL ligand <b>LB</b> and pentagon wreath <b>Fe<sub>10</sub>LB<sub>5</sub></b> .....  | 13 |
| 5. Synthesis of the MOL ligand <b>LC</b> and hexagon wreath <b>Fe<sub>12</sub>LC<sub>6</sub></b> .....   | 21 |
| 6. <sup>1</sup> H NMR, <sup>13</sup> C NMR, COSY and NOESY spectra of other compounds .....              | 28 |
| 7. ESI-MS spectra data of ligands and complexes .....                                                    | 47 |
| 8. References .....                                                                                      | 52 |

## 1. General Procedures

All starting materials were purchased from Aldrich and Alfa Aesar, and used without further purification. Organic ligand **L** and 4'-Boronatopenyl[2,2':6',2'']terpyridine were synthesized according to the reported methods<sup>S1-2</sup>. Column chromatography was conducted using basic Al<sub>2</sub>O<sub>3</sub> (Sinopharm Chemical Reagents Co. Ltd, 200-300 mesh) or SiO<sub>2</sub> (Qingdao Haiyang Chemical Co., Ltd, 200-300 mesh) and the separated products were confirmed by NMR spectra using a Bruker Avance 400-MHz or 500-MHz NMR spectrometers in CDCl<sub>3</sub>, MeOD, and CD<sub>3</sub>CN with a TMS standard. Transmission electron microscopy (TEM) was conducted on JEOL 2010. Electro-spray ionization (ESI) mass spectra were recorded with a Bruker microOTOF-QII or a Waters Synapt HDMS G2 instrument, using solutions of 0.01 mg/mL in CHCl<sub>3</sub>/MeCN (1:3, v/v) for ligands and 0.2 mg/mL in MeCN or MeCN/MeOH (3:1, v/v) for complexes.

**ESI and TWIM MS.** ESI mass spectrometry and traveling wave ion mobility (TWIM) experiments were conducted on a Waters Synapt HDMS G2 instrument with a LockSpray ESI source, using the following parameters: ESI capillary voltage, 1.3-3.0 kV; sample cone voltage, 20-25 V; extraction cone voltage, 1.1-3 V; desolvation gas flow, 800 L/h (N<sub>2</sub>); trap collision energy (CE), 4 V; transfer CE, 0 V; trap gas flow, 2.0 mL/min (Ar); source temperature, 30 °C; and desolvation temperature, 30 °C. All samples were dissolved in CH<sub>3</sub>CN or CH<sub>3</sub>CN/CH<sub>3</sub>NO<sub>2</sub> (1:1, v/v) and then infused into the -100, KD Scientific). For TWIM experiments, the helium cell gas flow was held at 180.0 mL/min and the ion mobility cell gas flow was held at 90.0 mL/min (N<sub>2</sub>). The TWIM DC traveling wave velocity and height were set as 683 m/s and 26.3 V, respectively. Data were collected and analyzed by using MassLynx 4.1 and DriftScope 2.4 (Waters).

**Molecular Modeling.** Calculations were proceeded with Geometry Optimization and followed by Anneal in Forcite module of Materials Studio version 7.0 program (Accelrys Software, Inc.), the counterions were omitted.

**TEM.** The samples were dissolved in MeCN at a concentration of  $\sim 10^{-7}$  M. The solutions were dropped cast on to a carbon-coated Cu grid (300-400 mesh) and the extra solution was blotted by filter paper to avoid aggregation. The TEM images of the samples were taken with a JEOL 2010 Transmission Electron Microscope.

## 2. Schematic illustration of a mixture formed from 120° bis-terpyridine ligand **L**

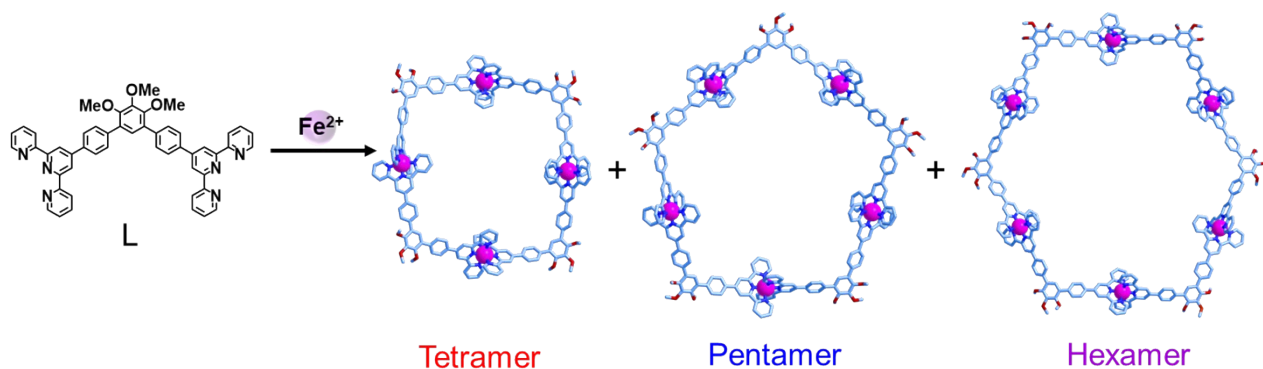

**Scheme 1:** Schematic illustration of a mixture formed from 120° bis-terpyridine ligand **L**<sup>S1</sup>

Organic ligand **L** (3.2 mg, 4.1  $\mu\text{mol}$ ), and  $\text{FeCl}_2 \cdot 4\text{H}_2\text{O}$  (0.8 mg, 4.1  $\mu\text{mol}$ ) was added in a 50 mL flask, then a solvent mixture of  $\text{CH}_3\text{CN}/\text{MeOH}$  (20 mL, V:V, 2:1) was added. The mixture was refluxed for 12 h, after cooled to ambient temperature, excess bistrifluoromethanesulfonimide lithium salt ( $\text{LiNTf}_2$ ) in MeOH was added to get a violet precipitate, which was filtered and washed with  $\text{H}_2\text{O}$  and MeOH to generate a purplish solid: 5.4 mg (94.7%).

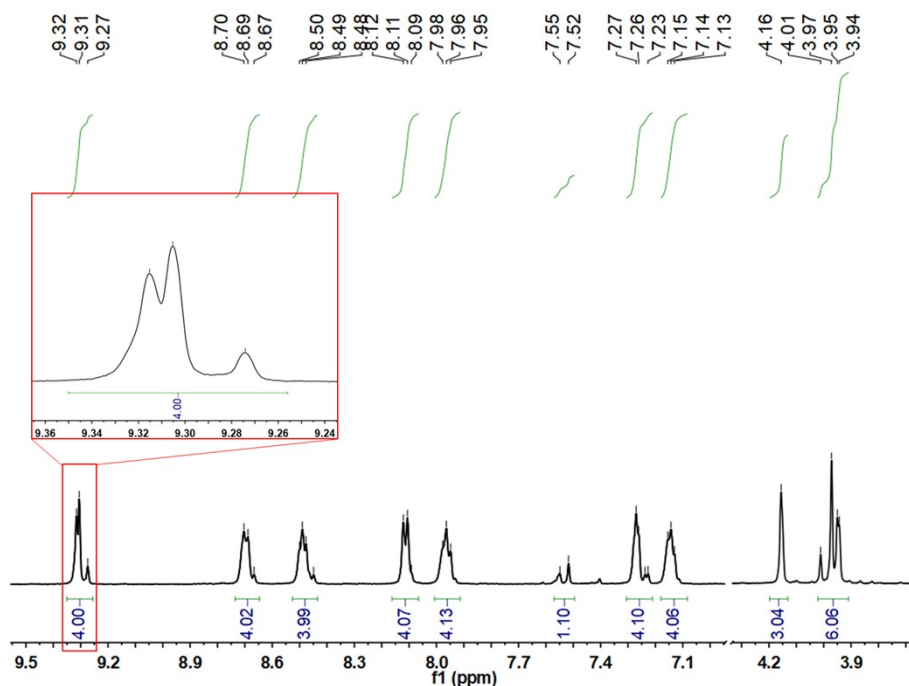

**Figure S1:**  $^1\text{H}$  NMR spectrum (500 MHz) of resultant mixture from ligand **L** in  $\text{CD}_3\text{CN}$ .

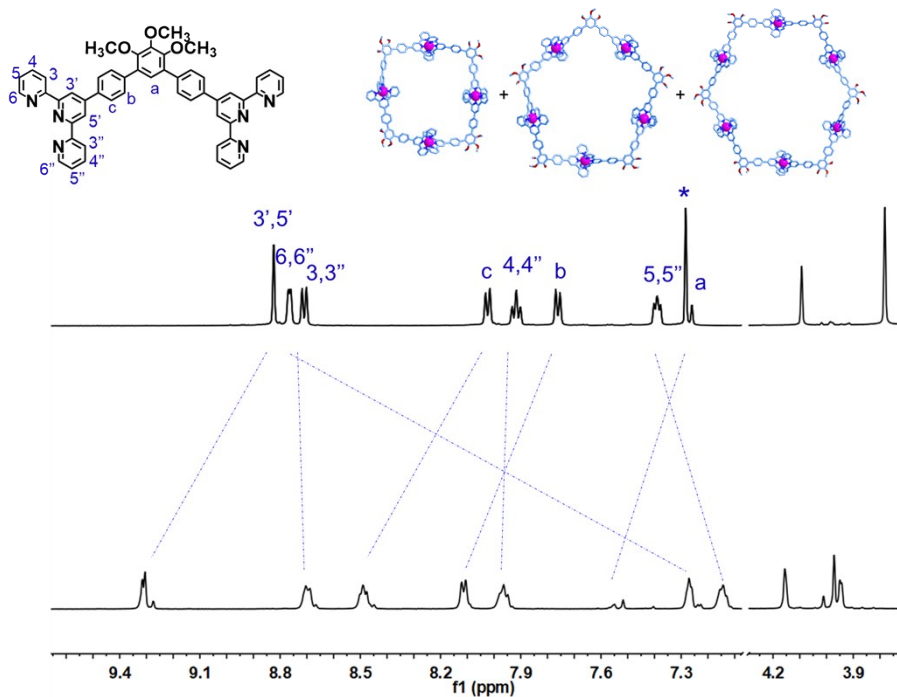

**Figure S2:** Comparison of the  $^1\text{H}$  NMR spectra (500 MHz) of ligand **L** in  $\text{CDCl}_3$  and the resultant mixture in  $\text{CD}_3\text{CN}$ .

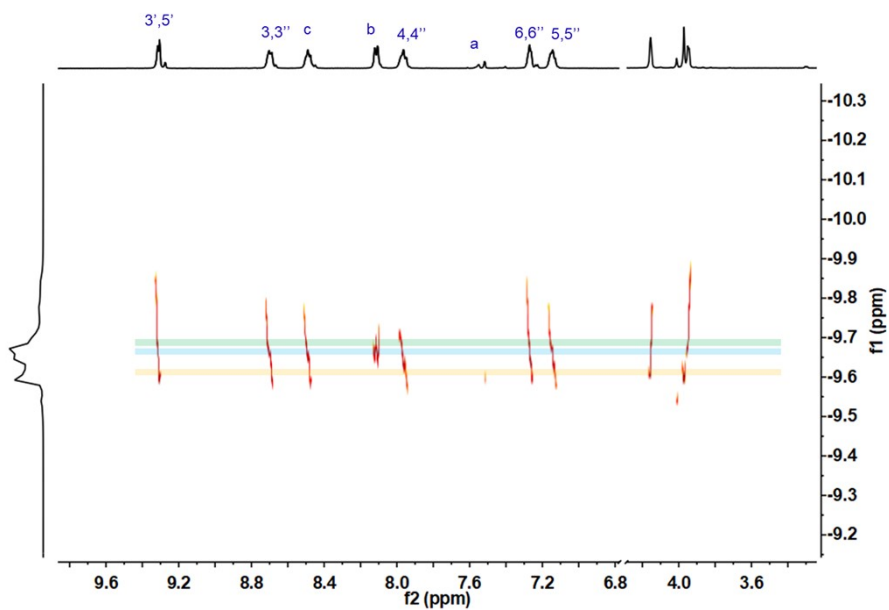

**Figure S3:** DOSY spectrum (500 MHz) of the resultant mixture in  $\text{CD}_3\text{CN}$ .

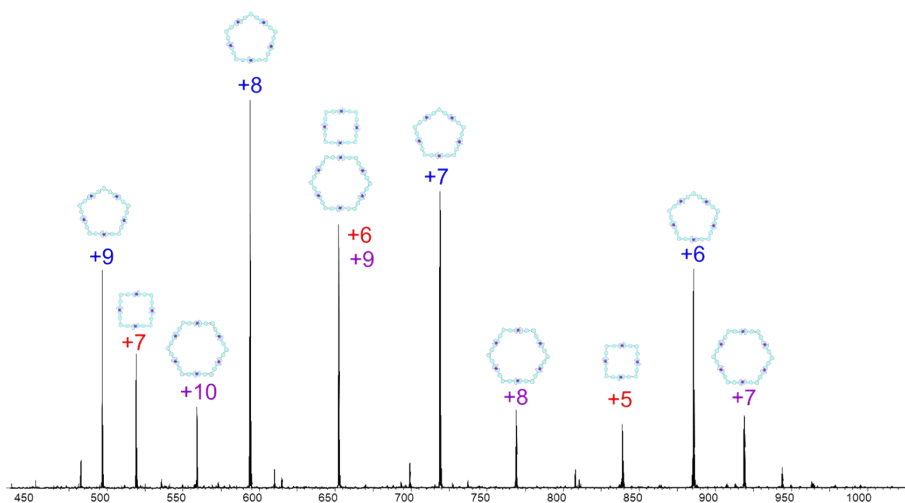

**Figure S4:** ESI-MS of resultant mixture from ligand L.

### 3. Synthesis of the MOL ligand LA and tetragonum wreath $\text{Fe}_8\text{LA}_4$

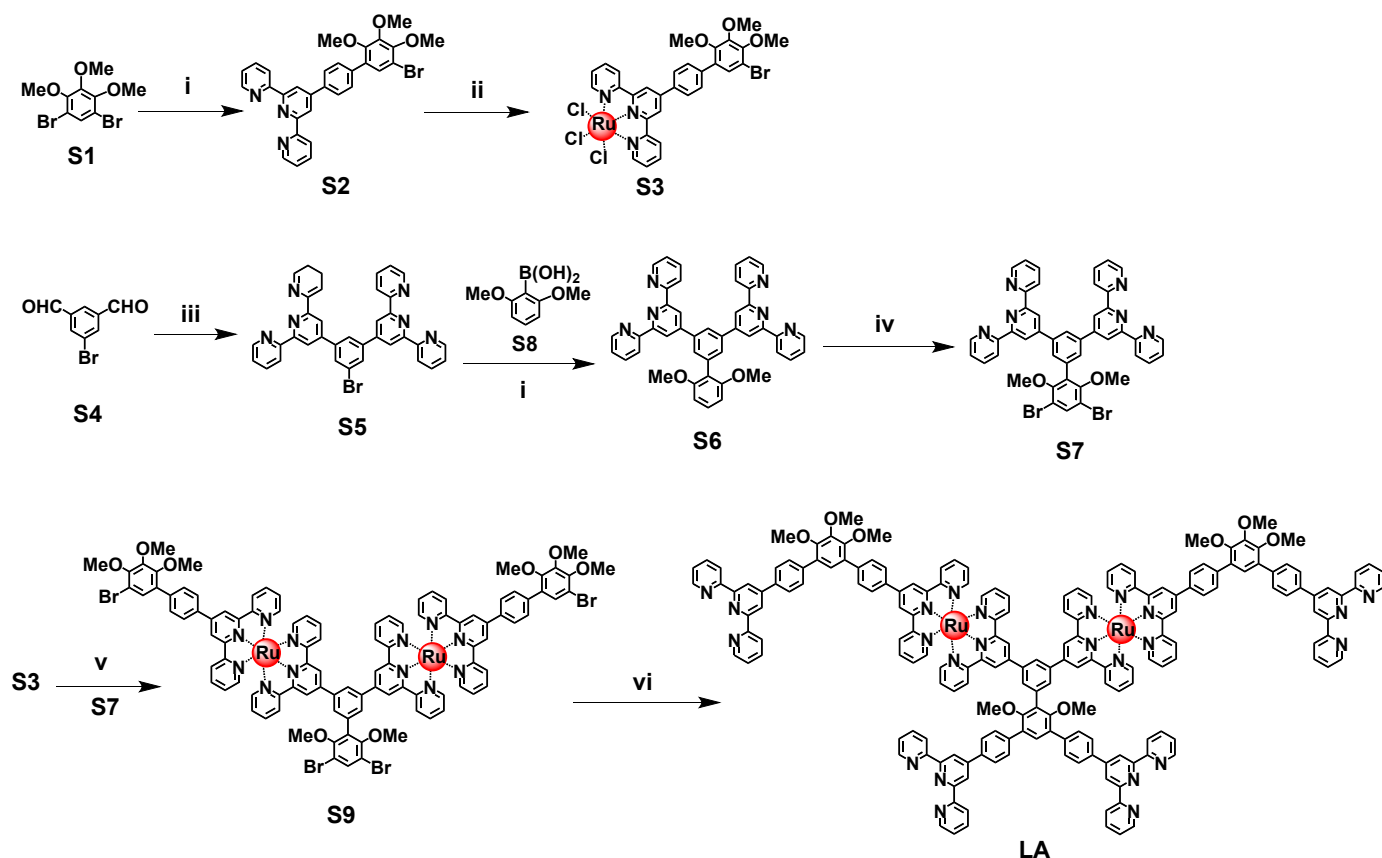

**Scheme 2:** Synthesis of MOL ligand A. Reagent and conditions: (i) Tpy-B(OH)<sub>2</sub>, Pd(PPh<sub>3</sub>)<sub>4</sub>, THF, NaOH, reflux ; (ii) RuCl<sub>3</sub>·3H<sub>2</sub>O, EtOH, reflux; (iii) 2-acetylpyridine, KOH, EtOH, NH<sub>3</sub>·H<sub>2</sub>O, reflux; (iv) Br<sub>2</sub>, CHCl<sub>3</sub>, reflux; (v) N-ethylmorpholine, CH<sub>3</sub>OH/CHCl<sub>3</sub> (V:V, 1:3), reflux; (vi) Tpy-B(OH)<sub>2</sub>, Pd(PPh<sub>3</sub>)<sub>4</sub>, CH<sub>3</sub>CN/CH<sub>3</sub>OH(V:V, 2:1), K<sub>2</sub>CO<sub>3</sub>, reflux.

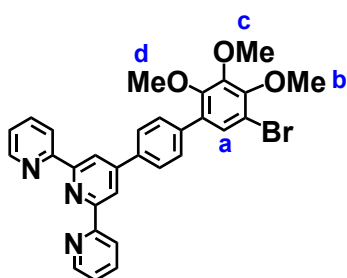

**Compound S2:** 1,2,3-trimethoxy-4,6-dibromobenzene **S1** (3.3 g, 10 mmol) and 4'-Boronatopenyl[2,2':6',2'']terpyridine (3.5 g, 10 mmol) was added to a 500 mL flask, then THF (250 mL) and NaOH (1.2 g, 30 mmol, in 30 mL water) was added. The system was degassed for 10 min, and Pd(PPh<sub>3</sub>)<sub>4</sub> (0.46 g, 0.4 mmol) as the catalyst was added. The mixture was stirred at 85 °C under nitrogen for 12 h, after cooled to ambient temperature, then concentrated in vacuo followed by column chromatography (Al<sub>2</sub>O<sub>3</sub>), eluting with the mixture of petroleum ether and CH<sub>2</sub>Cl<sub>2</sub> to pure the product, as white solid: 3.32 g, 60%. <sup>1</sup>H NMR (400 MHz, CDCl<sub>3</sub>) δ 8.79(s, 2H, tpy-*H*<sup>3',5'</sup>), 8.75-8.74 (d, *J* = 4 Hz, 2H, tpy-*H*<sup>6,6''</sup>), 8.71-8.69 (d, *J* = 8 Hz, 4H, tpy-*H*<sup>3,3''</sup>), 7.98-7.96(d, *J* = 8 Hz, 2H, tpy-*H*<sup>5</sup>), 7.92-7.88 (t, *J* = 16 Hz, 2H, tpy-*H*<sup>4,4''</sup>), 7.65-7.63 (d, *J* = 8 Hz, 2H, tpy-*H*<sup>h</sup>), 7.39-7.36 (m, 3H, tpy-*H*<sup>5,5''</sup>, Ph-*H*<sup>a</sup>), 4.00 (s, 3H, *H*<sup>c</sup>), 3.97 (s, 3H, *H*<sup>b</sup>), 3.68 (s, 3H, *H*<sup>d</sup>).

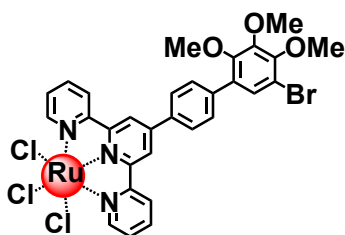

**Compound S3:** To a solution of **S2** (200.0 mg, 0.4 mmol) and RuCl<sub>3</sub>•3H<sub>2</sub>O (105.0 mg, 0.4 mmol) in EtOH (50 mL). The mixture was stirred at 75 °C for 24 h. After cooling to ambient temperature, the precipitates were filtered and washed with MeOH to afford **S3**: 250.0 mg, 90.0%.

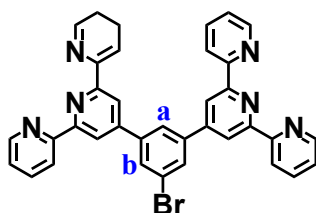

**Compound S5:** To a solution of NaOH powder (240.0 mg, 6 mmol) in EtOH (200 mL), 3, 5-diformylbromobenzene **S4** (3.54 g, 2 mmol) and 2-acetylpyridine (5.14 g, 4.8 mmol) was added. After stirring at room temperature for 24 h, aqueous NH<sub>3</sub>•H<sub>2</sub>O (28%, 150 mL) was added, the resulting mixture was refluxed for 20 h. After cooling to room temperature, the solid was collected by suction filtration and was washed with CH<sub>3</sub>OH to give the product as a white

solid: 9.97 g, 85.0%).  $^1\text{H}$  NMR (400 MHz,  $\text{CDCl}_3$ )  $\delta$  8.78 (s, 4H, tpy- $H^{3',5'}$ ), 8.75-8.74 (d,  $J = 4$  Hz, 4H, tpy- $H^{6,6''}$ ), 8.71- 8.69 (d,  $J = 8$  Hz, 4H, tpy- $H^{3,3''}$ ), 8.29 (s, 1H, Ph- $H^a$ ), 8.12(s, 2H, Ph- $H^b$ ), 7.92-7.88 (t,  $J = 16$  Hz, 4H, tpy- $H^{4,4''}$ ), 7.39-7.36 (t,  $J = 12$  Hz, 4H, tpy- $H^{5,5''}$ ).  $^{13}\text{C}$  NMR (101 MHz,  $\text{CDCl}_3$ )  $\delta$  156.21, 155.99, 149.18, 148.75, 141.50, 136.96, 130.78, 125.13, 124.01, 121.47, 119.10, 77.33, 77.22, 77.01, 76.70.

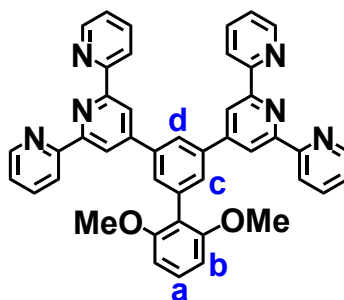

**Compound S6:** 1, 3-dimethoxybromobenzene **S8** (0.78 g, 3.6 mmol) and **S5** (2.00 g, 3.4 mmol) was added to a 500 mL flask, then THF (250 mL) and NaOH (410.0 mg, 10.3 mmol) in 10 mL of water was added. The system was degassed for 10 min, and  $\text{Pd}(\text{PPh}_3)_4$  (0.46 g, 0.4 mmol) as the catalyst was added. The mixture was stirred at 85 °C under nitrogen for 12 h, after cooled to ambient temperature, then concentrated in vacuo followed by column chromatography ( $\text{Al}_2\text{O}_3$ ), eluting with the mixture of petroleum ether and  $\text{CH}_2\text{Cl}_2$  to pure the product, as white solid: 1.50 g, 65%.  $^1\text{H}$  NMR (500 MHz,  $\text{CDCl}_3$ )  $\delta$  8.87 (s, 4H, tpy- $H^{3',5'}$ ), 8.75-8.74 (d,  $J = 4$  Hz, 4H, tpy- $H^{6,6''}$ ), 8.72-8.70 (d,  $J = 8$  Hz, 4H, tpy- $H^{3,3''}$ ), 8.38 (s, 1H,  $H^d$ ), 7.98 (s, 2H,  $H^c$ ), 7.92-7.89 (t,  $J = 12$  Hz, 4H, tpy-  $H^{4,4''}$ ), 7.38-7.35 (m, 5H, tpy- $H^{5,5''}$ , Ph- $H^a$ ) 6.73-6.72 (d,  $J = 4$  Hz, 2H,  $H^b$ ), 3.79 (s, 6H,  $H^{\text{OCH}_3}$ ).  $^{13}\text{C}$  NMR (101 MHz,  $\text{CDCl}_3$ )  $\delta$  161.86, 158.19, 157.70, 156.34, 155.68, 150.45, 150.29, 149.10, 139.41, 138.90, 136.90, 131.04, 130.85, 124.66, 123.76, 121.45, 119.49, 118.61, 118.47, 105.22, 104.14, 55.93. ESI-MS (676.26 calcd. For  $\text{C}_{46}\text{H}_{32}\text{N}_6\text{O}_2$ ):  $m/z$  699.28 $[\text{M}+\text{Na}^+]^+$  (calcd  $m/z$ : 699.24).

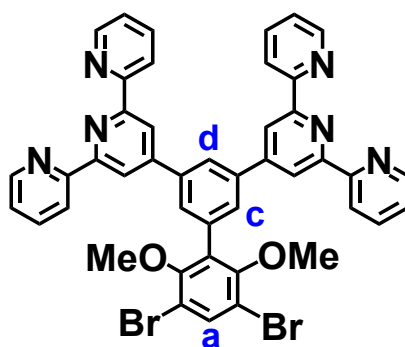

**Compound S7:** To a solution of **S6** (500.0 mg, 0.74 mmol) in  $\text{CHCl}_3$  (50 mL), a solution of  $\text{Br}_2$  (5 mL, 97.5 mmol) in  $\text{CHCl}_3$  (5 mL) was added dropwise. After refluxing for 24 h, the mixture was washed by saturated  $\text{NaHSO}_3$  until colorless. The organic layer was dried (anhydrous  $\text{Na}_2\text{SO}_4$ ), and then concentrated in vacuo to give **S7**, as white solid: 494.0 mg, 80%.  $^1\text{H}$  NMR (500 MHz,  $\text{CDCl}_3$ )  $\delta$  8.87 (s, 4H, tpy- $H^{3',5'}$ ), 8.76-8.75 (d,  $J = 4$  Hz, 4H, tpy- $H^{6,6''}$ ), 8.73-8.71 (d,  $J = 8$  Hz, 4H, tpy- $H^{3,3''}$ ), 8.49 (s, 1H,  $H^d$ ), 8.12 (s, 2H,  $H^c$ ), 7.94-7.91 (t,  $J = 12$  Hz, 4H, tpy- $H^{4,4''}$ ), 7.86 (s, 1H,  $H^a$ ), 7.41-7.38 (d,  $J = 12$  Hz, 4H, tpy- $H^{5,5''}$ ), 3.51 (s, 6H,  $H^{\text{OCH}_3}$ ).  $^{13}\text{C}$  NMR (101 MHz,  $\text{CDCl}_3$ )

$\delta$  156.12, 155.06, 149.75, 149.11, 139.72, 137.01, 135.53, 134.44, 131.48, 129.75, 125.94, 123.95, 121.52, 119.31, 113.31, 60.85.  $^{13}\text{C}$  NMR (101 MHz,  $\text{CDCl}_3$ )  $\delta$  156.29, 156.12, 149.90, 149.21, 136.88, 136.45, 133.73, 133.66, 128.52, 127.38, 125.80, 123.86, 121.39, 119.08, 77.33, 77.01, 76.69. ESI-MS (834.08 calcd. For  $\text{C}_{46}\text{H}_{30}\text{N}_6\text{O}_2\text{Br}_2$ ):  $m/z$  857.11 $[\text{M}+\text{Na}^+]^+$  (calcd  $m/z$ : 857.07).

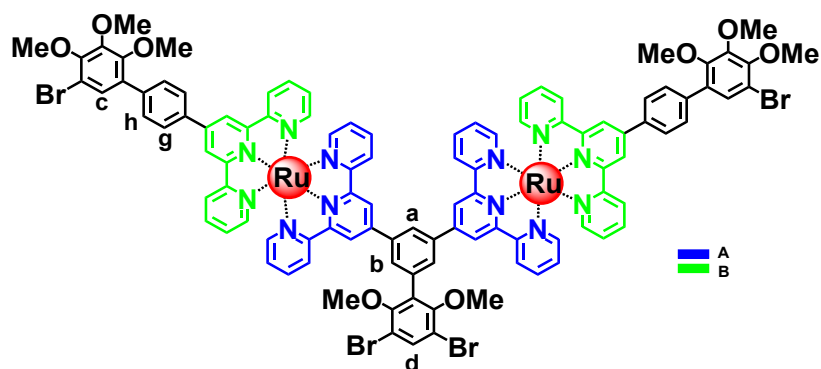

**Compound S9:** To a flask containing a mixture of **S3** (450.0 mg, 0.6 mmol) and **S7** (259.0 mg, 0.3 mmol), MeOH (150 mL),  $\text{CHCl}_3$  (150 mL), and 6 drops of N-ethylmorpholine were added. The mixture was stirred at 75 °C for 24 h. After cooling to ambient temperature, the solvent was evaporated in vacuo and the residue was purified by column chromatography ( $\text{Al}_2\text{O}_3$ ), eluting with a mixture of MeOH and  $\text{CH}_2\text{Cl}_2$ . The complex was obtained, as a red precipitate: 485.0 mg, 70.4%.  $^1\text{H}$  NMR (400 MHz,  $\text{CD}_3\text{CN}$ )  $\delta$  9.36(s, 4H, A-tpy- $H^{3',5'}$ ), 9.16(s, 1H,  $H^a$ ), 9.14(s, 4H, B-tpy- $H^{3',5'}$ ), 8.85-8.83(d,  $J=8$  Hz, 4H, A-tpy- $H^{3,3''}$ ), 8.75-8.73(d,  $J=8$  Hz, 4H, B-tpy- $H^{3,3''}$ ), 8.58(s, 2H,  $H^b$ ), 8.34-8.31(d,  $J=12$  Hz, 4H,  $H^g$ ), 8.14(s, 1H,  $H^d$ ), 8.02-7.99(m, 8H, A-tpy- $H^{4,4''}$ , B-tpy- $H^{4,4''}$ ), 7.91-7.89(d,  $J=12$  Hz, 4H,  $H^h$ ), 7.53-7.52(m, 9H, A-tpy- $H^{6,6''}$ , B-tpy- $H^{6,6''}$ ,  $H^c$ ), 7.25(m, 8H, A-tpy- $H^{5,5''}$ , B-tpy- $H^{5,5''}$ ), 4.02(s, 6H,  $H^{\text{OCH}_3}$ ), 3.97(s, 6H,  $H^{\text{OCH}_3}$ ), 3.79(s, 6H,  $H^{\text{OCH}_3}$ ), 3.75(s, 6H,  $H^{\text{OCH}_3}$ ). ESI-MS (2725.46 calcd. For  $\text{C}_{104}\text{H}_{78}\text{Br}_4\text{F}_{24}\text{N}_{12}\text{O}_8\text{P}_4\text{Ru}_2$ ):  $m/z$  763.60  $[\text{M} - 3\text{PF}_6^-]^{3+}$  (calcd  $m/z$ : 763.53), 1217.85 $[\text{M} - 2\text{PF}_6^-]^{2+}$  (calcd  $m/z$ : 1217.77).

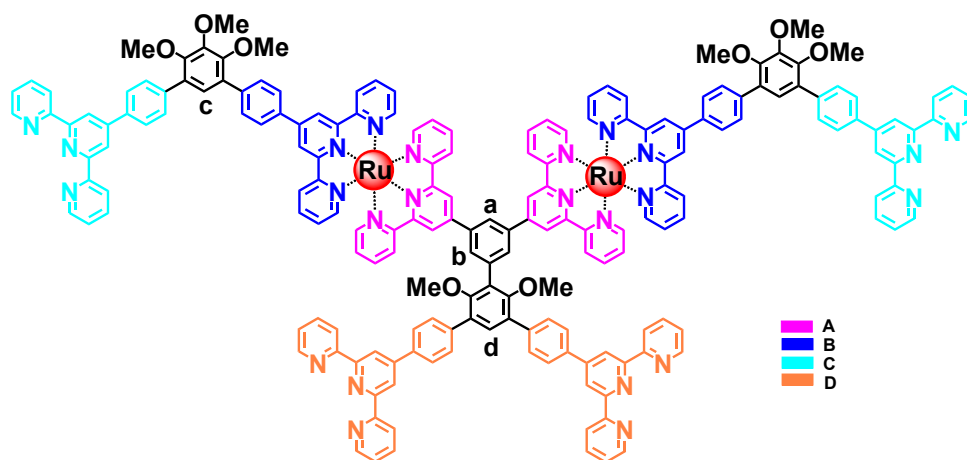

**MOL ligand LA:** **S9** (100.0 mg, 0.04 mmol) and 4'-Boronatopenyl[2,2':6',2'']terpyridine (365.0 mg, 1.0 mmol) was added to a 100 mL flask, then acetonitrile (40 mL), methanol (20 mL) and  $\text{K}_2\text{CO}_3$  (95.0 mg, 0.7 mmol) in 0.7 mL



of water was added. The system was degassed for 10 min, and Pd(PPh<sub>3</sub>)<sub>4</sub> (60.0 mg, 50 μmol) as the catalyst was added. The mixture was stirred at 85 °C under nitrogen for 4 d, after cooled to ambient temperature, then concentrated in vacuo followed by column chromatography (Al<sub>2</sub>O<sub>3</sub>), eluting with the mixture of CH<sub>3</sub>OH and CH<sub>2</sub>Cl<sub>2</sub> to pure the product, as red solid: 72.2 mg, 50.7%. <sup>1</sup>H NMR (400 MHz, CD<sub>3</sub>CN) δ 9.44(s, 4H, A-tpy-*H*<sup>3',5'</sup>), 9.19(s, 1H, *H*<sup>a</sup>), 9.16(s, 4H, B-tpy-*H*<sup>3',5'</sup>), 8.90-8.88(d, *J*=8 Hz, 4H, A-tpy-*H*<sup>3,3''</sup>), 8.87(s, 4H, C-tpy-*H*<sup>3',5'</sup>), 8.84(s, 4H, D-tpy-*H*<sup>3',5'</sup>), 8.78-8.73(m, 22H, B-tpy-*H*<sup>3,3''</sup>, C-tpy-*H*<sup>3,3''</sup>, D-tpy-*H*<sup>3,3''</sup>, C-tpy-*H*<sup>6,6''</sup>, D-tpy-*H*<sup>6,6''</sup>, *H*<sup>b</sup>), 8.36-8.34(d, *J*=8 Hz, 4H, B-*H*<sup>g</sup>), 8.18-8.16(d, *J*=8 Hz, 4H, C-*H*<sup>g</sup>), 8.09-8.00 (m, 28H, A-tpy-*H*<sup>4,4''</sup>, B-tpy-*H*<sup>4,4''</sup>, C-tpy-*H*<sup>4,4''</sup>, D-tpy-*H*<sup>4,4''</sup>, D-*H*<sup>g</sup>, B-*H*<sup>h</sup>, C-*H*<sup>h</sup>), 7.87-7.85 (m, 5H, D-*H*<sup>h</sup>, *H*<sup>d</sup>), 7.56-7.50 (m, 16H, A-tpy-*H*<sup>6,6''</sup>, B-tpy-*H*<sup>6,6''</sup>, C-tpy-*H*<sup>5,5''</sup>, D-tpy-*H*<sup>5,5''</sup>), 7.40(s, 2H, *H*<sup>c</sup>), 7.28-7.25(m, 8H, A-tpy-*H*<sup>5,5''</sup>, B-tpy-*H*<sup>5,5''</sup>), 4.08(s, 6H, *H*<sup>OCH3</sup>), 3.88(s, 6H, *H*<sup>OCH3</sup>), 3.85(s, 6H, *H*<sup>OCH3</sup>), 3.54(s, 6H, *H*<sup>OCH3</sup>). <sup>13</sup>C NMR (101 MHz, CD<sub>3</sub>CN) δ 158.90, 158.79, 158.41, 157.46, 156.88, 156.39, 156.23, 156.03, 153.16, 151.82, 149.94, 138.73, 137.99, 136.43, 136.33, 132.16, 130.81, 130.71, 128.98, 128.61, 128.30, 127.94, 125.45, 125.24, 125.00, 122.02, 121.81, 118.94, 117.99, 2.12, 1.52, 1.31, 1.11, 0.90, 0.69, 0.49, 0.28. ESI-MS (3639.3 calcd. For C<sub>188</sub>H<sub>134</sub>F<sub>24</sub>N<sub>24</sub>O<sub>8</sub>P<sub>4</sub>Ru<sub>2</sub>): *m/z* 764.87 [M – 4PF<sub>6</sub><sup>−</sup>]<sup>4+</sup> (calcd *m/z*: 764.86), 1068.12 [M – 3PF<sub>6</sub><sup>−</sup>]<sup>3+</sup> (calcd *m/z*: 1068.14), 1674.61 [M – 2PF<sub>6</sub><sup>−</sup>]<sup>2+</sup> (calcd *m/z*: 1674.69).

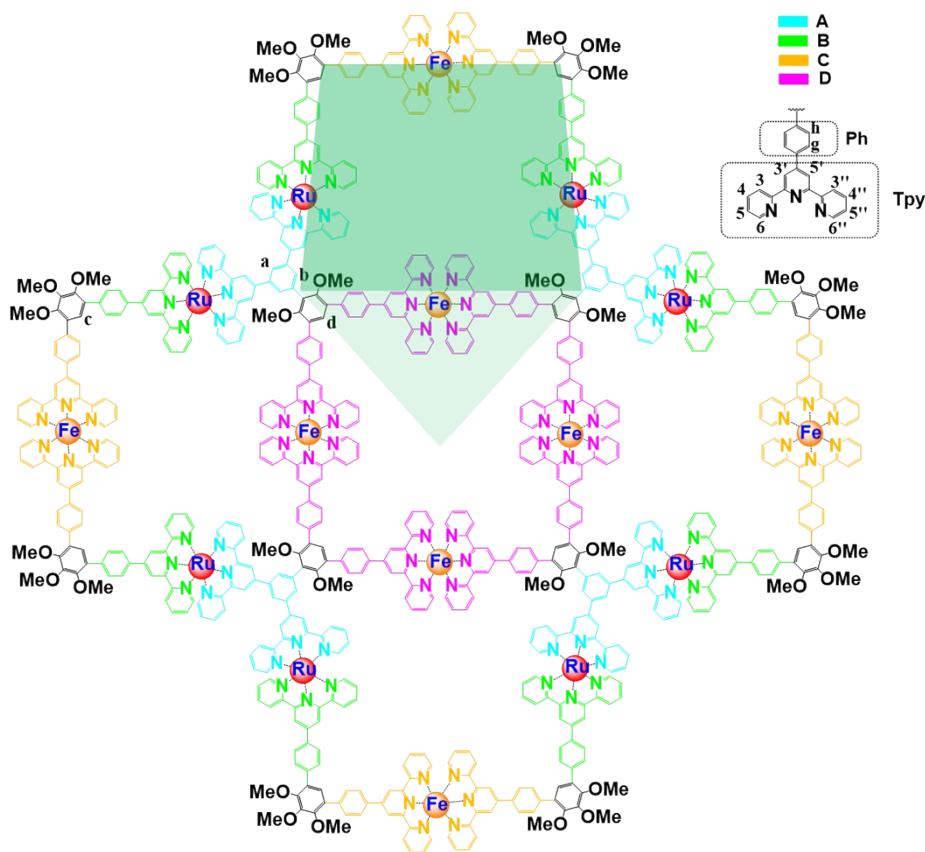

**Metallosupramolecular tetragonum wreaths Fe<sub>8</sub>LA<sub>4</sub>:** MOL LA (3.0 mg, 0.8 μmol), and FeCl<sub>2</sub>·4H<sub>2</sub>O (0.3 mg, 1.6 μmol) was added in a 50 mL flask, then a solvent mixture of CH<sub>3</sub>CN/glycol (10 mL, V:V, 1:2) was added and heated at 180 °C for 12 h, after cooled to ambient temperature, excess bistrifluoromethanesulfonimide lithium salt (LiNTf<sub>2</sub>) in MeOH was added to get a purplish precipitate, which was filtered and washed with H<sub>2</sub>O and MeOH, to generate a purplish solid: 3.5 mg (96%). <sup>1</sup>H NMR (500 MHz, CD<sub>3</sub>CN) δ 9.45(s, 16H, A-tpy-*H*<sup>3',5'</sup>), 9.30(m, 36H, C-tpy-*H*<sup>3',5'</sup>, D-tpy-*H*<sup>3',5'</sup>, *H*<sup>a</sup>), 9.16(s, 16H, B-tpy-*H*<sup>3',5'</sup>), 8.90(s, 20H, A-tpy-*H*<sup>3,3''</sup>, *H*<sup>b</sup>), 8.77-8.69(m, 48H, B-tpy-*H*<sup>3,3''</sup>,

C-tpy- $H^{3,3'}$ , D-tpy- $H^{3,3'}$ ), 8.55-8.48(m, 16H, C- $H^g$ , D- $H^g$ ), 8.39-8.31(m, 16H, B- $H^g$ , C- $H^h$ ), 8.08-7.95(m, 80H, A-tpy- $H^{4,4'}$ , B-tpy- $H^{4,4'}$ , C-tpy- $H^{4,4'}$ , D-tpy- $H^{4,4'}$ , B- $H^h$ , D- $H^h$ ), 7.63-7.59 (m, 32H, A-tpy- $H^{6,6'}$ , B-tpy- $H^{6,6'}$ ), 7.45(s, 4H,  $H^d$ ), 7.30-7.26(m, 56H, C-tpy- $H^{6,6'}$ , D-tpy- $H^{6,6'}$ , A-tpy- $H^{5,5'}$ , B-tpy- $H^{5,5'}$ ), 7.14(m, 32H, C-tpy- $H^{5,5'}$ , D-tpy- $H^{5,5'}$ ), 4.15 (m, 24H,  $H^{OCH_3}$ ), 4.00 (m, 48H,  $H^{OCH_3}$ ), 3.73 (m, 24H,  $H^{OCH_3}$ ). ESI-MS (21648.85 calcd. For  $C_{816}H_{536}F_{192}Fe_8N_{128}O_{160}Ru_8S_{64}$ ): m/z 1884.75  $[M - 10N(SO_2CF_3)_2]^{10+}$  (calcd m/z: 1884.74), m/z 1687.50  $[M - 10N(SO_2CF_3)_2]^{11+}$  (calcd m/z: 1687.93), m/z 1523.25  $[M - 10N(SO_2CF_3)_2]^{12+}$  (calcd m/z: 1523.92), m/z 1385.00  $[M - 10N(SO_2CF_3)_2]^{13+}$  (calcd m/z: 1385.15), m/z 1265.91  $[M - 10N(SO_2CF_3)_2]^{14+}$  (calcd m/z: 1266.20), m/z 1163.23  $[M - 10N(SO_2CF_3)_2]^{15+}$  (calcd m/z: 1163.11), m/z 1072.53  $[M - 10N(SO_2CF_3)_2]^{16+}$  (calcd m/z: 1072.91), m/z 993.05  $[M - 10N(SO_2CF_3)_2]^{16+}$  (calcd m/z: 993.32).

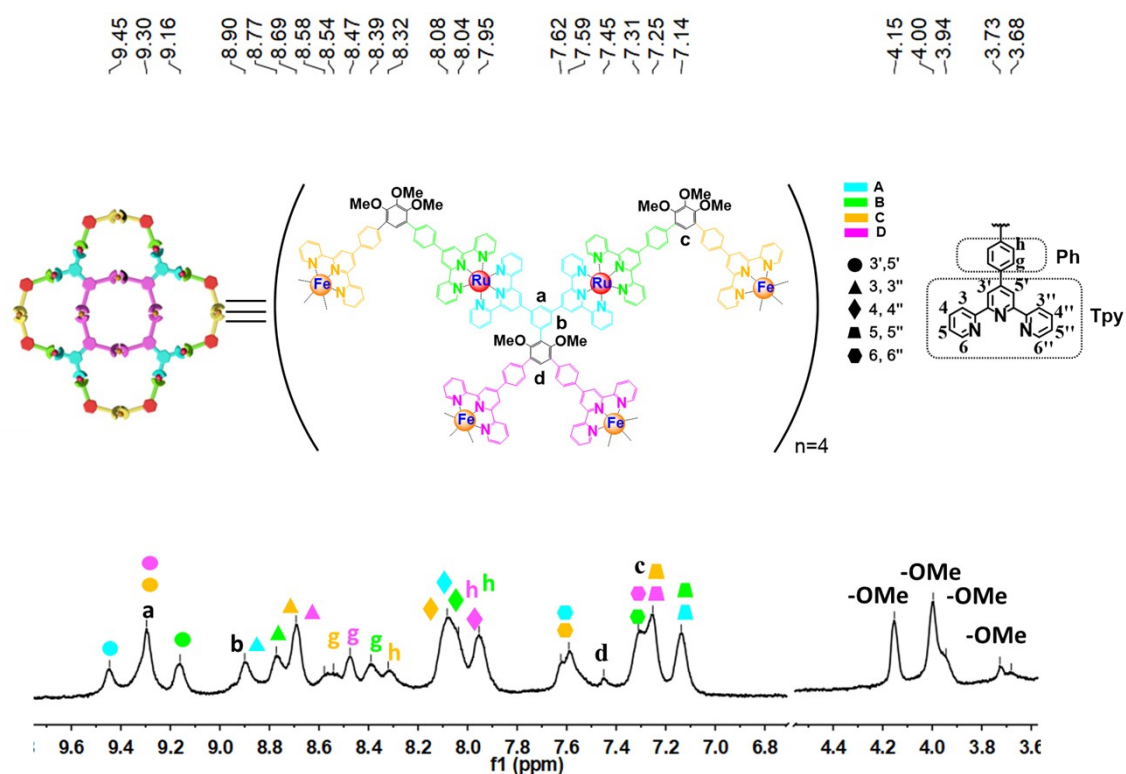

**Figure S5:**  $^1H$  NMR spectrum (500 MHz) of  $Fe_8LA_4$  in  $CD_3CN$ .

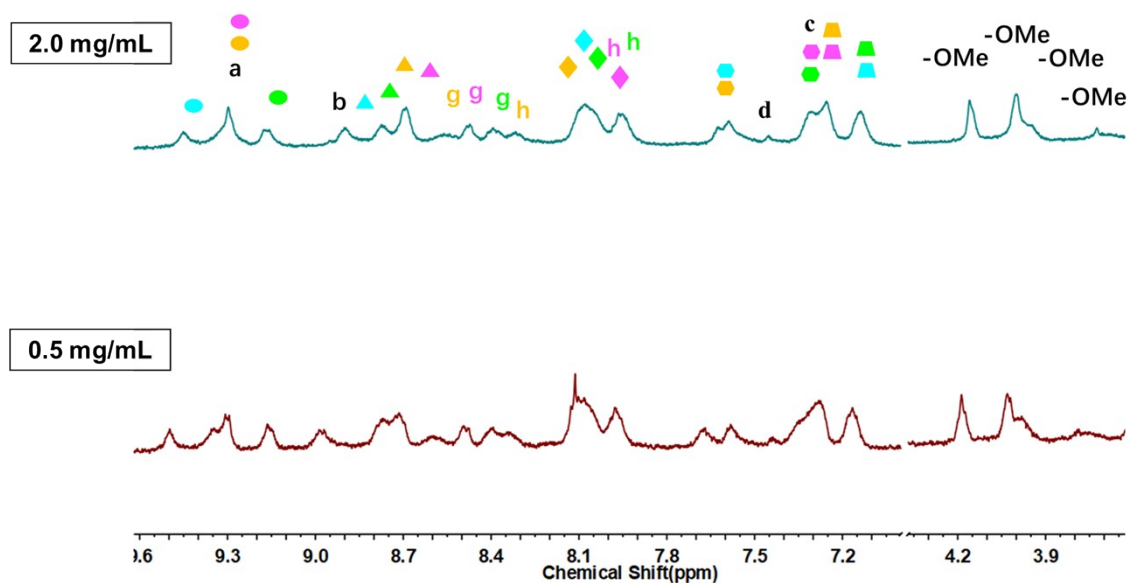

**Figure S6:**  $^1\text{H}$  NMR spectrum (500 MHz) of  $\text{Fe}_8\text{LA}_4$  in  $\text{CD}_3\text{CN}$  under different concentration (2.0 mg/mL and 0.50 mg/mL).

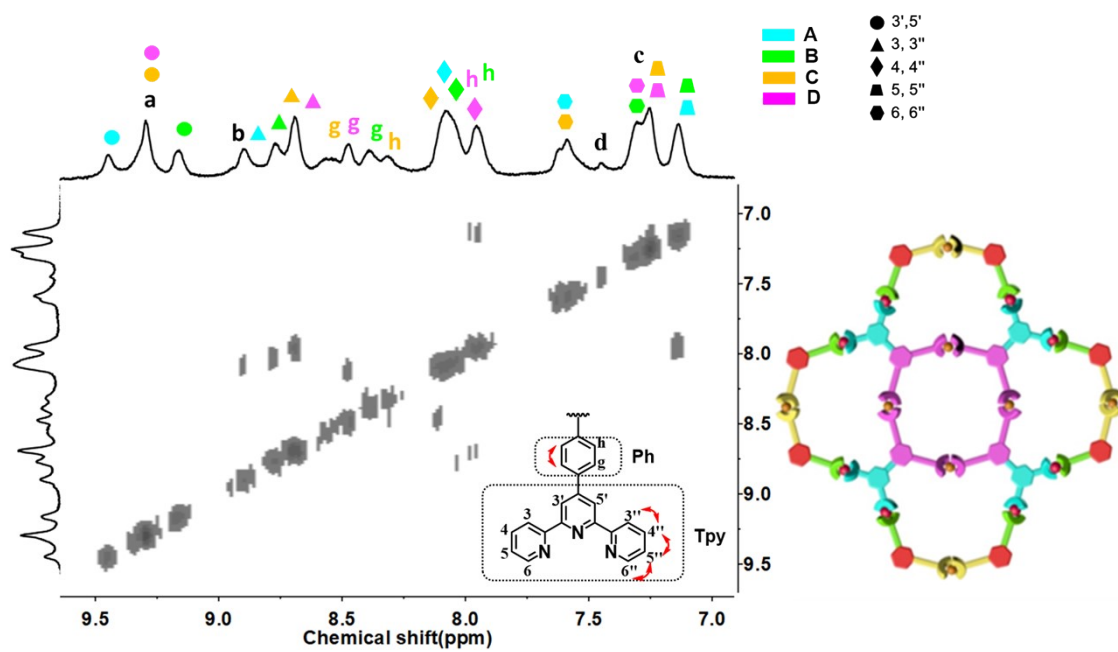

**Figure S7:** 2D COSY spectrum (500 MHz) of  $\text{Fe}_8\text{LA}_4$  in  $\text{CD}_3\text{CN}$ .

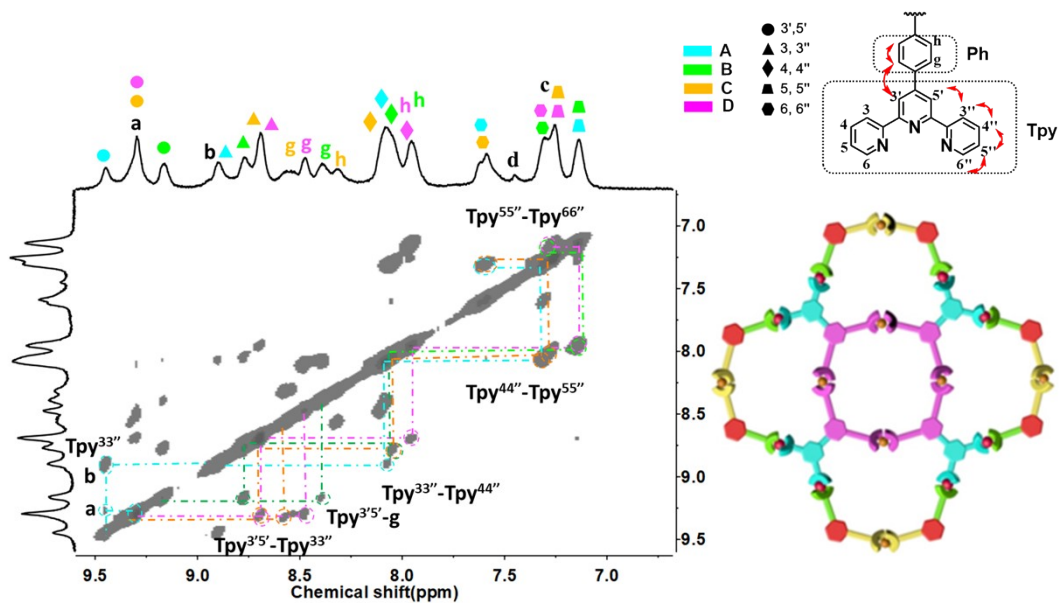

Figure S8: 2D NOESY spectrum (500 MHz) of  $\text{Fe}_8\text{LA}_4$  in  $\text{CD}_3\text{CN}$

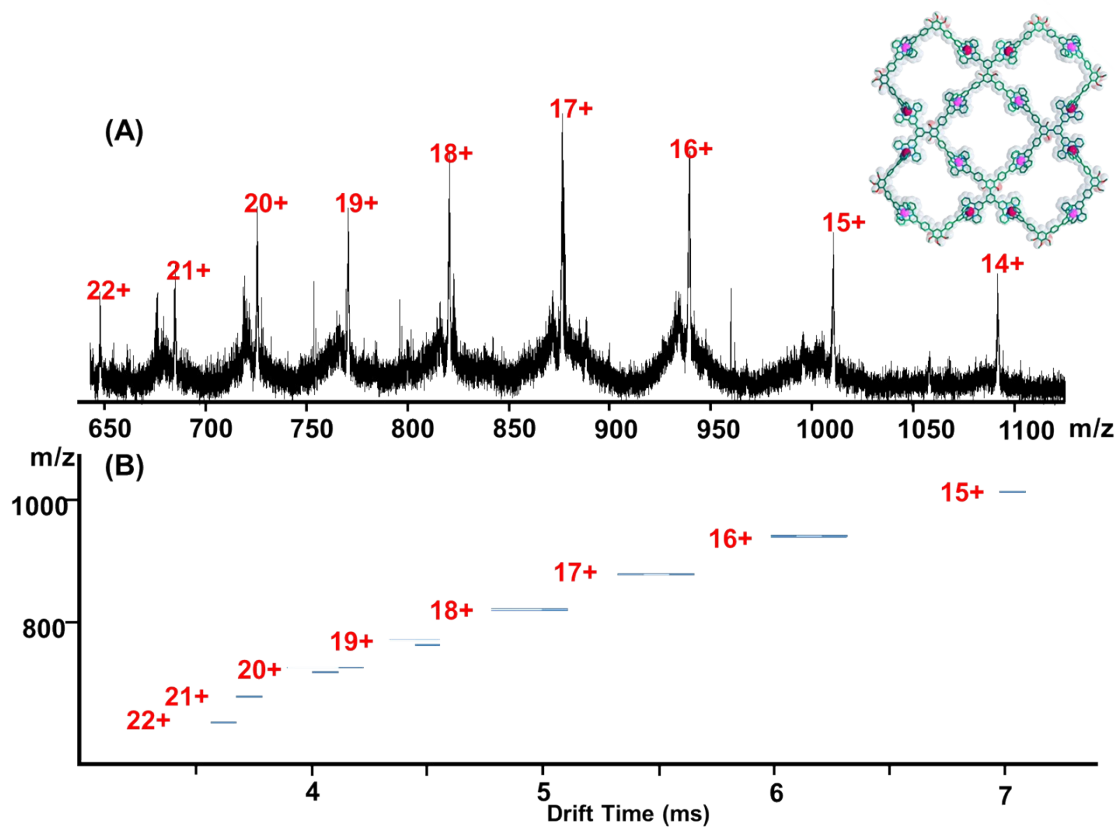

Figure S9: (A) ESI-MS and (B) TWIM-MS plot ( $m/z$  vs drift time) of  $\text{Fe}_8\text{LA}_4$  with 32  $\text{PF}_6^-$ .

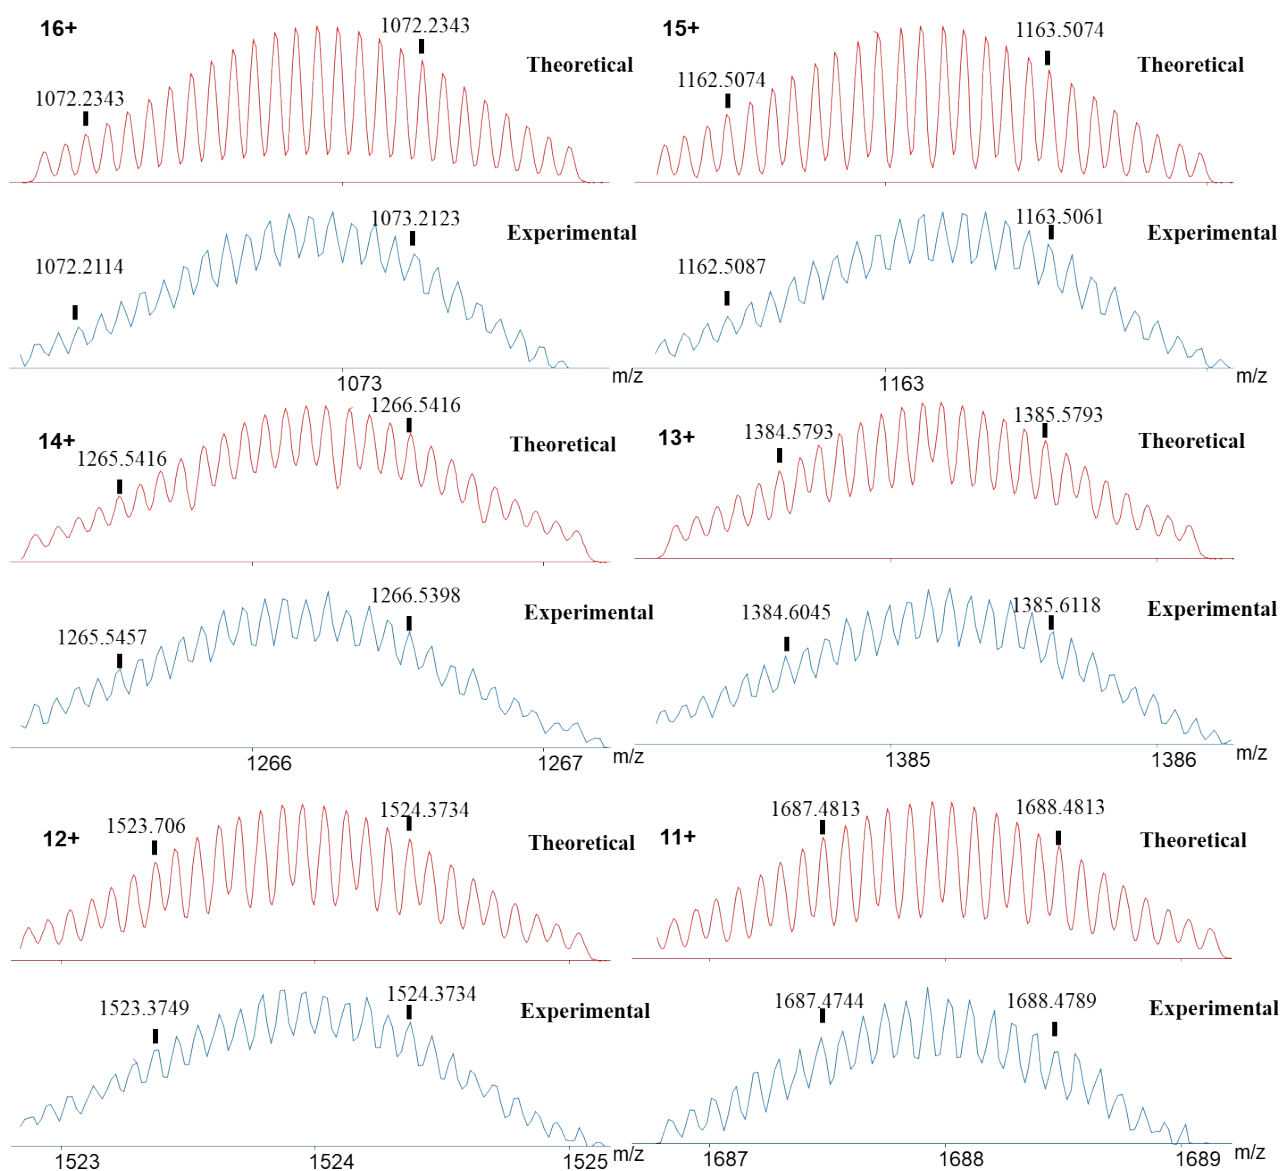

**Figure S10:** Theoretical (top) and experimental (bottom) isotope patterns for the different charge states observed from  $[\text{Fe}_8\text{LA}_4]\cdot 32(\text{NTf}_2^-)$ .

#### 4. Synthesis of the MOL ligand LB and pentagon wreath Fe<sub>10</sub>LB<sub>5</sub>

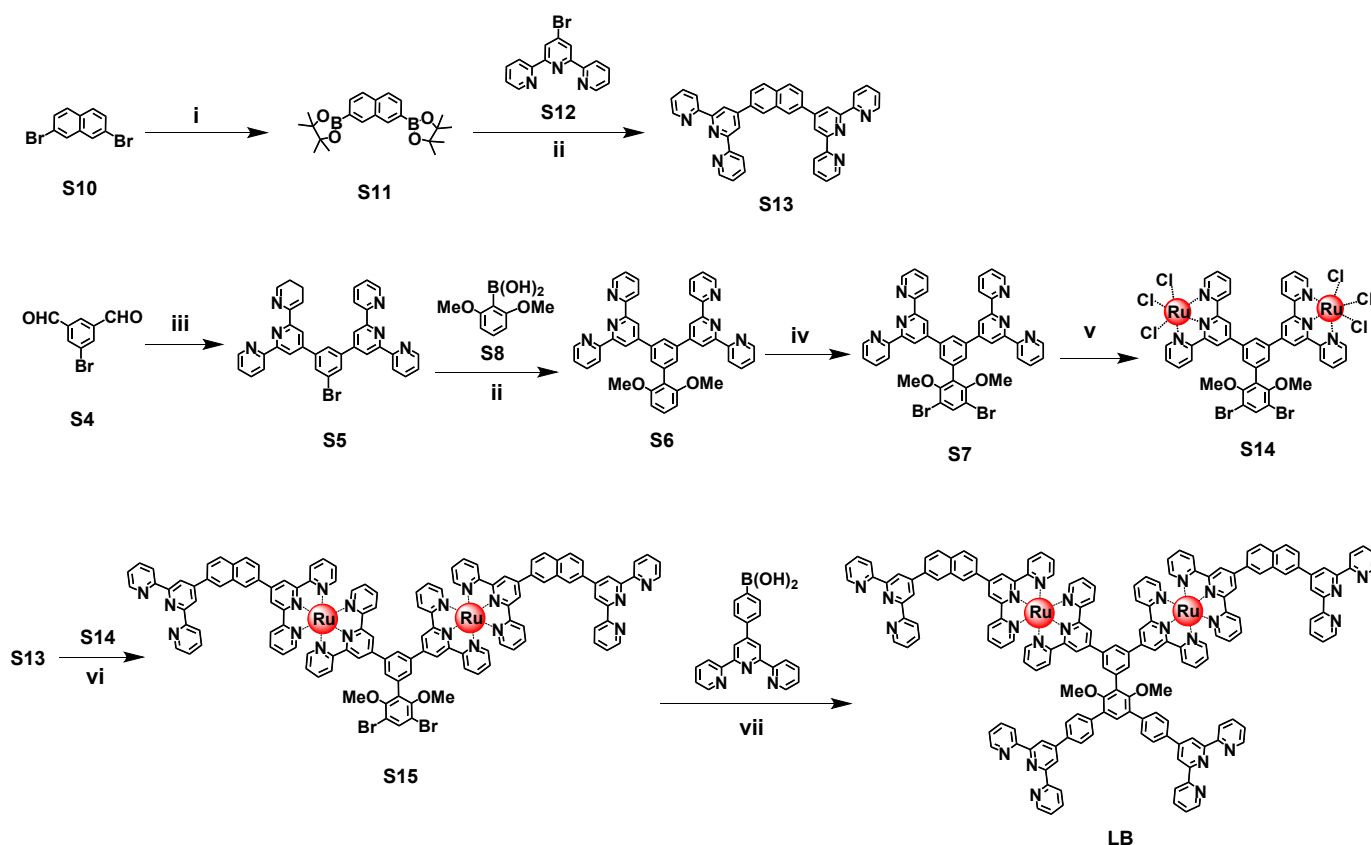

**Scheme S3:** Synthesis of MOL ligand **B**. Reagent and conditions: (i) bisdiboron, Pd(PPh<sub>3</sub>)<sub>4</sub>, THF, NaOH, reflux; (ii) Pd(PPh<sub>3</sub>)<sub>4</sub>, THF, NaOH, reflux; (iii) 2-acetylpyridine, KOH, EtOH, NH<sub>3</sub>•H<sub>2</sub>O, reflux; (iv) Br<sub>2</sub>, CHCl<sub>3</sub>, reflux; (v) RuCl<sub>3</sub>•3H<sub>2</sub>O, EtOH, reflux; (vi) N-ethylmorpholine, CH<sub>3</sub>OH/CHCl<sub>3</sub> (V:V, 1:3); (vii) Tpy-B(OH)<sub>2</sub>, Pd(PPh<sub>3</sub>)<sub>4</sub>, CH<sub>3</sub>CN/CH<sub>3</sub>OH(V:V, 2:1), K<sub>2</sub>CO<sub>3</sub>, reflux.

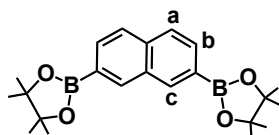

**Compound S11:** 2, 7 - dibromonaphthalene (500.0 mg, 1.6 mmol), bisdiboron (1.10 g, 4.2 mmol), potassium acetate (1.40 g, 14.3 mmol) was added to a 50 mL round bottom flask, added 15 mL DMSO as solvent. The system was degassed for 10 min, and [1,1'-Bis(diphenylphosphino)ferrocene]dichloropalladium(II) (154.0 mg, 0.2 mmol) as the catalyst was added. The mixture was stirred at 85 °C under nitrogen for 24 h , after cooled to ambient temperature, the system was extracted with water and dichloromethane, then recrystallized with methanol and petroleum etherthen, collected the liquid and recrystallized with methanol and H<sub>2</sub>O to pure the product, as white solid: 565.0 mg, 85%. <sup>1</sup>H NMR (400 MHz, CDCl<sub>3</sub>) δ 8.34(s, 2H, H<sup>c</sup>), 7.80-7.78 (d, 2H, J=4Hz, H<sup>a</sup>), 7.74-7.72(d, 2H, J=4Hz, H<sup>b</sup>), 1.31(s, 24H, H<sup>-CH<sub>3</sub></sup>). <sup>13</sup>C NMR (101 MHz, CDCl<sub>3</sub>) δ 137.16, 132.44, 131.54, 126.77, 84.63, 83.87, 77.34, 77.01, 76.71, 24.93.



1H, Ph-H<sup>a</sup>), 9.02-9.01(m, 6H, C-tpy-*H*<sup>3',5'</sup>, Ph-*H*<sup>c</sup>), 8.84-8.73(m, 18H, A-tpy-*H*<sup>3,3''</sup>, B-tpy-*H*<sup>3,3''</sup>, C-tpy-*H*<sup>3,3''</sup>, C-tpy-*H*<sup>6,6''</sup> Ph-*H*<sup>c</sup>), 8.61(s, 2H, Ph-*H*<sup>b</sup>), 8.46 (d, 2H, *J*=8Hz, Ph-*H*<sup>e</sup>), 8.40 (d, 2H, *J*=8Hz, Ph-*H*<sup>e</sup>), 8.29 (d, 2H, *J*=8Hz, Ph-*H*<sup>d</sup>), 8.22 (d, 2H, *J*=8Hz, Ph-*H*<sup>d</sup>), 8.15 (s, 1H, Ph-*H*<sup>m</sup>), 8.05-7.99(m, 12H, A-tpy-*H*<sup>4,4''</sup>, B-tpy-*H*<sup>4,4''</sup>, C-tpy-*H*<sup>4,4''</sup>), 7.59-7.57 (m, 8H, A-tpy-*H*<sup>6,6''</sup>, B-tpy-*H*<sup>6,6''</sup>), 7.51-7.49 (m, 4H, C-tpy-*H*<sup>5,5''</sup>), 7.32-7.27 (m, 8H, A-tpy-*H*<sup>5,5''</sup>, B-tpy-*H*<sup>5,5''</sup>), 3.78(s, 6H, *H*<sup>OMe</sup>). ESI-MS (3338.63 cacl. For C<sub>132</sub>H<sub>82</sub>Br<sub>2</sub>F<sub>24</sub>N<sub>22</sub>O<sub>18</sub>Ru<sub>2</sub>S<sub>8</sub>): m/z 832.64 [M-3N(SO<sub>2</sub>CF<sub>3</sub>)<sub>2</sub>]<sup>3+</sup> (calcd. m/z: 832.73), 1388.87 [M-2N(SO<sub>2</sub>CF<sub>3</sub>)<sub>2</sub>]<sup>2+</sup> (calcd. m/z: 1389.17).

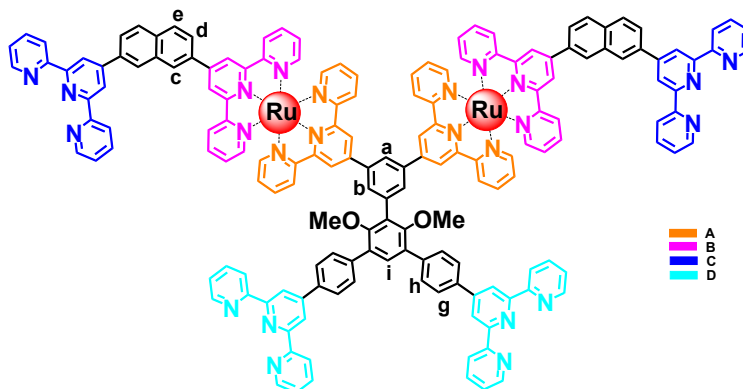

**MOL ligand B:** Compound **S15** (40 mg, 0.017 mmol) and 4'-Boronatopenyl[2,2':6',2'']terpyridine (190.4 mg, 0.5 mmol) was added to a 100 mL flask, then acetonitrile (40 mL), methanol (20 mL) and K<sub>2</sub>CO<sub>3</sub> (56.3 mg, 0.4 mmol) in 0.5 mL of water was added. The system was degassed for 10 min, and Pd(PPh<sub>3</sub>)<sub>4</sub> (47.2 mg, 41 μmol) as the catalyst was added. The mixture was stirred at 85 °C under nitrogen for 4 d, after cooled to ambient temperature, then concentrated in vacuo followed by column chromatography (Al<sub>2</sub>O<sub>3</sub>), eluting with the mixture of MeOH and CH<sub>2</sub>Cl<sub>2</sub> to pure the product, as red solid: 29.8 mg, 65%. <sup>1</sup>H NMR (400 MHz, CD<sub>3</sub>CN) δ 9.41(s, 4H, A-tpy-*H*<sup>3',5'</sup>), 9.30(s, 4H, B-tpy-*H*<sup>3',5'</sup>), 9.21(s, 1H, H<sup>a</sup>), 9.07(s, 2H, H<sup>b</sup>), 9.05(s, 4H, C-tpy-*H*<sup>3',5'</sup>), 8.87(s, 4H, D-tpy-*H*<sup>3',5'</sup>), 8.85-8.82(d, *J* =12 Hz, 4H, A-tpy-*H*<sup>3,3''</sup>), 8.81-8.76(m, 20H, B-tpy-*H*<sup>3,3''</sup>, C-tpy-*H*<sup>3,3''</sup>, D-tpy-*H*<sup>3,3''</sup>, C-tpy-*H*<sup>6,6''</sup>, D-tpy-*H*<sup>6,6''</sup>), 8.43(m, 4H, H<sup>c</sup>), 8.30(m, 4H, H<sup>d</sup>), 8.17-8.15(d, *J* =8 Hz, 4H, D-*H*<sup>g</sup>), 8.09-8.03(m, 21H, A-tpy-*H*<sup>4,4''</sup>, B-tpy-*H*<sup>4,4''</sup>, C-tpy-*H*<sup>4,4''</sup>, D-tpy-*H*<sup>4,4''</sup>, D-*H*<sup>h</sup>, H<sup>i</sup>), 7.88(s, 2H, H<sup>c</sup>), 7.59-7.58(d, *J* =4 Hz, 8H, A-tpy-*H*<sup>6,6''</sup>, B-tpy-*H*<sup>6,6''</sup>), 7.55-7.51(m, 8H, C-tpy-*H*<sup>5,5''</sup>, D-tpy-*H*<sup>5,5''</sup>), 7.31-7.28(m, 8H, A-tpy-*H*<sup>5,5''</sup>, B-tpy-*H*<sup>5,5''</sup>), 3.56(s, 6H, *H*<sup>OCH<sub>3</sub></sup>). <sup>13</sup>C NMR (101 MHz, CD<sub>3</sub>CN) δ 158.88, 158.78, 158.20, 157.66, 157.62, 157.01, 156.97, 156.37, 156.29, 156.18, 153.23, 153.15, 153.11, 152.44, 152.37, 152.30, 151.21, 149.95, 149.56, 149.42, 149.32, 141.02, 139.25, 139.05, 138.82, 138.75, 138.50, 138.48, 137.96, 137.91, 137.02, 129.11, 129.01, 128.78, 128.26, 127.92, 125.53, 125.04, 125.01, 124.92, 122.81, 122.76, 122.48, 122.44, 121.77, 121.72, 119.27, 119.06, 117.91, 61.51, 1.59, 1.52, 1.39, 1.36, 1.31, 1.18, 1.11, 0.90, 0.69, 0.49, 0.28, -0.47. ESI-MS (3254.87 cacl. For C<sub>166</sub>H<sub>110</sub>F<sub>24</sub>N<sub>24</sub>O<sub>2</sub>P<sub>4</sub>Ru<sub>2</sub>): m/z 668.71 [M - 4PF<sub>6</sub>]<sup>4+</sup> (calcd. m/z: 668.76), 939.93 [M - 3PF<sub>6</sub>]<sup>3+</sup> (calcd. m/z: 939.99), 1482.34 [M - 2PF<sub>6</sub>]<sup>2+</sup> (calcd. m/z: 1482.47).



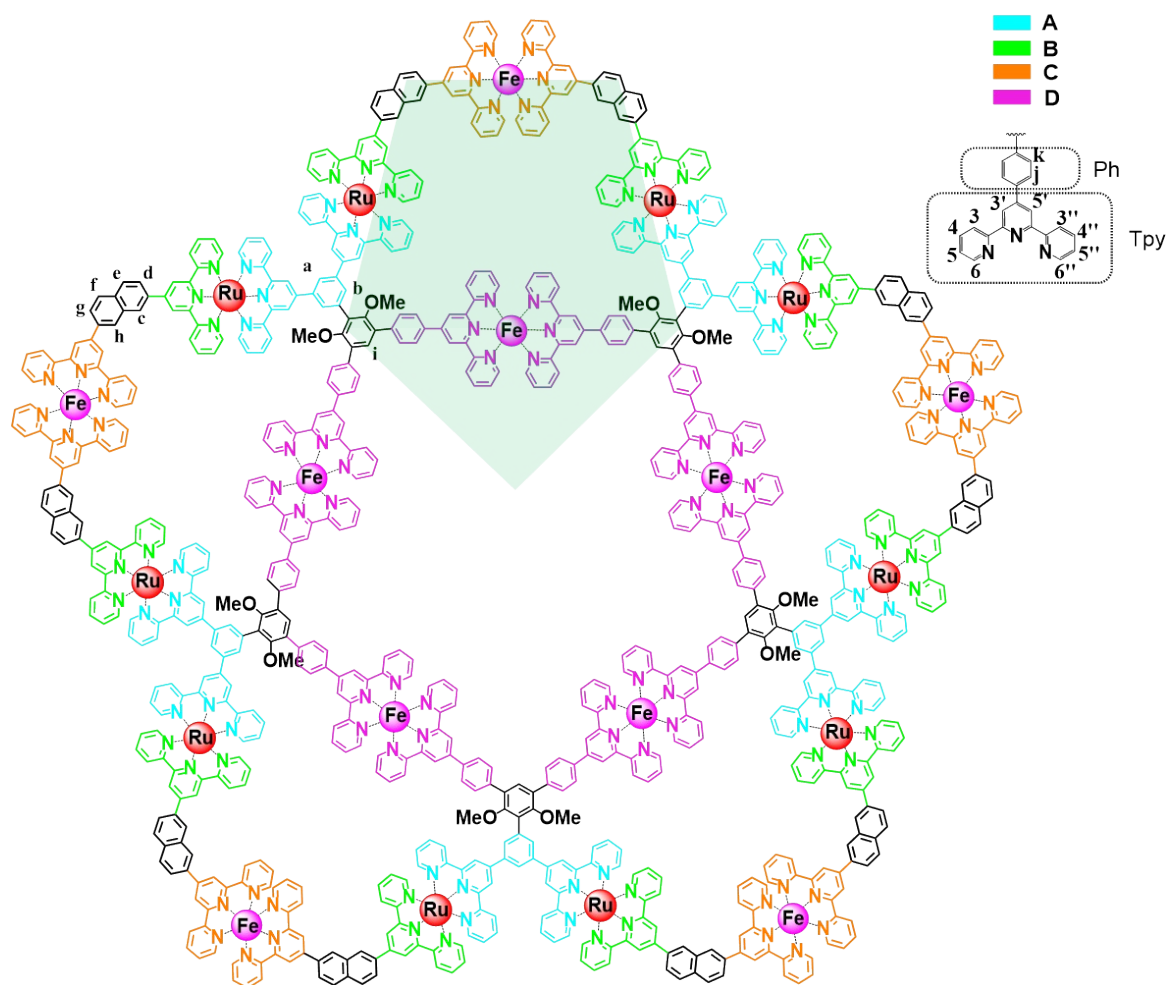

**Metallosupramolecular pentagon wreaths  $\text{Fe}_{10}\text{LB}_5$ :** MOL ligand **B** (3.0 mg, 0.8  $\mu\text{mol}$ ), and  $\text{FeCl}_2 \cdot 4\text{H}_2\text{O}$  (0.3 mg, 1.6  $\mu\text{mol}$ ) was added in a 50 mL flask, then a solvent mixture of  $\text{CH}_3\text{CN}/\text{glycol}$  (10 mL, V:V, 1:2) was added and heated at 180  $^\circ\text{C}$  for 12 h, after cooled to ambient temperature, excess bistrifluoromethanesulfonimide lithium salt ( $\text{LiNTf}_2$ ) in MeOH was added to get a purplish precipitate, which was filtered and washed with  $\text{H}_2\text{O}$  and MeOH to generate a purplish solid: 5.8 mg (93.5%).  $^1\text{H}$  NMR (500 MHz,  $\text{CD}_3\text{CN}$ )  $\delta$  9.49(s, 20H, A-tpy- $H^{3'5'}$ ), 9.46(s, 20H, B-tpy- $H^{3'5'}$ ), 9.40(s, 20H, C-tpy- $H^{3'5'}$ ), 9.31(m, 25H, D-tpy- $H^{3'5'}$ , Ph- $H^a$ ), 9.22(s, 5H, Ph- $H^c$ ), 9.18(s, 10H, Ph- $H^b$ ), 9.08(s, 5H, Ph- $H^e$ ), 8.94-8.85(m, 40H, A-tpy- $H^{3'3''}$ , B-tpy- $H^{3'3''}$ ), 8.79-8.75(m, 20H, C-tpy- $H^{3'3''}$ ), 8.73-8.68(m, 20H, D-tpy- $H^{3'3''}$ ), 8.67-8.51(m, 60H, Ph- $H^{e,d,e',d',h}$ ), 8.34-8.30(m, 20H, Ph- $H^g$ ), 8.13-7.94(m, 85H, A-tpy- $H^{4'4''}$ , B-tpy- $H^{4'4''}$ , C-tpy- $H^{4'4''}$ , D-tpy- $H^{4'4''}$ , Ph- $H^i$ ), 7.68-7.62(m, 40H, A-tpy- $H^{6'6''}$ , B-tpy- $H^{6'6''}$ ), 7.38-7.27(m, 80H, C-tpy- $H^{6'6''}$ , D-tpy- $H^{6'6''}$ , A-tpy- $H^{5'5''}$ , B-tpy- $H^{5'5''}$ ), 7.26-7.12(m, 40H, C-tpy- $H^{5'5''}$ , D-tpy- $H^{5'5''}$ ), 3.66(s, 30H,  $\text{H}^{\text{OMe}}$ ). ESI-MS (25138.93 calcd . For  $\text{C}_{910}\text{H}_{550}\text{F}_{240}\text{Fe}_{10}\text{N}_{160}\text{O}_{170}\text{Ru}_{10}\text{S}_{80}$ ):  $m/z$  2233.50 [ $\text{M} - 13\text{N}(\text{SO}_2\text{CF}_3)_2$ ] $^{10+}$  (calcd  $m/z$ : 2233.75), 2005.05 [ $\text{M} - 14\text{N}(\text{SO}_2\text{CF}_3)_2$ ] $^{11+}$  (calcd  $m/z$ : 2005.21), 1814.41 [ $\text{M} - 15\text{N}(\text{SO}_2\text{CF}_3)_2$ ] $^{12+}$  (calcd  $m/z$ : 1814.76), 1653.37 [ $\text{M} - 13\text{N}(\text{SO}_2\text{CF}_3)_2$ ] $^{13+}$  (calcd  $m/z$ : 1653.61), 1515.22 [ $\text{M} - 14\text{N}(\text{SO}_2\text{CF}_3)_2$ ] $^{14+}$  (calcd  $m/z$ : 1515.49), 1395.57 [ $\text{M} - 15\text{N}(\text{SO}_2\text{CF}_3)_2$ ] $^{15+}$  (calcd  $m/z$ : 1395.78), 1291.05 [ $\text{M} - 16\text{N}(\text{SO}_2\text{CF}_3)_2$ ] $^{16+}$  (calcd  $m/z$ : 1291.03), 1198.67 [ $\text{M} - 17\text{N}(\text{SO}_2\text{CF}_3)_2$ ] $^{17+}$  (calcd  $m/z$ : 1198.61), 1116.55 [ $\text{M} - 18\text{N}(\text{SO}_2\text{CF}_3)_2$ ] $^{18+}$  (calcd  $m/z$ : 1116.46), 1042.99 [ $\text{M} - 19\text{N}(\text{SO}_2\text{CF}_3)_2$ ] $^{19+}$  (calcd  $m/z$ : 1042.95), 976.94 [ $\text{M} - 20\text{N}(\text{SO}_2\text{CF}_3)_2$ ] $^{20+}$  (calcd  $m/z$ : 976.80), 916.88 [ $\text{M} - 21\text{N}(\text{SO}_2\text{CF}_3)_2$ ] $^{21+}$  (calcd  $m/z$ : 916.94).

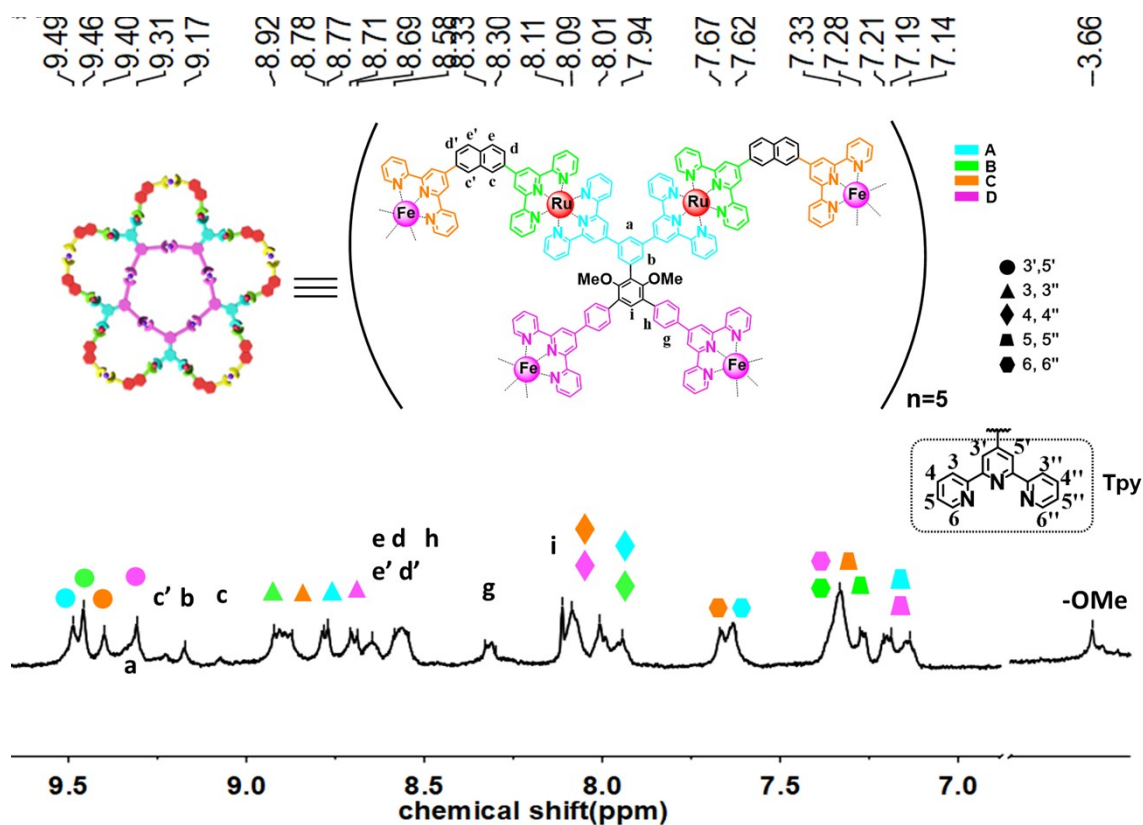

**Figure S11:**  $^1\text{H}$  NMR spectrum (400 MHz) of  $\text{Fe}_{10}\text{LB}_5$  in  $\text{CD}_3\text{CN}$ .

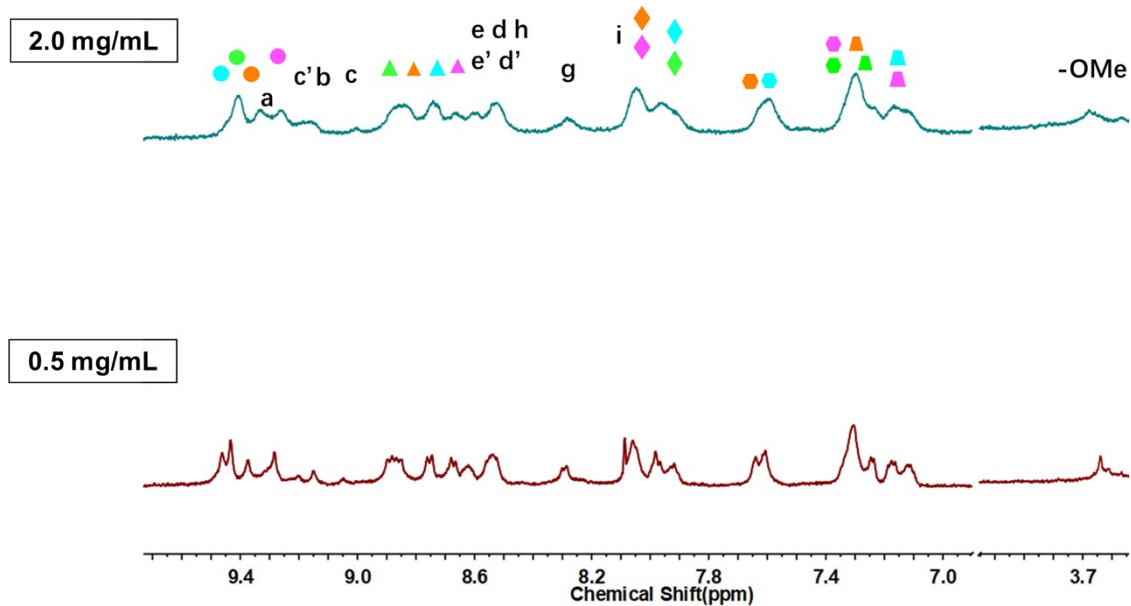

**Figure S12:**  $^1\text{H}$  NMR spectrum (500 MHz) of  $\text{Fe}_{10}\text{LB}_5$  in  $\text{CD}_3\text{CN}$  under different concentration (2.0 mg/mL and 0.50 mg/mL).

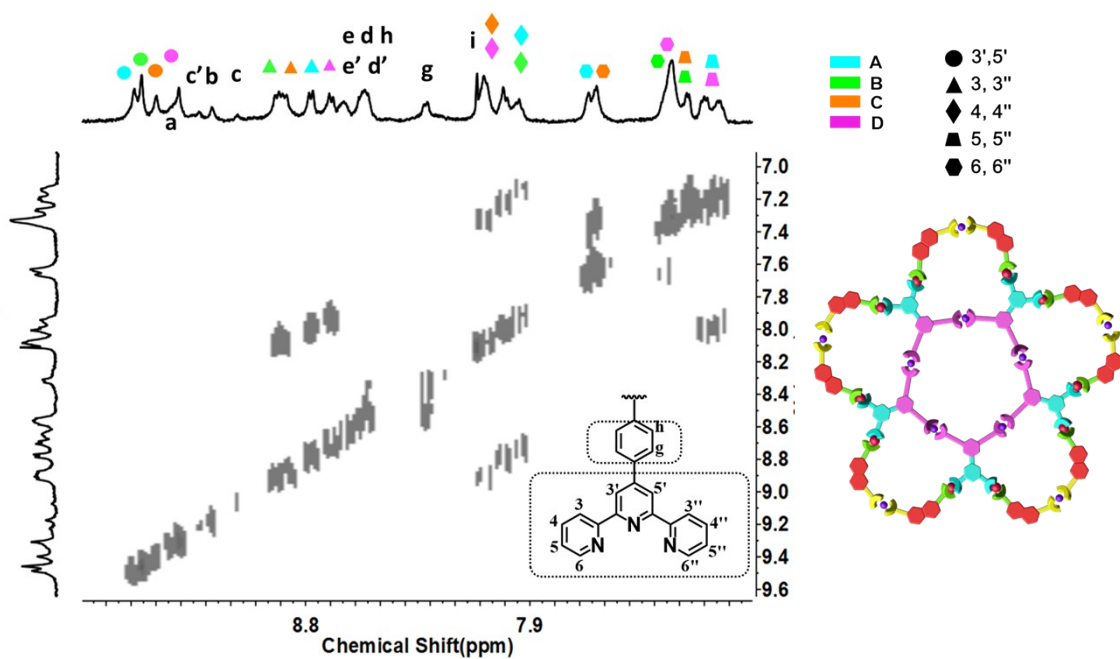

Figure S13: 2D COSY spectrum (400 MHz) of  $\text{Fe}_{10}\text{LB}_5$  in  $\text{CD}_3\text{CN}$ .

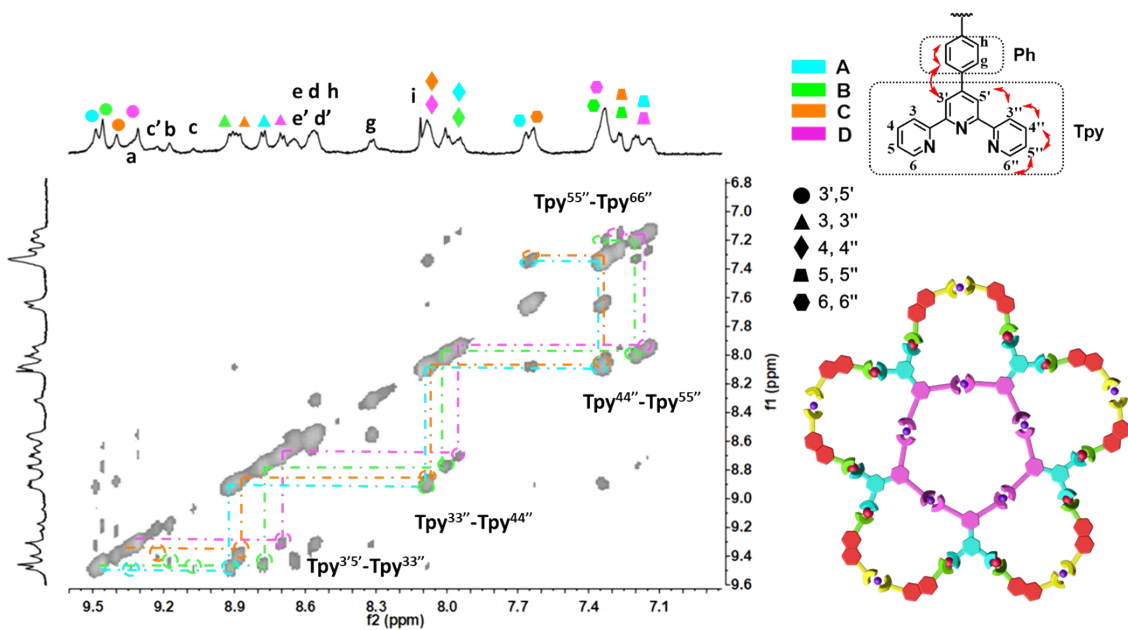

Figure S14: 2D NOESY spectrum (400 MHz) of  $\text{Fe}_{10}\text{LB}_5$  in  $\text{CD}_3\text{CN}$ .

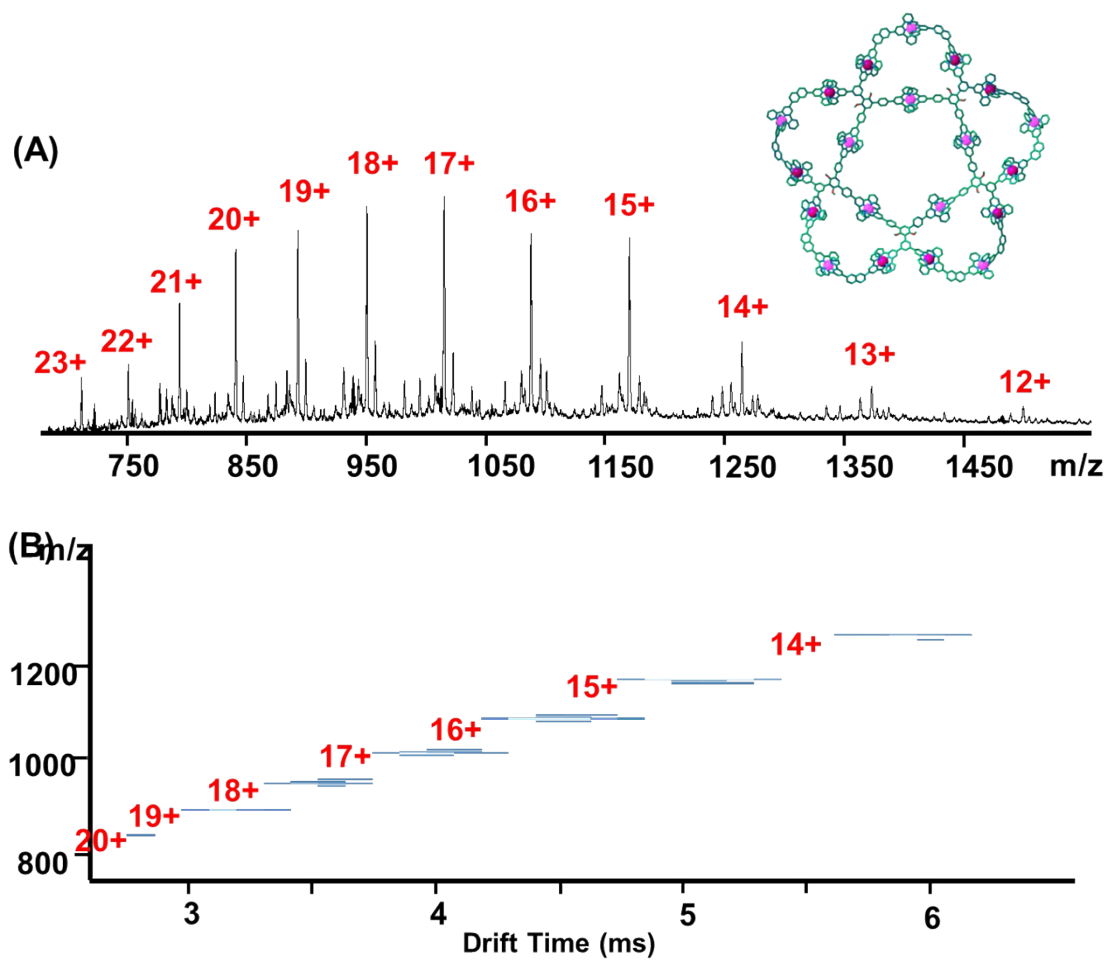

Figure S15: (A) ESI-MS and (B) TWIM-MS plot ( $m/z$  vs drift time) of  $\text{Fe}_{10}\text{LB}_5$  with 40  $\text{PF}_6^-$ .

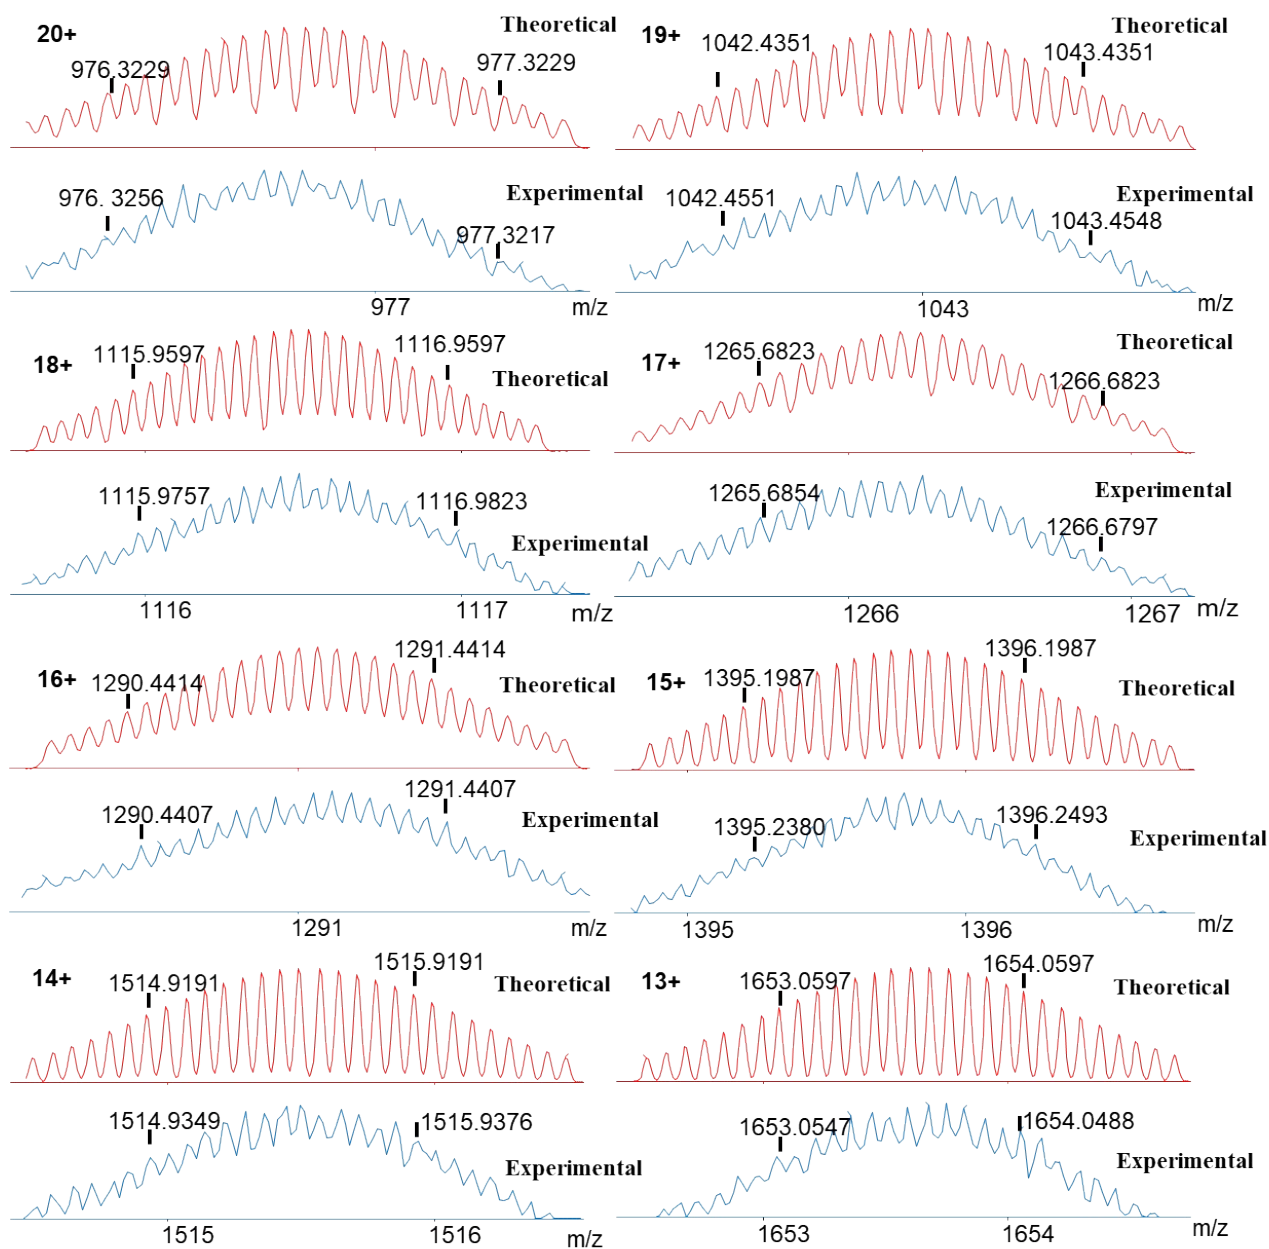

**Figure S16:** Theoretical (top) and experimental (bottom) isotope patterns for the different charge states observed from  $[\text{Fe}_{10}\text{LB}_5]\cdot 40(\text{NTf}_2^-)$ .

## 5. Synthesis of the MOL ligand LC and hexagon wreath Fe<sub>12</sub>LC<sub>6</sub>

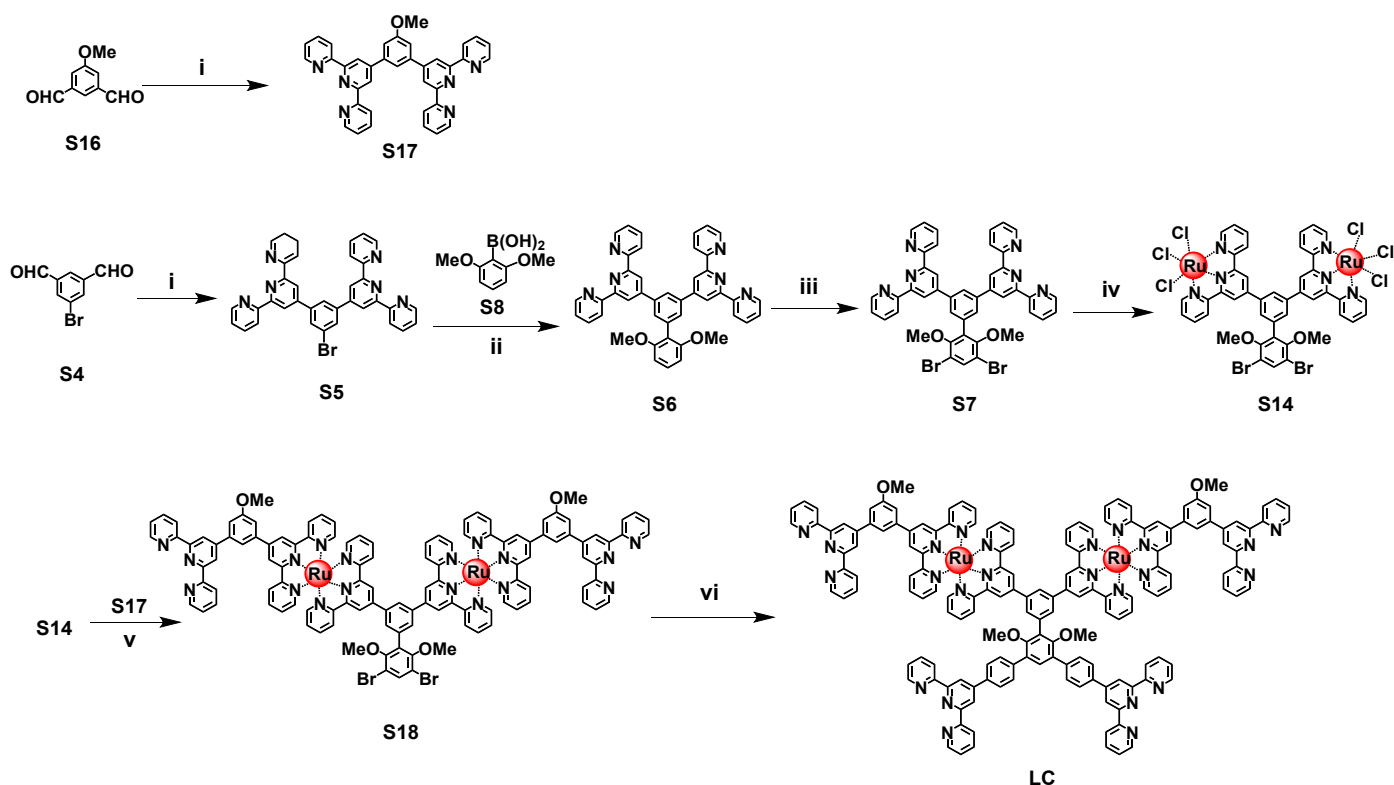

**Scheme S4:** Synthesis of **MOL ligand C**. Reagent and conditions: (i) 2-acetylpyridine, KOH, EtOH, NH<sub>3</sub>·H<sub>2</sub>O, reflux; (ii) Tpy-B(OH)<sub>2</sub>, Pd(PPh<sub>3</sub>)<sub>4</sub>, THF, NaOH, reflux; (iii) Br<sub>2</sub>, CHCl<sub>3</sub>, reflux; (iv) RuCl<sub>3</sub>·3H<sub>2</sub>O, EtOH, reflux; (v) N-ethylmorpholine, CH<sub>3</sub>OH/CHCl<sub>3</sub> (V:V, 1:3), reflux; (vi) Tpy-B(OH)<sub>2</sub>, Pd(PPh<sub>3</sub>)<sub>4</sub>, CH<sub>3</sub>CN/CH<sub>3</sub>OH (V:V, 2:1), K<sub>2</sub>CO<sub>3</sub>, reflux.

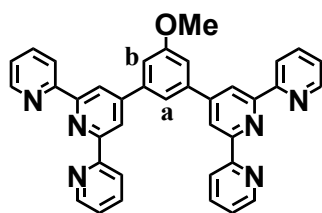

**Compound S17:** To a solution of **S16** (3.2 g, 2 mmol) in EtOH (200 mL), 2-acetylpyridine (5.1 g, 4.8 mmol) and NaOH powder (240.0 mg, 6 mmol) was added. After stirring at room temperature for 24 h, aqueous NH<sub>3</sub>·H<sub>2</sub>O (28%, 150 mL) was added, the resulting mixture was refluxed for 20 h. After cooling to room temperature, the solid was collected by suction filtration and was washed with CH<sub>3</sub>OH to give the product as a white solid: 8.1 g, 72.6%. <sup>1</sup>H NMR (500 MHz, CDCl<sub>3</sub>) δ 8.83 (s, 4H, tpy-H<sup>3'</sup> 5'), 8.77-8.76 (d, 4H, *J* = 2Hz, tpy-H<sup>3''</sup>), 8.72-8.70 (d, 4H, *J* = 4Hz, tpy-H<sup>6''</sup>), 7.99 (s, 1H, Ph-H<sup>a</sup>), 7.93-7.90 (t, 4H, tpy-H<sup>4''</sup>), 7.53 (s, 2H, PH-H<sup>b</sup>), 7.40-7.38 (t, 4H, tpy-H<sup>5''</sup>), 4.04 (s, 3H, H-OMe). <sup>13</sup>C NMR (101 MHz, CDCl<sub>3</sub>) δ 160.67, 156.24, 156.02, 150.21, 149.15, 140.97, 136.89, 123.85, 121.45, 119.33, 119.06, 113.68, 55.87.

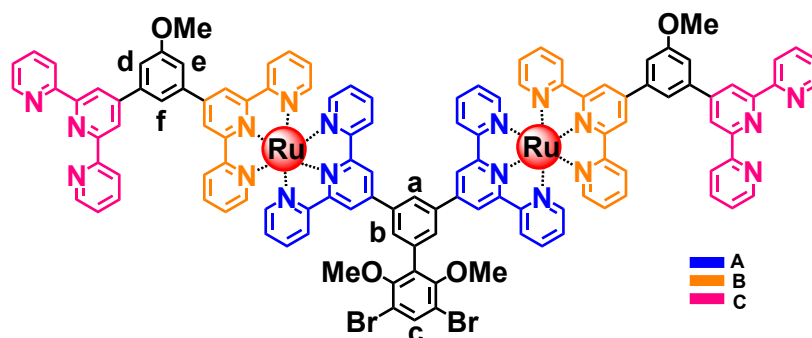

**Compound S18:** To a flask containing a mixture of **S14** (80.0 mg, 0.06 mmol) and **S17** (86.0 mg, 0.15 mmol), MeOH (40 mL),  $\text{CHCl}_3$  (120 mL), and 6 drops of N-ethylmorpholine were added. The mixture was stirred at 75 °C for 2 d. After cooling to ambient temperature, the solvent was evaporated in vacuo and the residue was purified by column chromatography ( $\text{Al}_2\text{O}_3$ ), eluting with a mixture of MeOH and  $\text{CH}_2\text{Cl}_2$ . The complex was obtained, as a red precipitate: 101.8 mg, 72.3%.  $^1\text{H}$  NMR (500 MHz, MeOD)  $\delta$  9.76(s, 4H, A-tpy- $\text{H}^{3',5'}$ ), 9.57(s, 1H,  $\text{H}^a$ ), 9.47 (s, 4H, B-tpy- $\text{H}^{3',5'}$ ), 9.26-9.24 (d, 4H,  $J = 4$  Hz, A-tpy- $\text{H}^{3,3''}$ ), 9.06-9.05 (d, 4H,  $J = 4$  Hz, B-tpy- $\text{H}^{3,3''}$ ), 8.97 (s, 4H, C-tpy- $\text{H}^{3',5'}$ ), 8.81-8.80 (m, 8H, C-tpy- $\text{H}^{3,3''}$ , C-tpy- $\text{H}^{6,6''}$ ), 8.70(s, 2H,  $\text{H}^b$ ), 8.48(s, 2H,  $\text{H}^d$ ), 8.11-8.05 (m, 15H, A,B,C-tpy- $\text{H}^{4,4''}$ ,  $\text{H}^c$ ,  $\text{H}^e$ ), 7.86 (s, 2H,  $\text{H}^f$ ), 7.71-7.70 (d, 4H,  $J = 2$  Hz, B-tpy- $\text{H}^{6,6''}$ ), 7.66-7.65 (d, 4H,  $J = 2$  Hz, A-tpy- $\text{H}^{6,6''}$ ), 7.60-7.59 (d, 4H,  $J = 2$  Hz, C-tpy- $\text{H}^{5,5''}$ ), 7.37-7.35 (m, 8H, A,B-tpy- $\text{H}^{5,5''}$ ), 4.21 (s, 6H,  $\text{H}^{\text{OMe}}$ ), 3.77 (s, 6H,  $\text{H}^{\text{OMe}}$ ).  $^{13}\text{C}$  NMR (101 MHz,  $\text{CD}_3\text{CN}$ )  $\delta$  159.66, 158.89, 158.78, 157.10, 157.08, 157.03, 157.02, 156.98, 156.39, 156.29, 156.27, 156.17, 156.03, 154.36, 153.21, 153.19, 153.13, 153.09, 153.06, 150.24, 149.96, 148.69, 148.53, 148.03, 147.75, 147.31, 147.01, 138.89, 138.83, 138.76, 138.61, 138.53, 138.13, 131.27, 131.17, 129.72, 128.26, 128.18, 127.33, 127.19, 125.38, 125.15, 122.68, 122.48, 122.39, 121.97, 119.45, 119.37, 117.99, 113.32, 61.62, 61.27. ESI-MS (2319.82 calcd. For  $\text{C}_{118}\text{H}_{82}\text{Br}_2\text{Cl}_2\text{N}_{18}\text{O}_4\text{Ru}_2$ ):  $m/z$  737.82  $[\text{M} - 3\text{Cl}^-]^{3+}$  (calcd  $m/z$ : 737.82), 1124.46  $[\text{M} - 2\text{Cl}^-]^{2+}$  (calcd  $m/z$ : 1124.46).

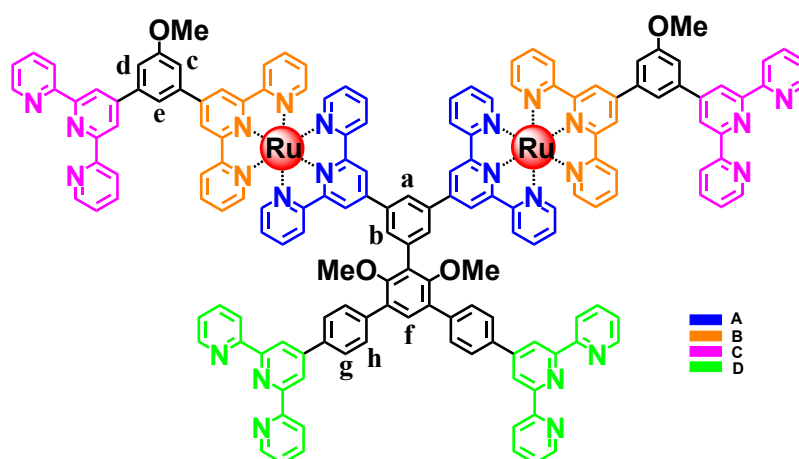

**MOL ligand C:** Compound **S18** (60 mg, 0.02 mmol) and 4'-Boronatopenyl[2,2':6,2'']terpyridine (109.0 mg, 0.31 mmol) was added to a 100 mL flask, then acetonitrile (40 mL), methanol (20 mL) and  $\text{K}_2\text{CO}_3$  (69 mg, 0.5 mmol) in 0.5 mL of water was added. The system was degassed for 10 min, and  $\text{Pd}(\text{PPh}_3)_4$  (29.0 mg, 0.03 mmol) as the

catalyst was added. The mixture was stirred at 85 °C under nitrogen for 2 d, after cooled to ambient temperature, then concentrated in vacuo followed by column chromatography (Al<sub>2</sub>O<sub>3</sub>), eluting with the mixture of MeOH and CH<sub>2</sub>Cl<sub>2</sub> to pure the product, as red solid: 45.0 mg, 63%. <sup>1</sup>H NMR (400 MHz, CD<sub>3</sub>CN) δ 9.39(s, 4H, A-tpy-*H*<sup>3',5'</sup>), 9.18(s, 5H, B-tpy-*H*<sup>3',5'</sup>, *H*<sup>a</sup>), 9.00(s, 4H, C-tpy-*H*<sup>3',5'</sup>), 8.90(s, 4H, D-tpy-*H*<sup>3',5'</sup>), 8.86-8.84(d, *J* = 8 Hz, 4H, A-tpy-*H*<sup>3,3''</sup>), 8.81-8.76(m, 22H, B-tpy-*H*<sup>3,3''</sup>, C-tpy-*H*<sup>3,3''</sup>, D-tpy-*H*<sup>3,3''</sup>, C-tpy-*H*<sup>6,6''</sup>, D-tpy-*H*<sup>6,6''</sup>, *H*<sup>b</sup>), 8.29(s, 2H, *H*<sup>e</sup>), 8.16-8.14 (d, *J* = 8 Hz, 4H, D-*H*<sup>e</sup>), 8.08-8.00 (m, 18H, A-tpy-*H*<sup>4,4''</sup>, B-tpy-*H*<sup>4,4''</sup>, C-tpy-*H*<sup>4,4''</sup>, D-tpy-*H*<sup>4,4''</sup>, D-*H*<sup>b</sup>), 7.92(s, 2H, *H*<sup>c</sup>), 7.87(s, 1H, *H*<sup>f</sup>), 7.75(s, 2H, *H*<sup>d</sup>), 7.58-7.55 (m, 16H, A-tpy-*H*<sup>6,6''</sup>, B-tpy-*H*<sup>6,6''</sup>, C-tpy-*H*<sup>5,5''</sup>, D-tpy-*H*<sup>5,5''</sup>), 7.29-7.27 (m, 8H, A-tpy-*H*<sup>5,5''</sup>, B-tpy-*H*<sup>5,5''</sup>), 4.18(s, 6H, *H*<sup>OCH3</sup>), 3.55(s, 6H, *H*<sup>OCH3</sup>). <sup>13</sup>C NMR (126 MHz, CD<sub>3</sub>CN) δ 161.39, 158.27, 158.19, 156.47, 156.30, 155.99, 155.72, 155.52, 152.61, 152.44, 149.78, 149.56, 149.38, 149.34, 147.99, 147.07, 141.71, 139.27, 138.88, 138.19, 138.17, 137.48, 137.35, 137.28, 130.99, 130.12, 130.07, 127.67, 127.56, 127.30, 124.76, 124.46, 124.35, 122.17, 121.83, 121.27, 121.20, 121.08, 119.11, 119.02, 118.65, 118.28, 114.66, 60.82, 55.86, 48.87. ESI-MS (3755.49 calcd. For C<sub>168</sub>H<sub>110</sub>F<sub>24</sub>N<sub>28</sub>O<sub>20</sub>Ru<sub>2</sub>S<sub>8</sub>): *m/z* 971.42 [M – 3 N(SO<sub>2</sub>CF<sub>3</sub>)<sub>2</sub>]<sup>3+</sup> (calcd *m/z*: 971.68), 1597.52 [M – 2 N(SO<sub>2</sub>CF<sub>3</sub>)<sub>2</sub>]<sup>2+</sup> (calcd *m/z*: 1597.60).

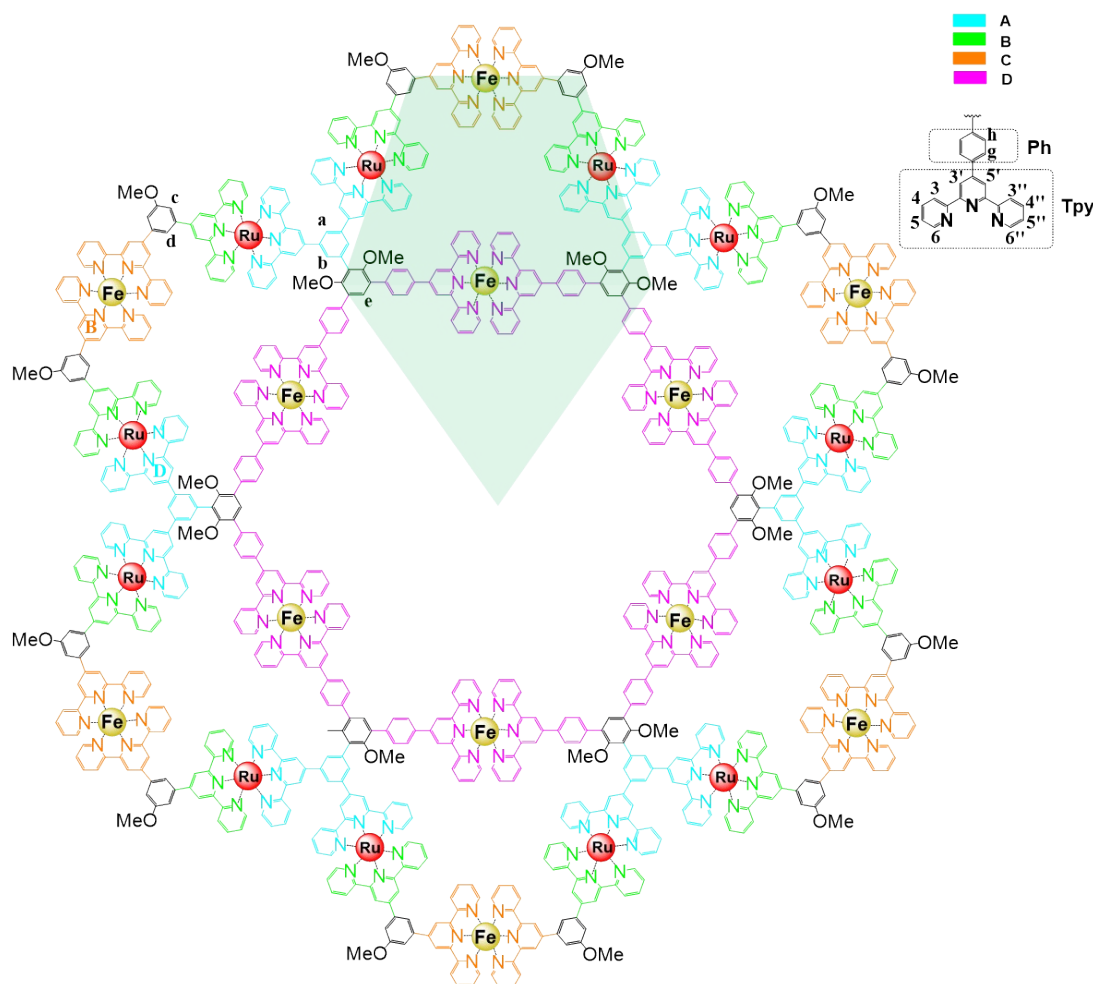

**Metallosupramolecular hexagon wreaths Fe<sub>12</sub>LC<sub>6</sub>:** MOL ligand C (3.0 mg, 0.09 μmol), and FeCl<sub>2</sub>·4H<sub>2</sub>O (0.4 mg, 0.19 μmol) was added in a 50 mL flask, then a solvent mixture of CH<sub>3</sub>CN/glycol (10 mL, V:V, 1:2) was added and heated at 180 °C for 12 h, after cooled to ambient temperature, excess bistrifluoromethanesulfonimide lithium salt (LiNTf<sub>2</sub>) in MeOH was added to get a purplish precipitate, which was filtered and washed with H<sub>2</sub>O and MeOH,



to generate a purplish solid: 3.1 mg (96.4%).  $^1\text{H}$  NMR (500 MHz,  $\text{CD}_3\text{CN}$ )  $\delta$  9.45-9.20(m, 102H, A-tpy- $H^{3'5'}$ , B-tpy- $H^{3'5'}$ , C-tpy- $H^{3'5'}$ , D-tpy- $H^{3'5'}$ , Ph- $H^a$ ), 9.00-8.51(m, 144H, A-tpy- $H^{3'3''}$ , B-tpy- $H^{3'3''}$ , C-tpy- $H^{3'3''}$ , D-tpy- $H^{3'3''}$ , Ph- $H^b$ , Ph- $H^h$ ), 8.35-7.82(m, 144H, A-tpy- $H^{4'4''}$ , B-tpy- $H^{4'4''}$ , C-tpy- $H^{4'4''}$ , D-tpy- $H^{4'4''}$ , Ph- $H^c$ , Ph- $H^d$ ), 7.69-7.48(m, 78H, A-tpy- $H^{6'6''}$ , B-tpy- $H^{6'6''}$ , C-tpy- $H^{6'6''}$ , Ph- $H^e$ ), 7.32-7.06(m, 120H, D-tpy- $H^{6'6''}$ , A-tpy- $H^{5'5''}$ , B-tpy- $H^{5'5''}$ , C-tpy- $H^{5'5''}$ , D-tpy- $H^{5'5''}$ ), 4.33(s, 36H,  $H^{\text{OMe}}$ ), 3.59(s, 36H,  $H^{\text{OMe}}$ ). ESI-MS (29926.30 cacl. For  $\text{C}_{1056}\text{H}_{660}\text{F}_{288}\text{Fe}_{12}\text{N}_{192}\text{O}_{216}\text{Ru}_{12}\text{S}_{96}$ ):  $m/z$  1590.19  $[\text{M} - 16\text{N}(\text{SO}_2\text{CF}_3)_2]^{16+}$  (calcd  $m/z$ : 1590.24), 1480.07  $[\text{M} - 17\text{N}(\text{SO}_2\text{CF}_3)_2]^{17+}$  (calcd  $m/z$ : 1480.22), 1382.12  $[\text{M} - 18\text{N}(\text{SO}_2\text{CF}_3)_2]^{18+}$  (calcd  $m/z$ : 1382.43), 1294.76  $[\text{M} - 19\text{N}(\text{SO}_2\text{CF}_3)_2]^{19+}$  (calcd  $m/z$ : 1294.92), 1215.88  $[\text{M} - 20\text{N}(\text{SO}_2\text{CF}_3)_2]^{20+}$  (calcd  $m/z$ : 1216.17), 1144.84  $[\text{M} - 21\text{N}(\text{SO}_2\text{CF}_3)_2]^{21+}$  (calcd  $m/z$ : 1144.92), 1080.04  $[\text{M} - 22\text{N}(\text{SO}_2\text{CF}_3)_2]^{22+}$  (calcd  $m/z$ : 1080.14), 1020.93  $[\text{M} - 23\text{N}(\text{SO}_2\text{CF}_3)_2]^{23+}$  (calcd  $m/z$ : 1021.00), 966.63  $[\text{M} - 24\text{N}(\text{SO}_2\text{CF}_3)_2]^{24+}$  (calcd  $m/z$ : 966.78).

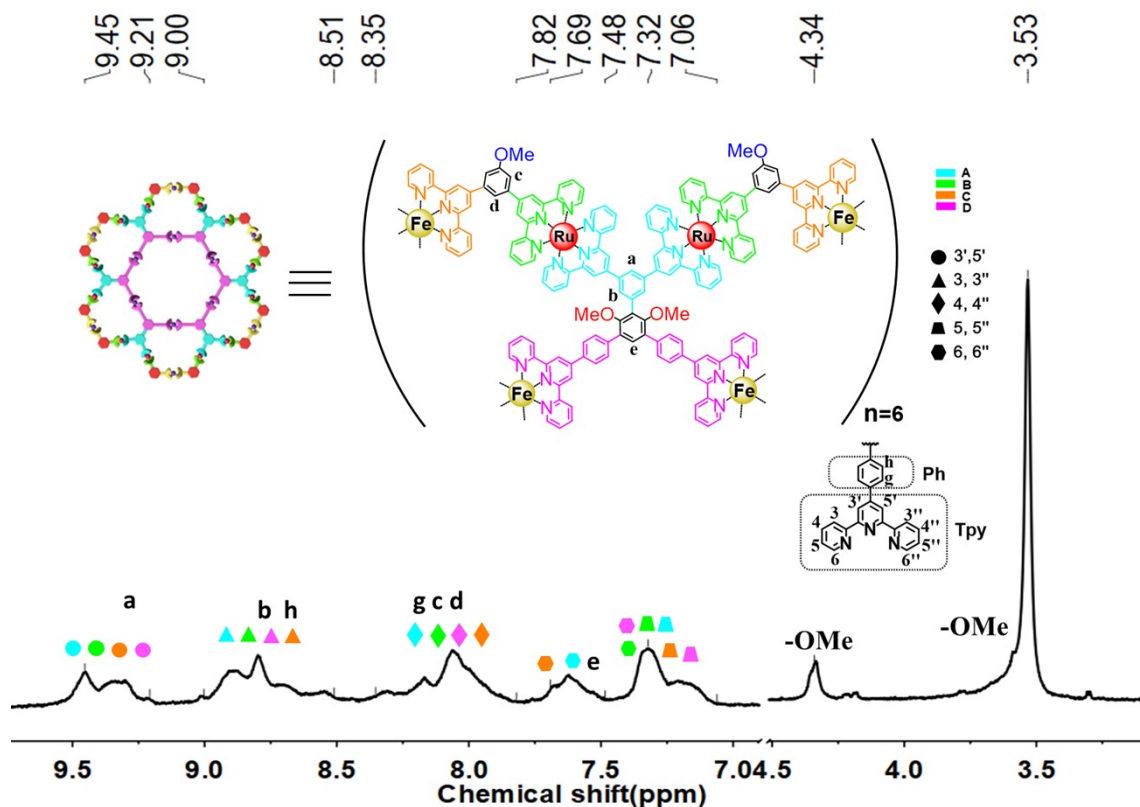

**Figure S17:**  $^1\text{H}$  NMR spectrum (500 MHz) of  $\text{Fe}_{12}\text{LC}_6$  in  $\text{CD}_3\text{CN}$ .

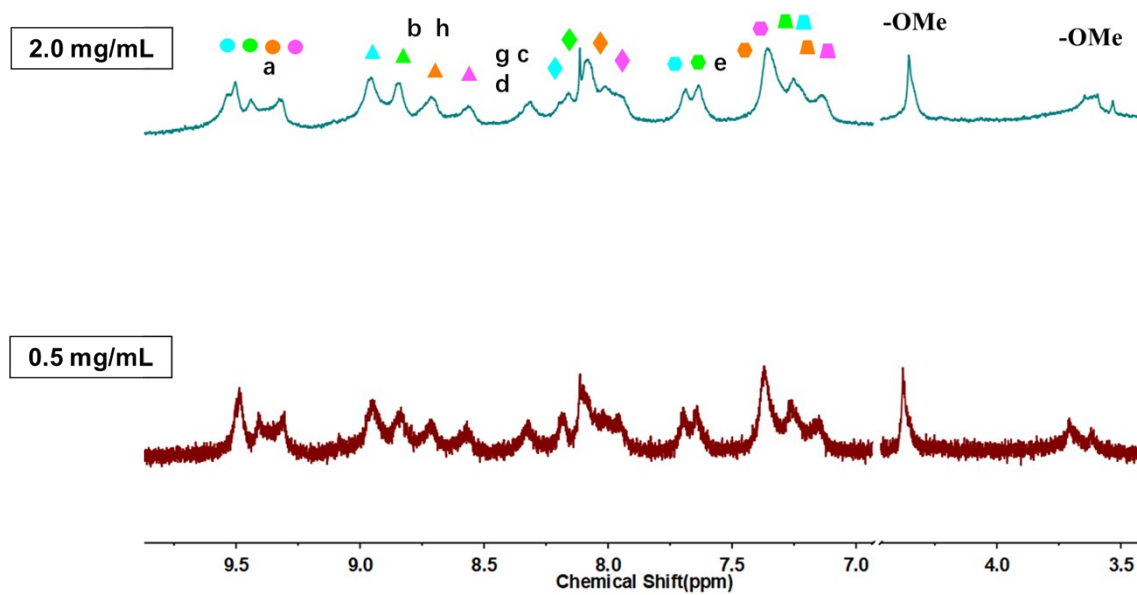

**Figure S18:**  $^1\text{H}$  NMR spectrum (500 MHz) of  $\text{Fe}_{12}\text{LC}_6$  in  $\text{CD}_3\text{CN}$  under different concentration (2.0 mg/mL and 0.50 mg/mL).

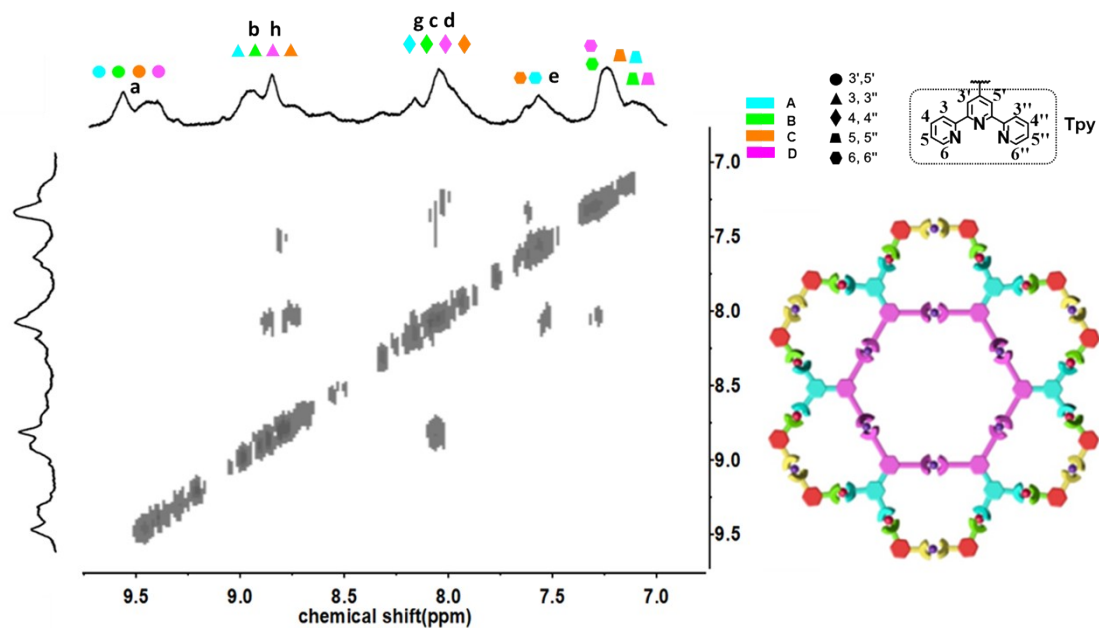

**Figure S19:** 2D COSY spectrum (400 MHz) of  $\text{Fe}_{12}\text{LC}_6$  in  $\text{CD}_3\text{CN}$ .

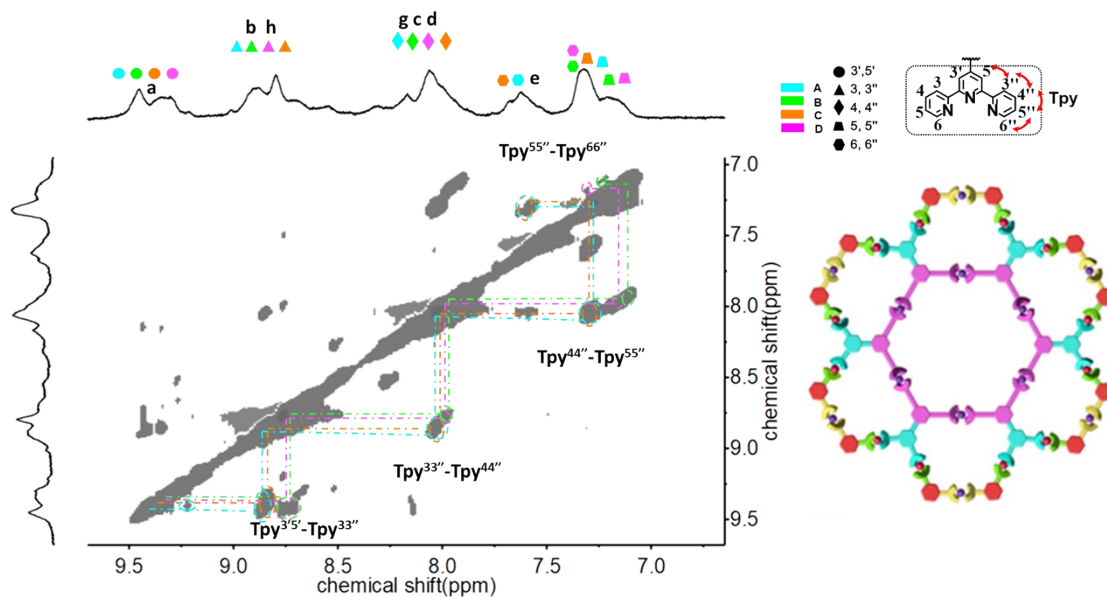

Figure S20: 2D NOESY spectrum (400 MHz) of  $\text{Fe}_{12}\text{LC}_6$  in  $\text{CD}_3\text{CN}$ .

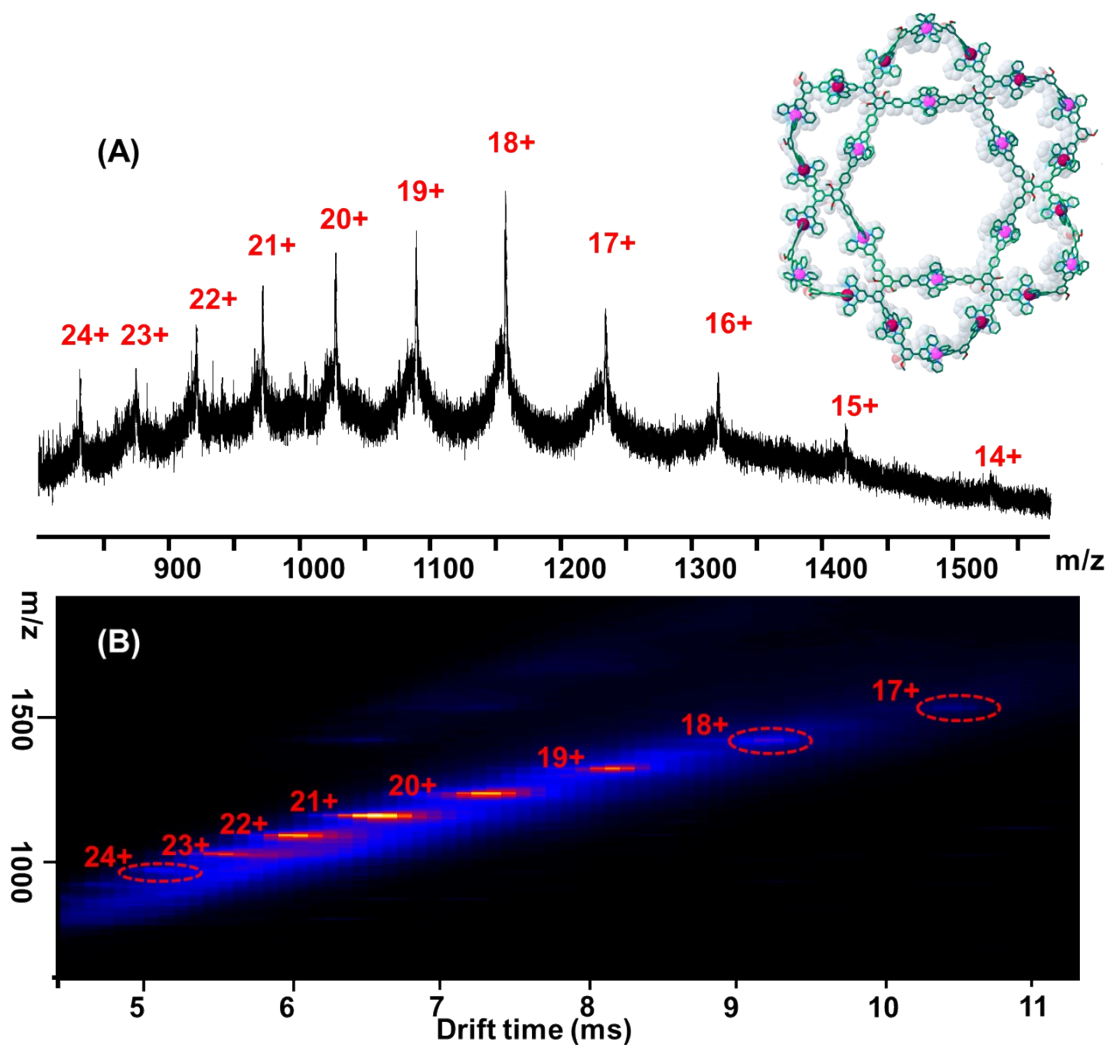

Figure S21: (A) ESI-MS and (B) TWIM-MS plot ( $m/z$  vs drift time) of  $\text{Fe}_{12}\text{LC}_6$  with 48  $\text{PF}_6^-$ .

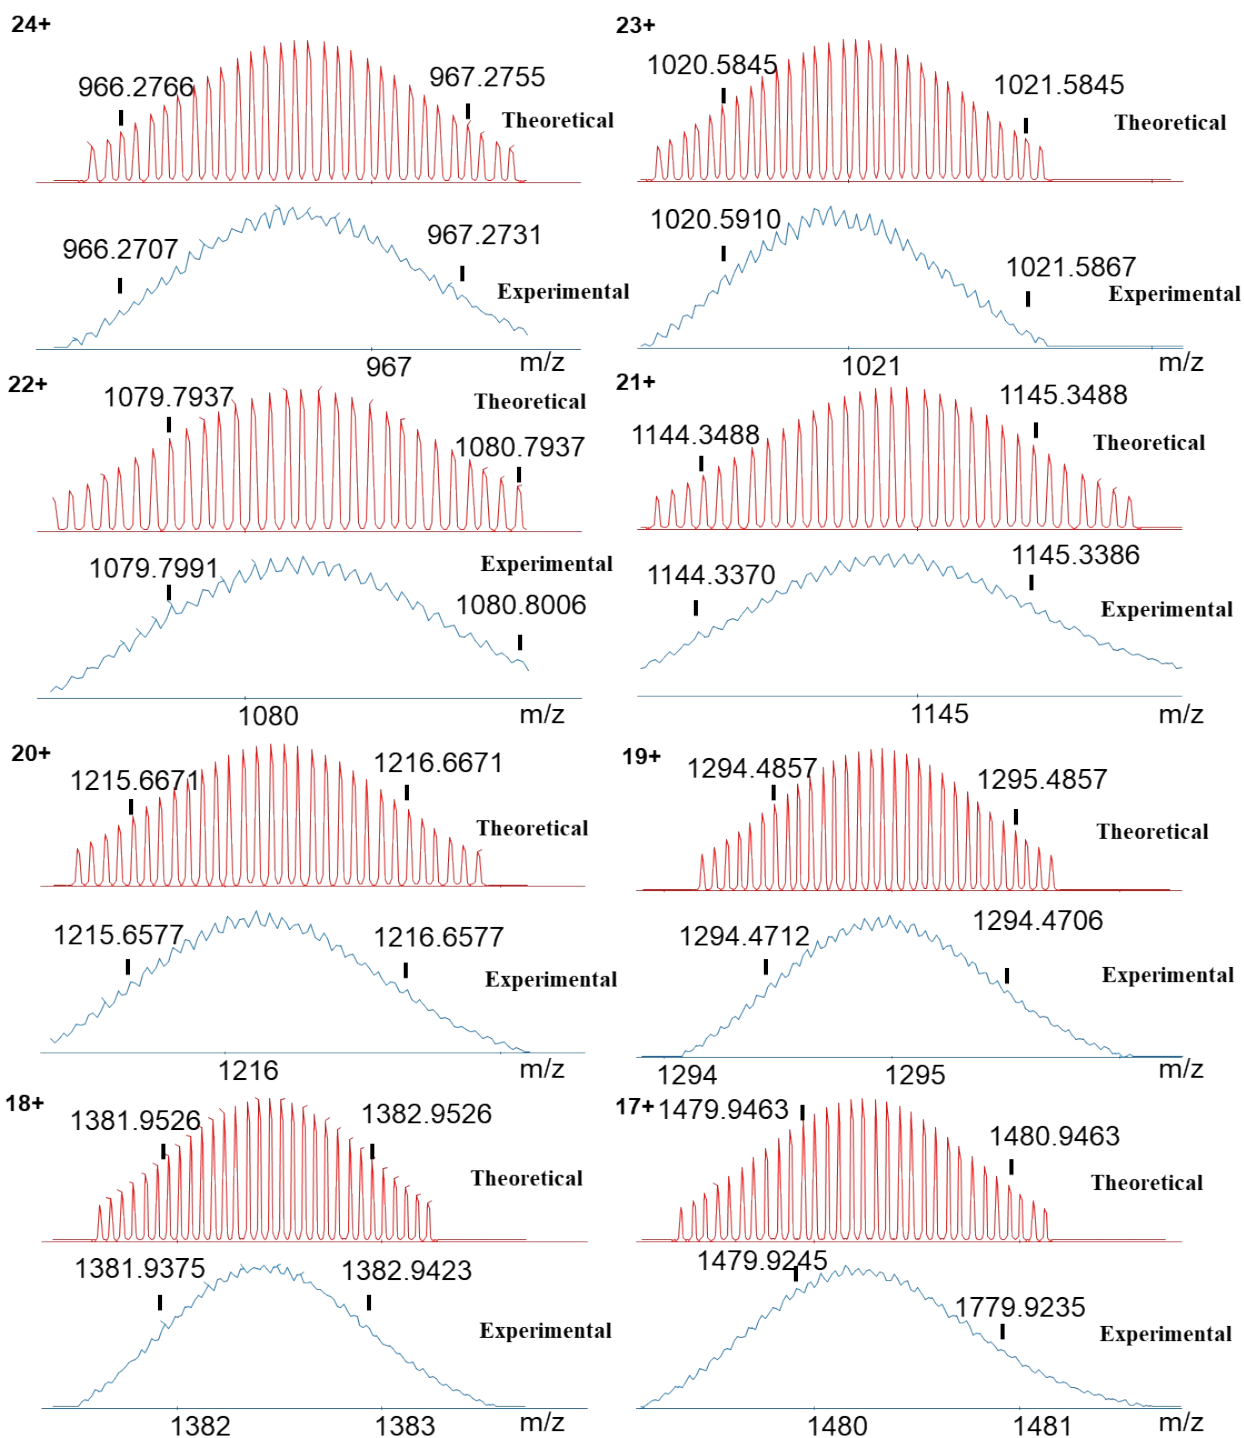

**Figure S22:** Theoretical (top) and experimental (bottom) isotope patterns for the different charge states observed from  $[\text{Fe}_{12}\text{LC}_6]\text{-}48(\text{NTf}_2^-)$ .

## 6. $^1\text{H}$ NMR, $^{13}\text{C}$ NMR, COSY and NOESY spectra of other compounds

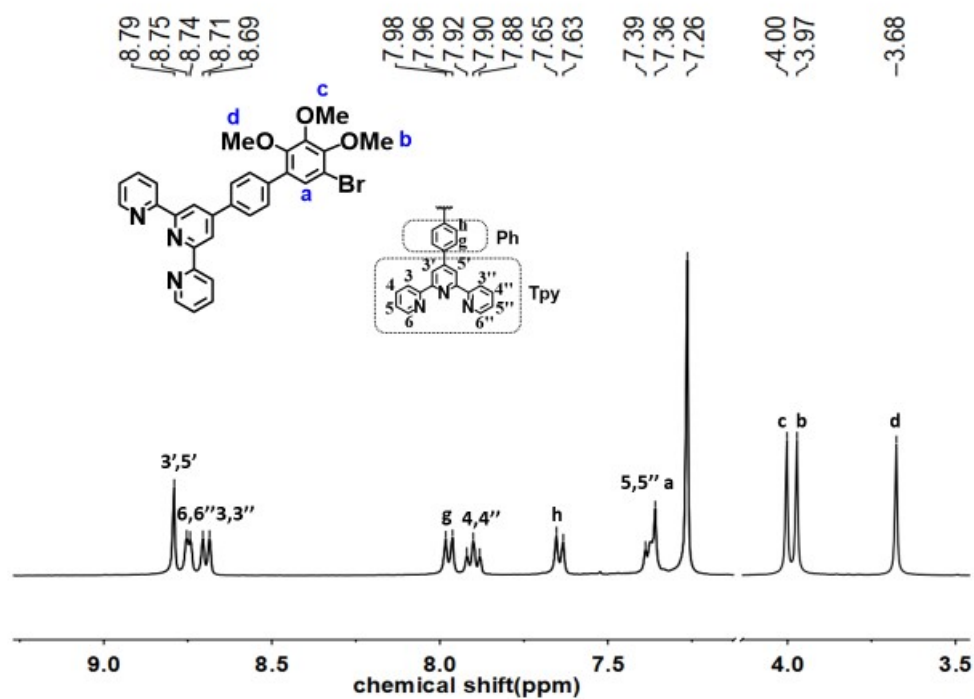

Figure S23:  $^1\text{H}$  NMR spectrum (500 MHz) of **S2** in  $\text{CDCl}_3$

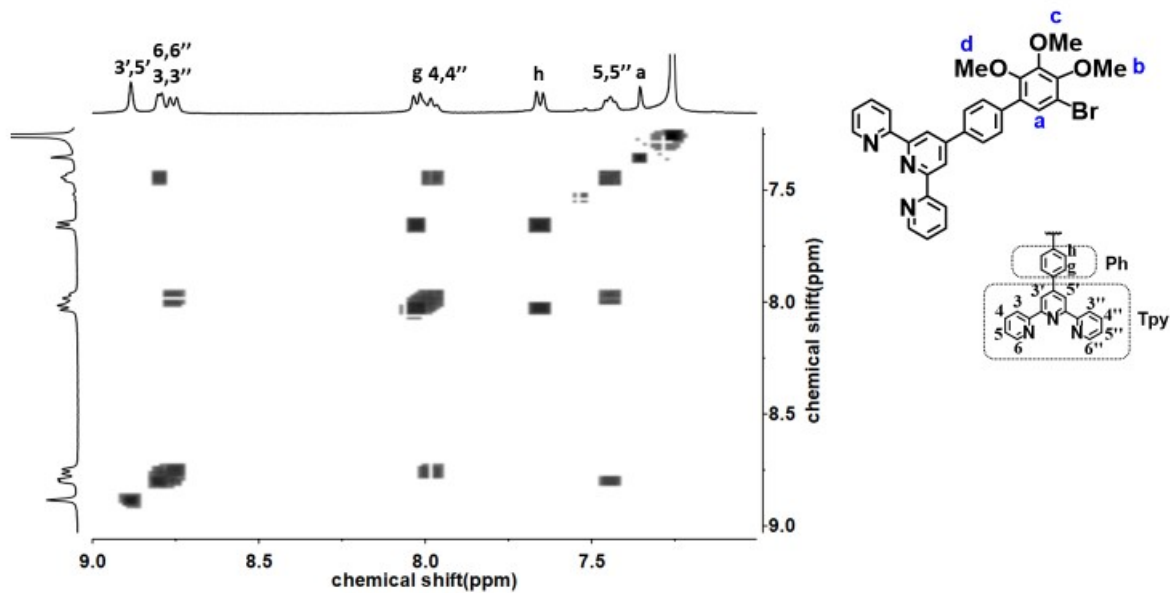

Figure S24: 2D COSY spectrum (500 MHz) of **S2** in  $\text{CDCl}_3$ .



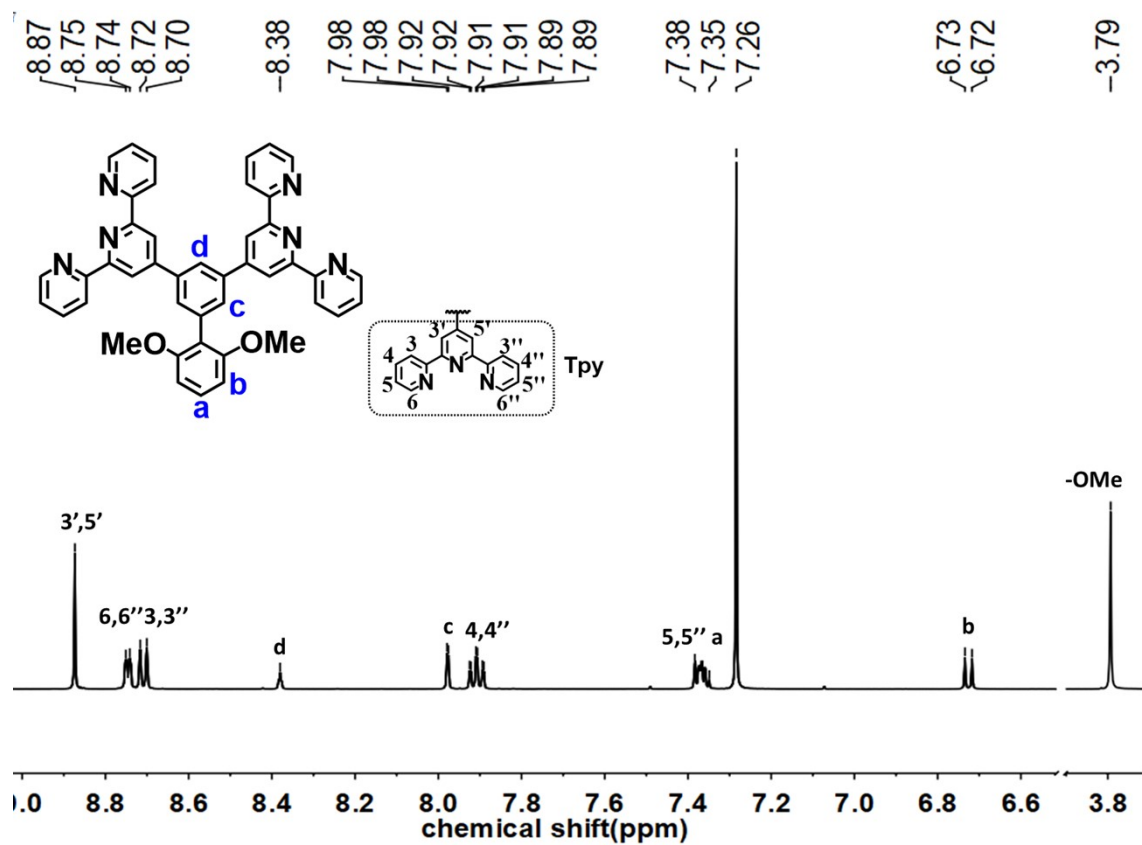

Figure S27:  $^1\text{H}$  NMR spectrum (400 MHz) of **S6** in  $\text{CDCl}_3$

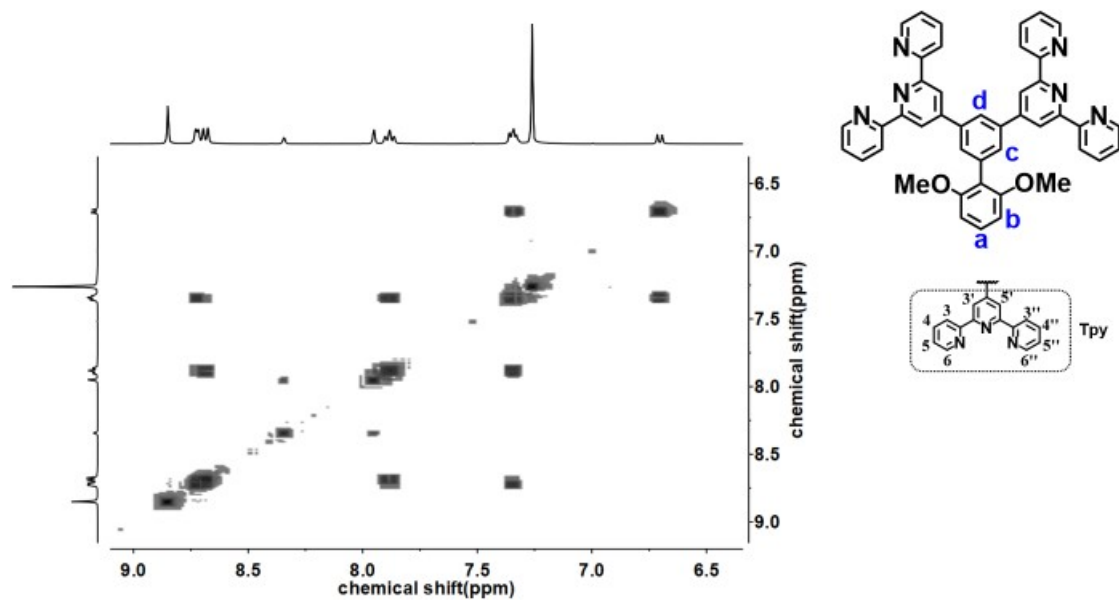

Figure S28: 2D COSY spectrum (400 MHz) of **S6** in  $\text{CDCl}_3$ .

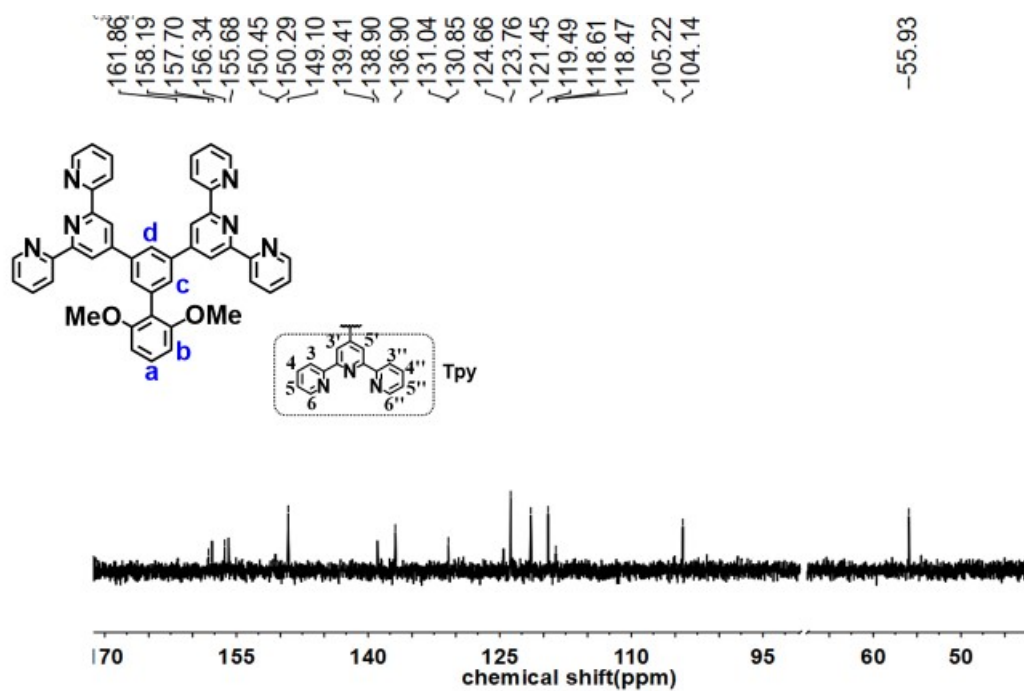

Figure S29:  $^{13}\text{C}$  NMR spectrum (100 MHz) of S6 in  $\text{CDCl}_3$ .

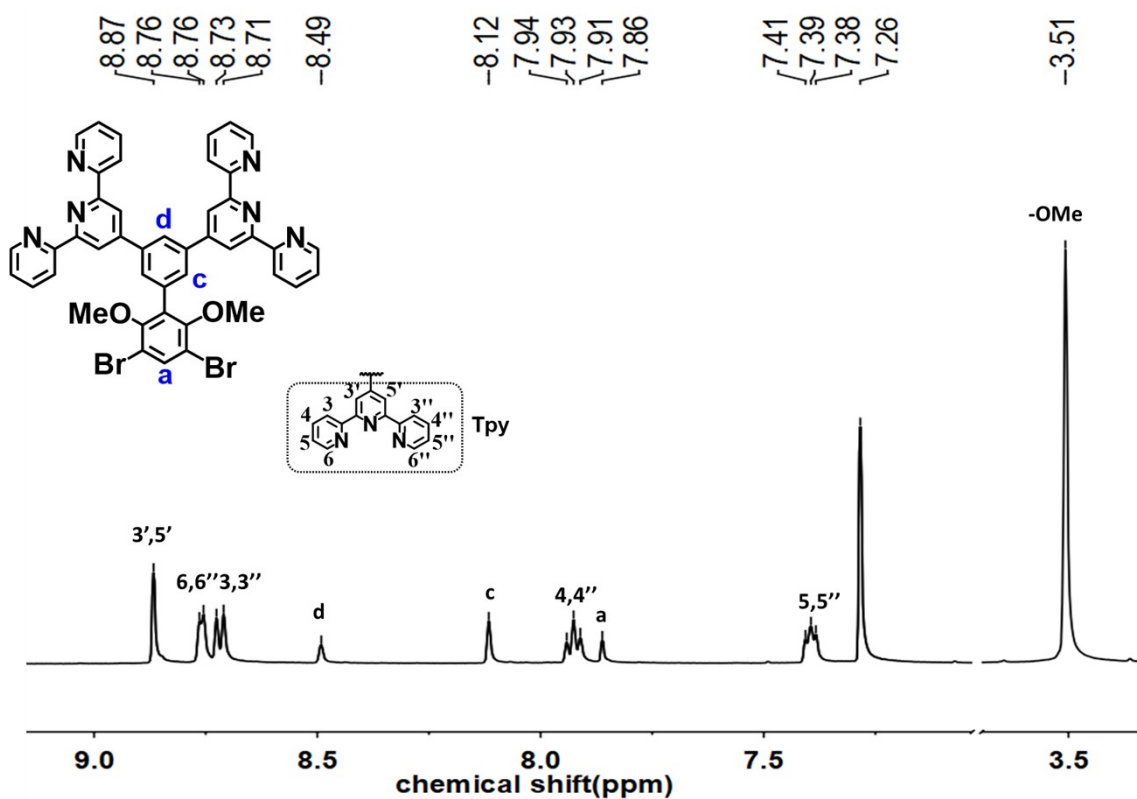

Figure S30:  $^1\text{H}$  NMR spectrum (400 MHz) of S7 in  $\text{CDCl}_3$ .



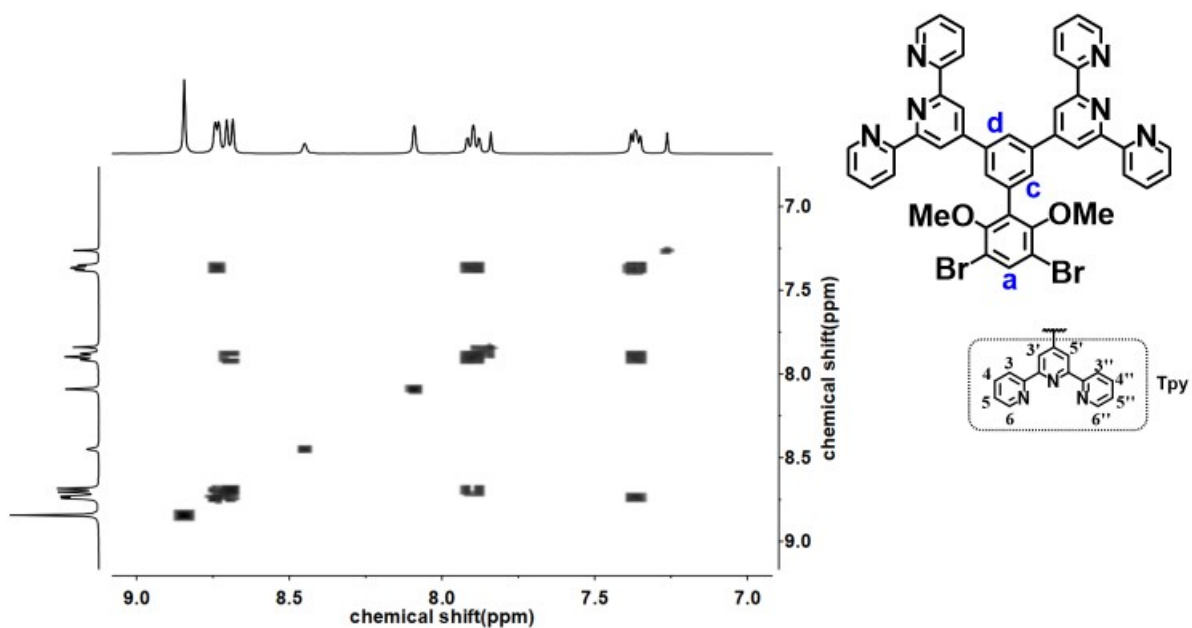

Figure S31: 2D COSY spectrum (400 MHz) of S7 in CDCl<sub>3</sub>.

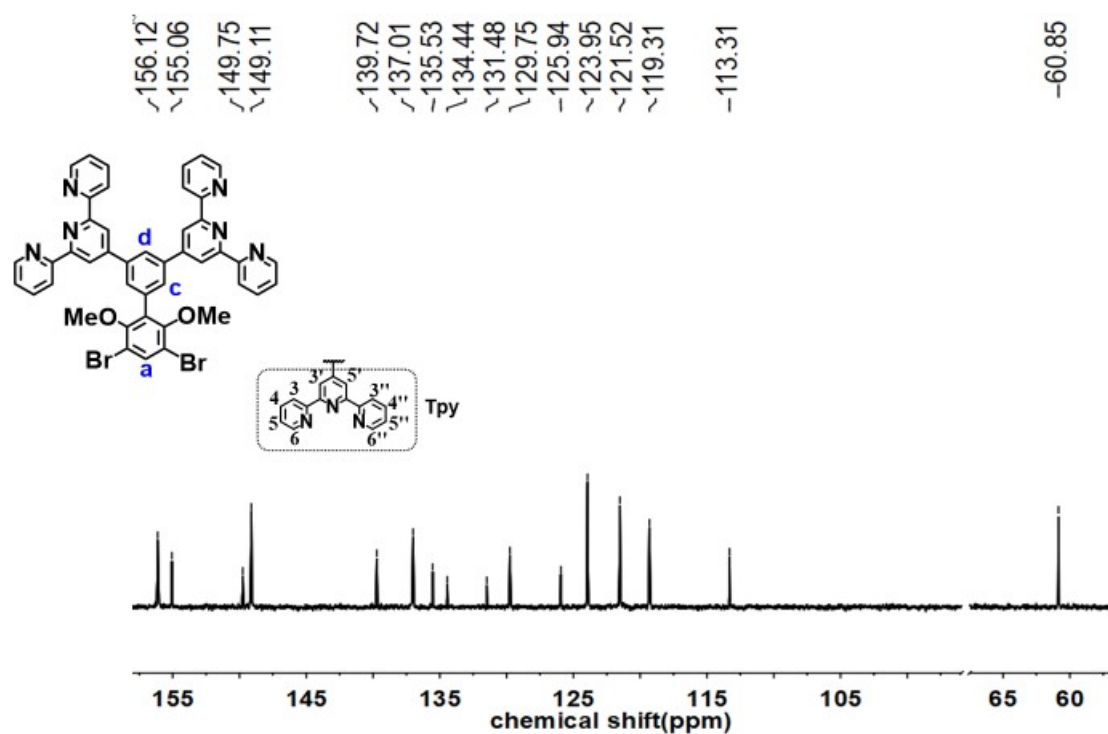

Figure S32: <sup>13</sup>C NMR spectrum (100 MHz) of S7 in CDCl<sub>3</sub>.



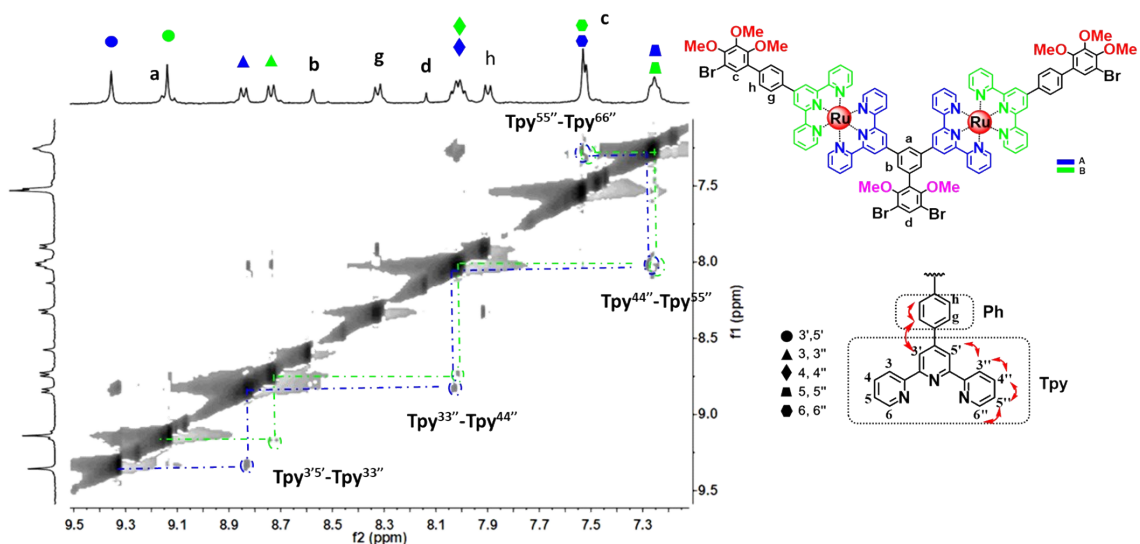

Figure S35: 2D NOESY spectrum (400 MHz) of **S9** in  $\text{CD}_3\text{CN}$ .

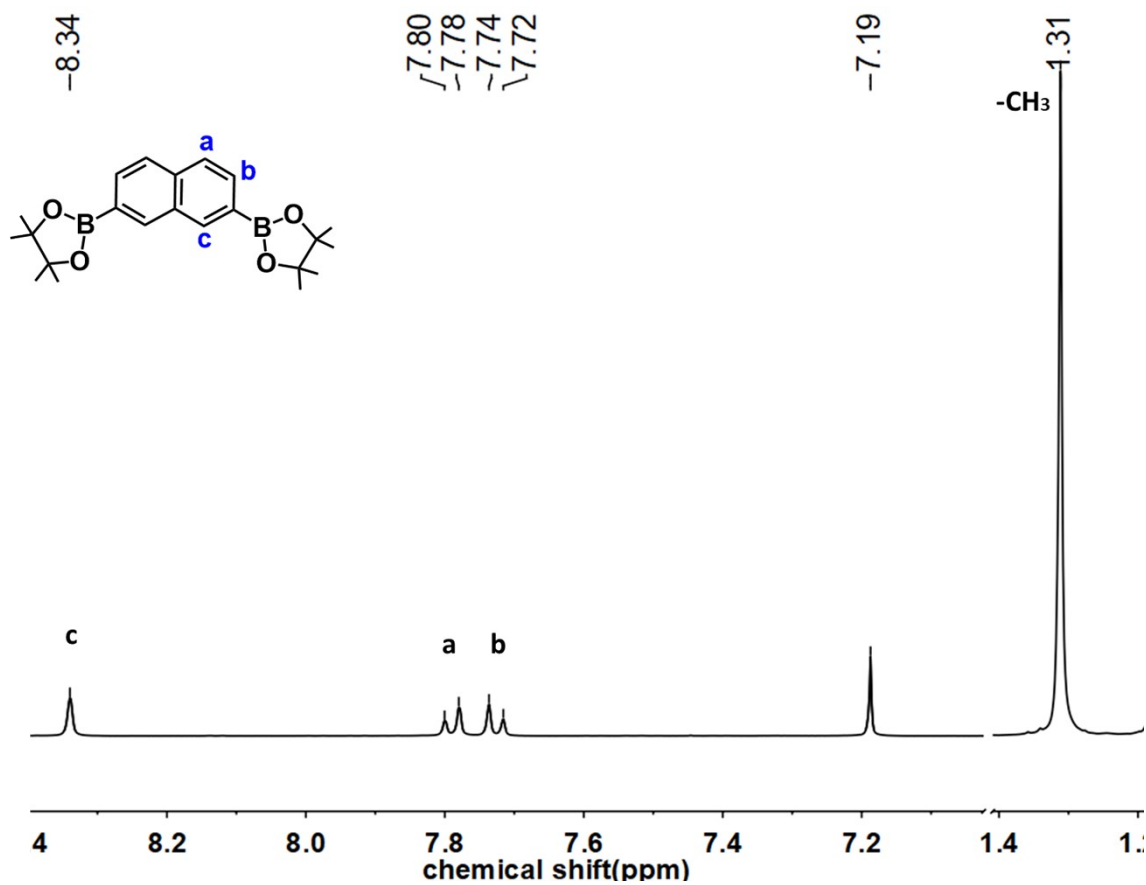

Figure S36:  $^1\text{H}$  NMR spectrum (500 MHz) of **S11** in  $\text{CDCl}_3$ .

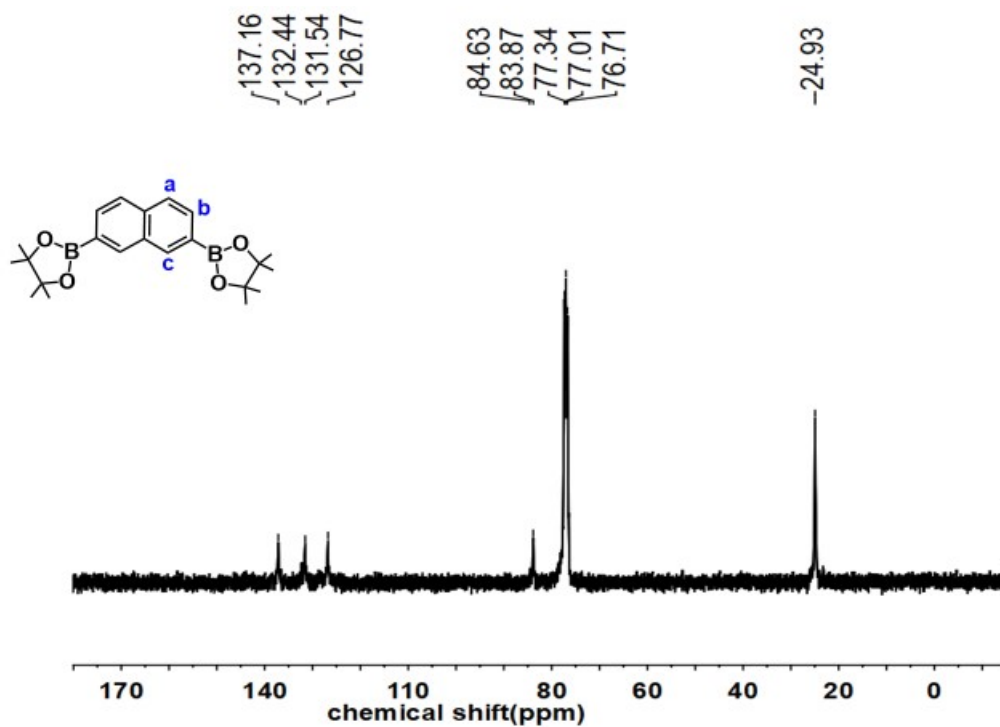

Figure S37: <sup>13</sup>C NMR spectrum (125 MHz) of S11 in CDCl<sub>3</sub>.

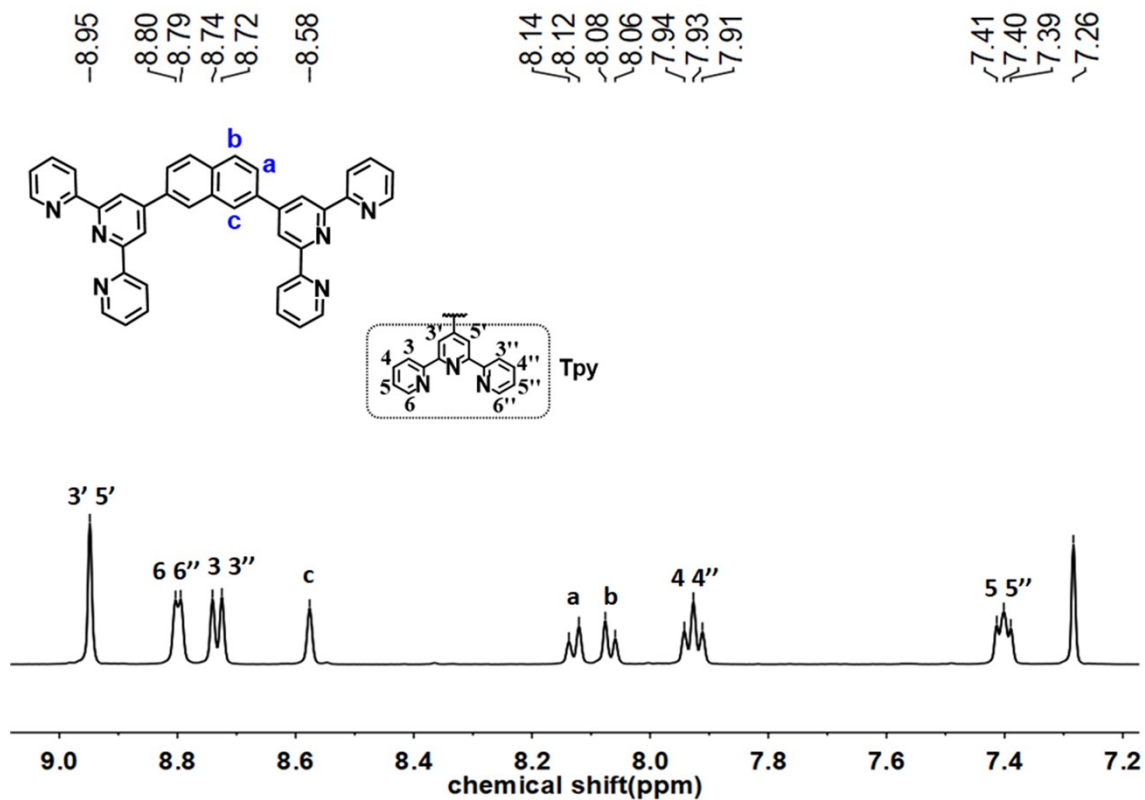

Figure S38: <sup>1</sup>H NMR spectrum (500 MHz) of S13 in CDCl<sub>3</sub>.

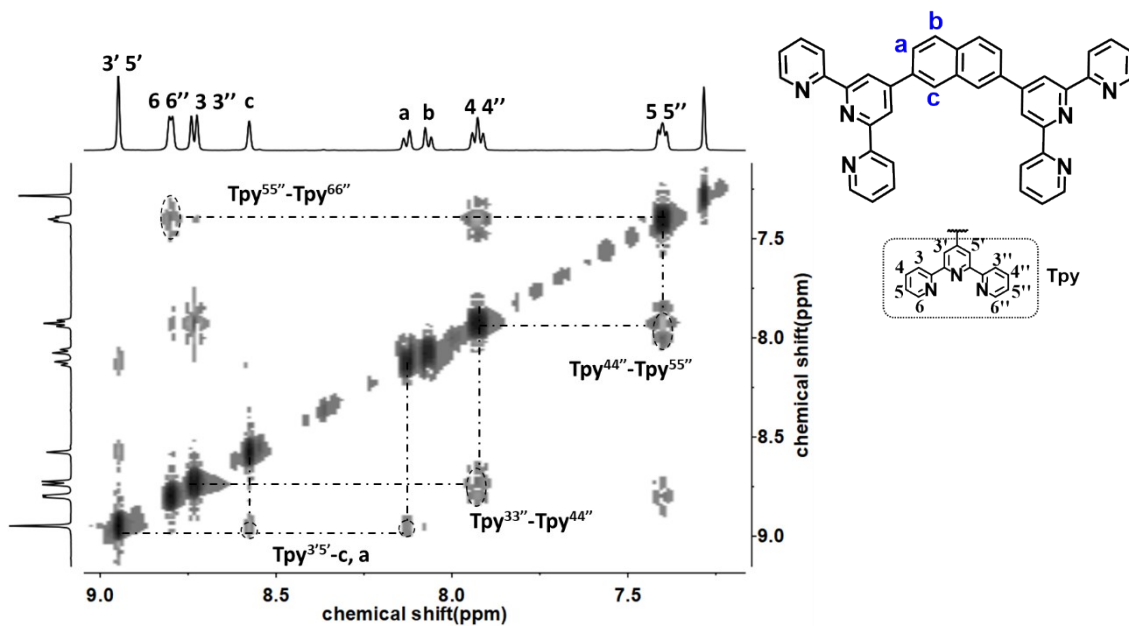

Figure S39: 2D NOESY spectrum (500 MHz) of S13 in CDCl<sub>3</sub>.

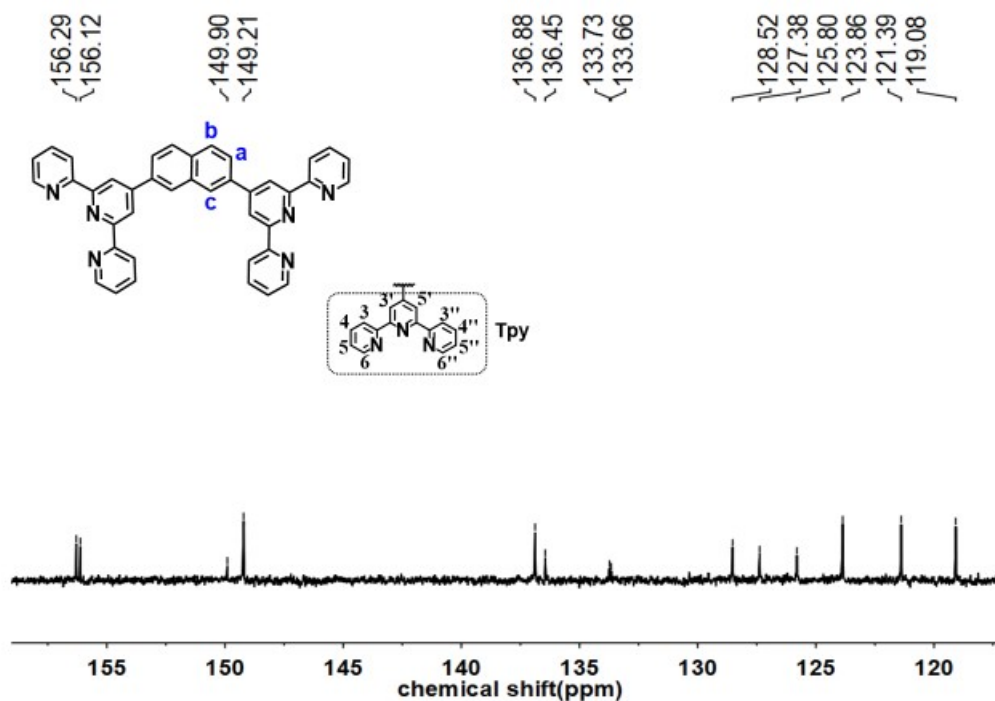

Figure S40: <sup>13</sup>C NMR spectrum (125 MHz) of S13 in CDCl<sub>3</sub>.

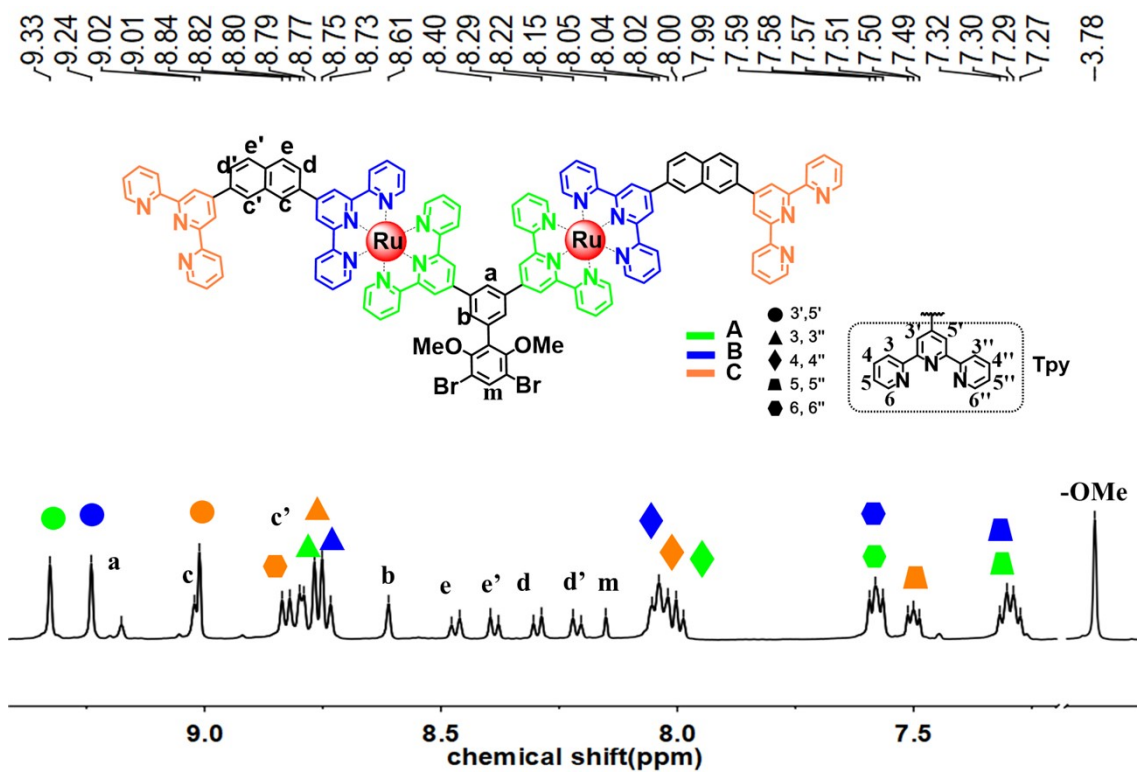

Figure S41:  $^1\text{H}$  NMR spectrum (400 MHz) of S15 in  $\text{CD}_3\text{CN}$ .

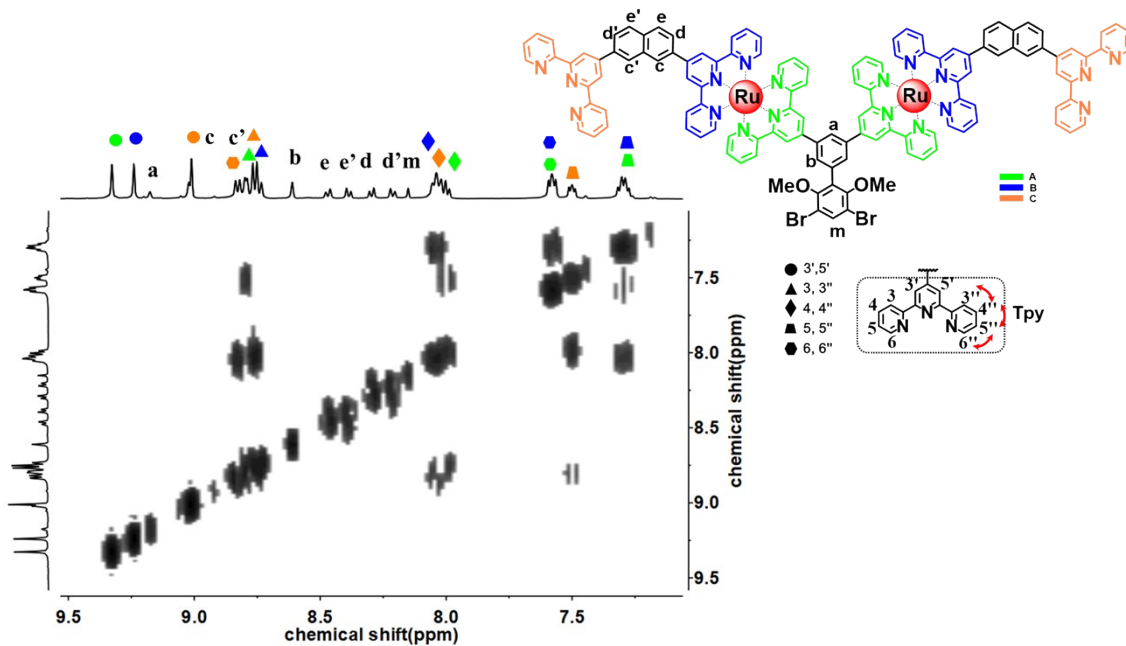

Figure S42: 2D COSY spectrum (500 MHz) of S15 in  $\text{CD}_3\text{CN}$ .

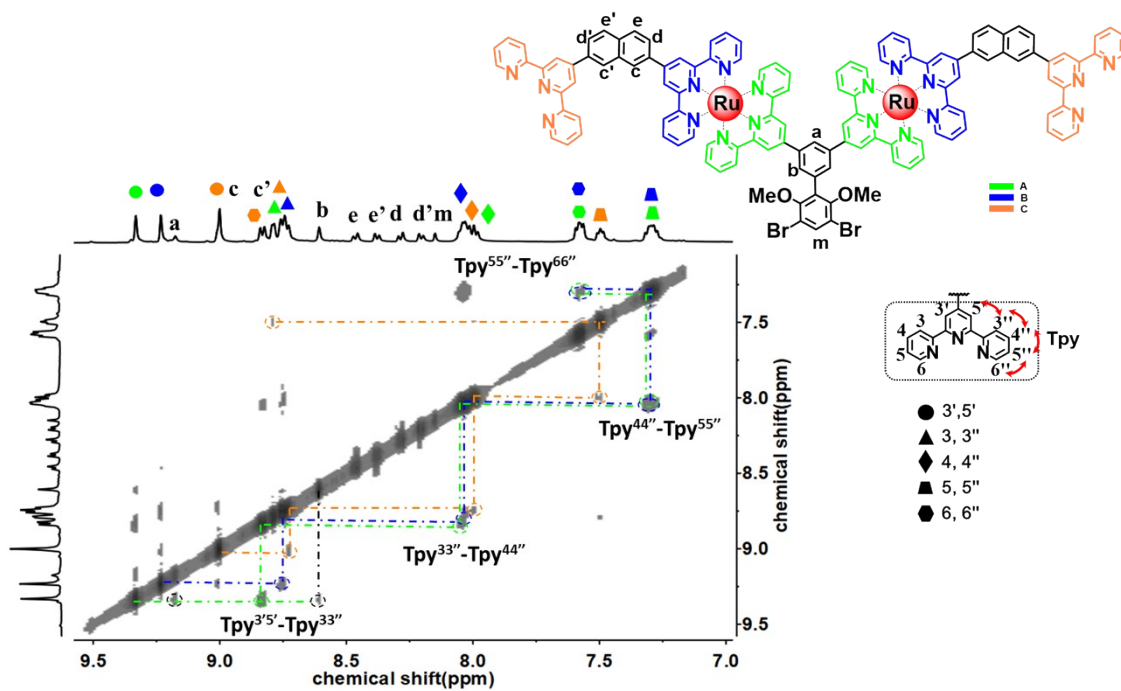

Figure S43: 2D NOESY spectrum (400 MHz) of S15 in CD<sub>3</sub>CN .

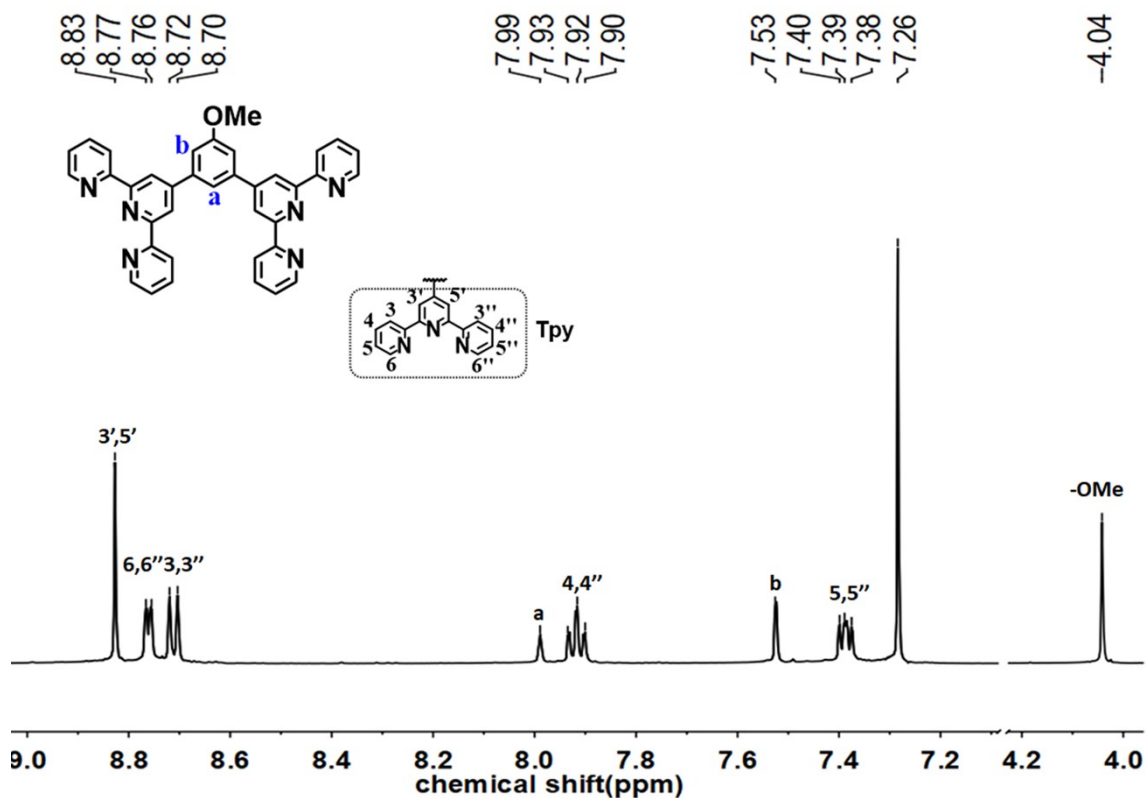

Figure S44: <sup>1</sup>H NMR spectrum (400 MHz) of S17 in CDCl<sub>3</sub>

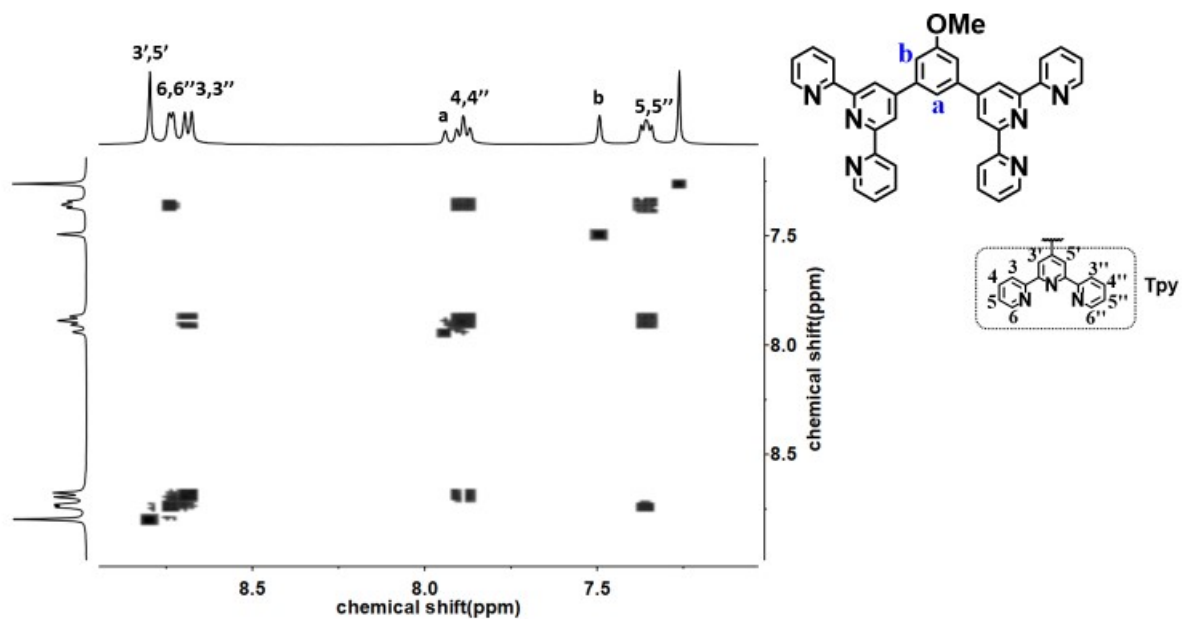

Figure S45: 2D COSY spectrum (400 MHz) of S17 in CDCl<sub>3</sub>.

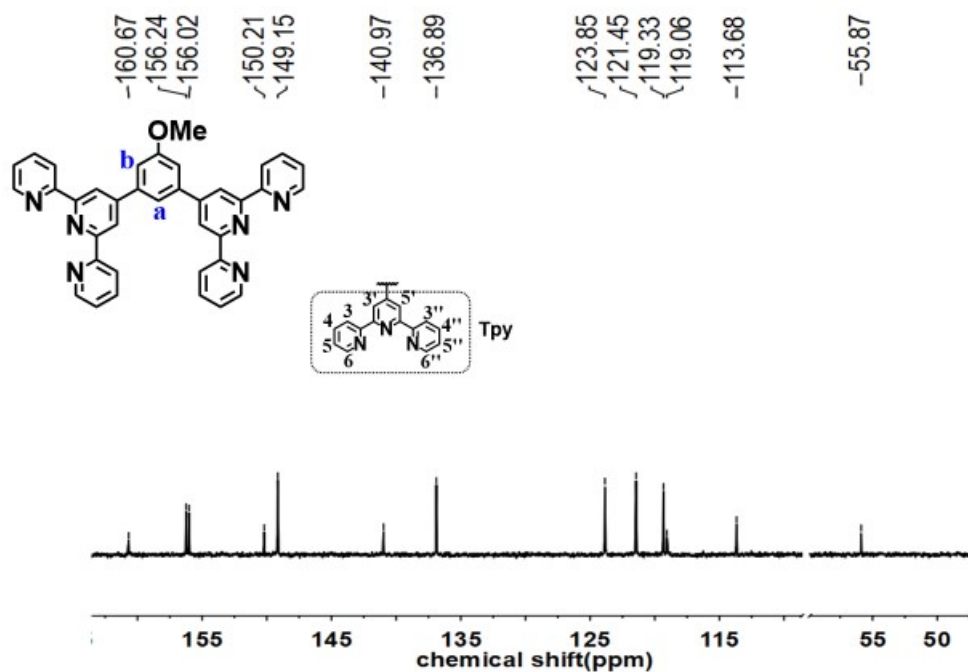

Figure S46: <sup>13</sup>C NMR spectrum (400 MHz) of S17 in CDCl<sub>3</sub>.





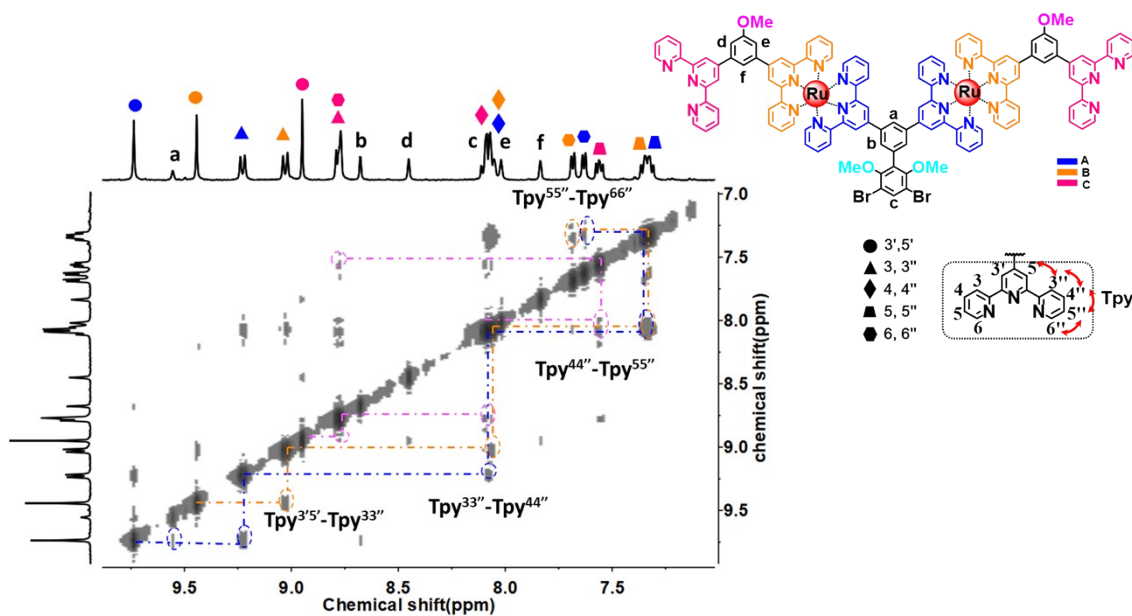

Figure S49: 2D NOESY spectrum (400 MHz) of S18 in CD<sub>3</sub>CN .

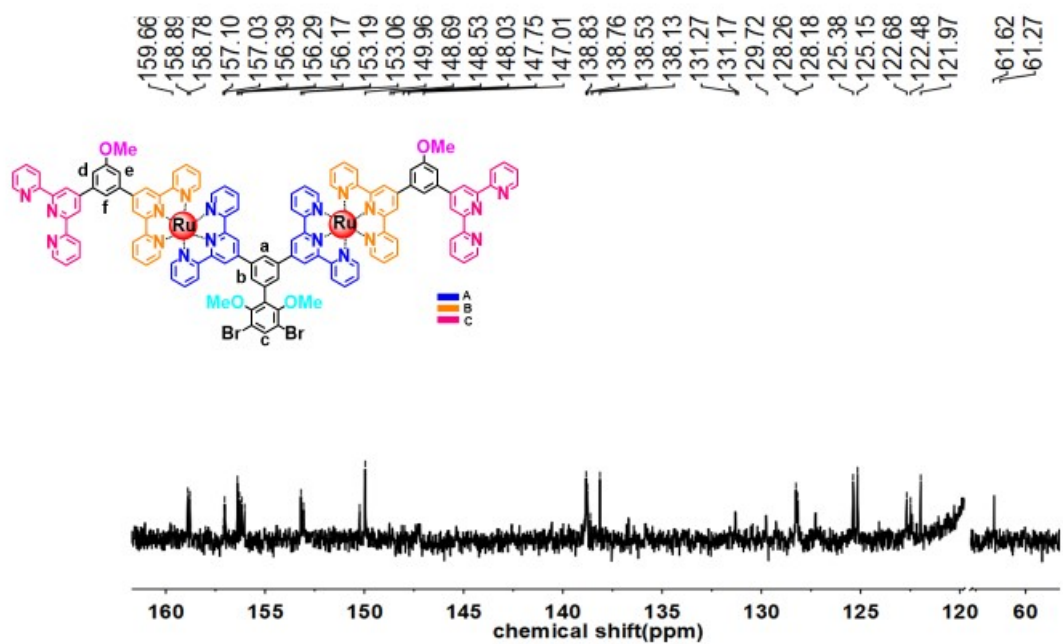

Figure S50: <sup>13</sup>C NMR spectrum (125 MHz) of S18 in CD<sub>3</sub>CN.

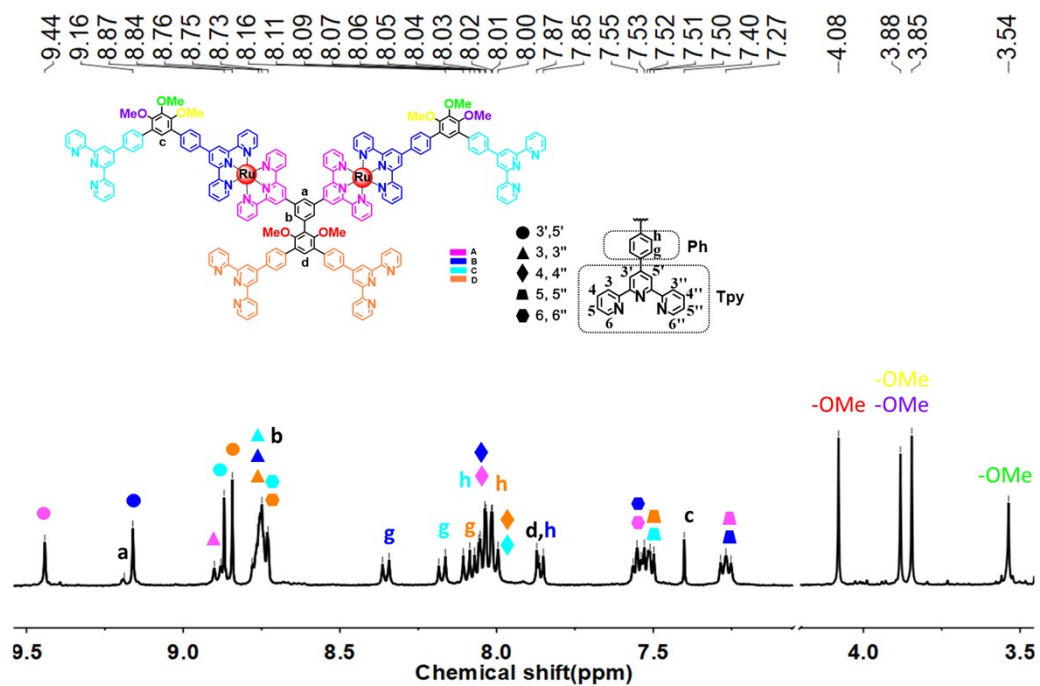

Figure S51:  $^1\text{H}$  NMR spectrum (500 MHz) of LA in  $\text{CD}_3\text{CN}$ .

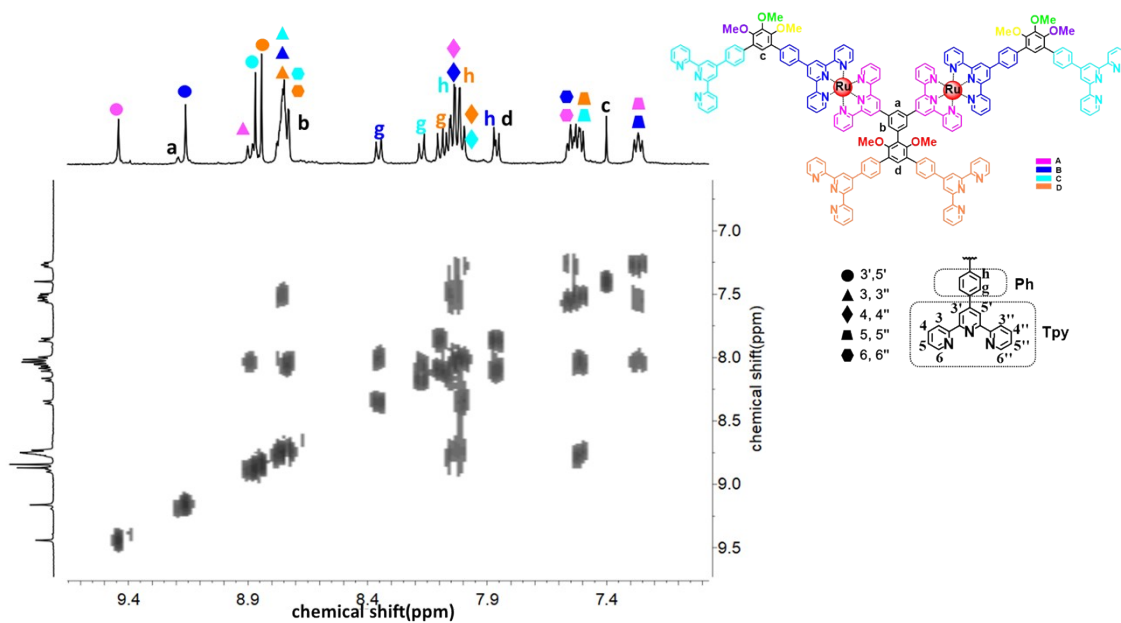

Figure S52: 2D COSY spectrum (400 MHz) of LA in  $\text{CD}_3\text{CN}$ .

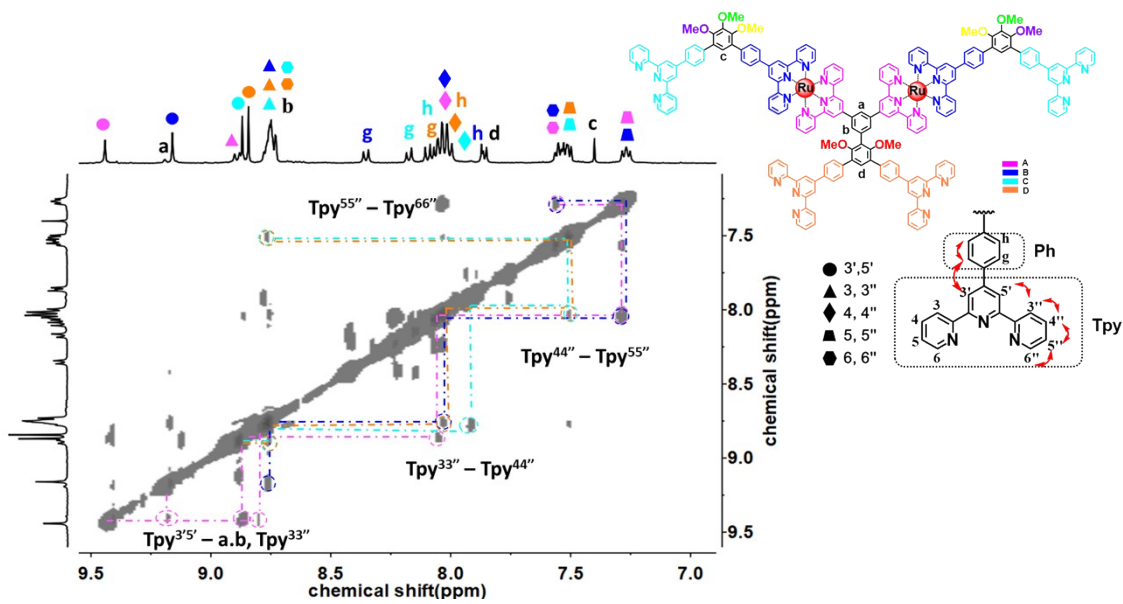

Figure S53: 2D NOESY spectrum (500 MHz) of LA in CD<sub>3</sub>CN.

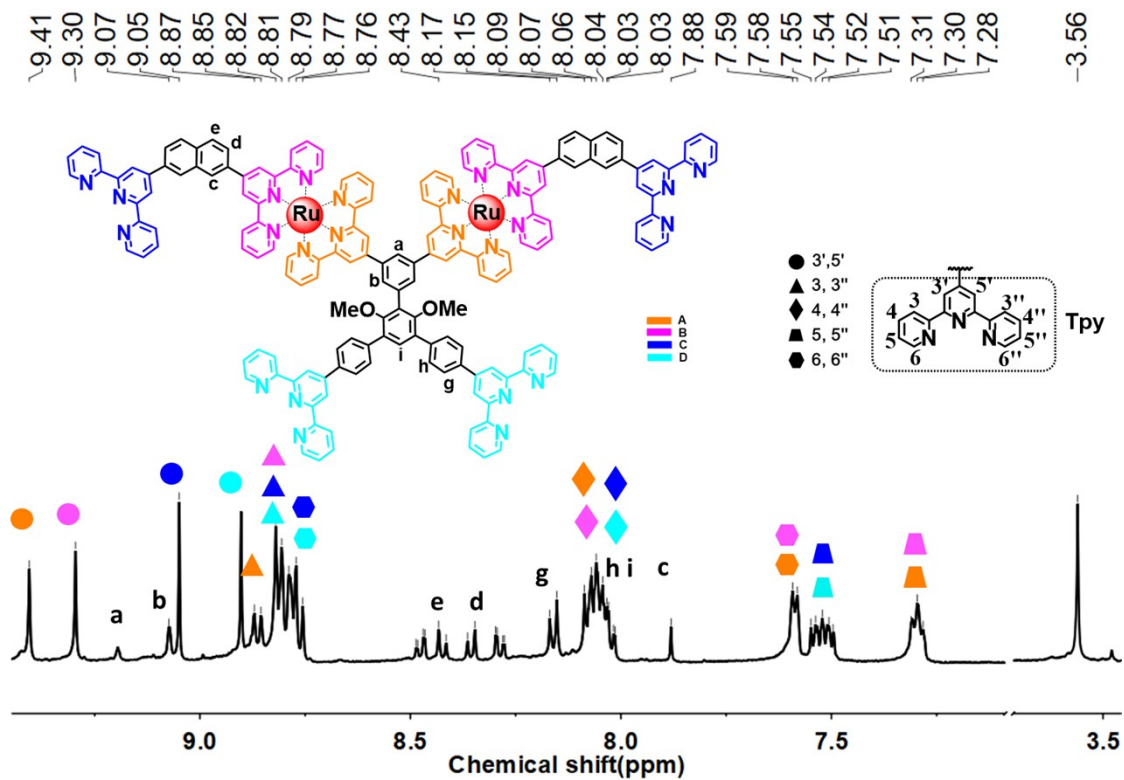

Figure S54: <sup>1</sup>H NMR spectrum (500 MHz) of LB in CD<sub>3</sub>CN.

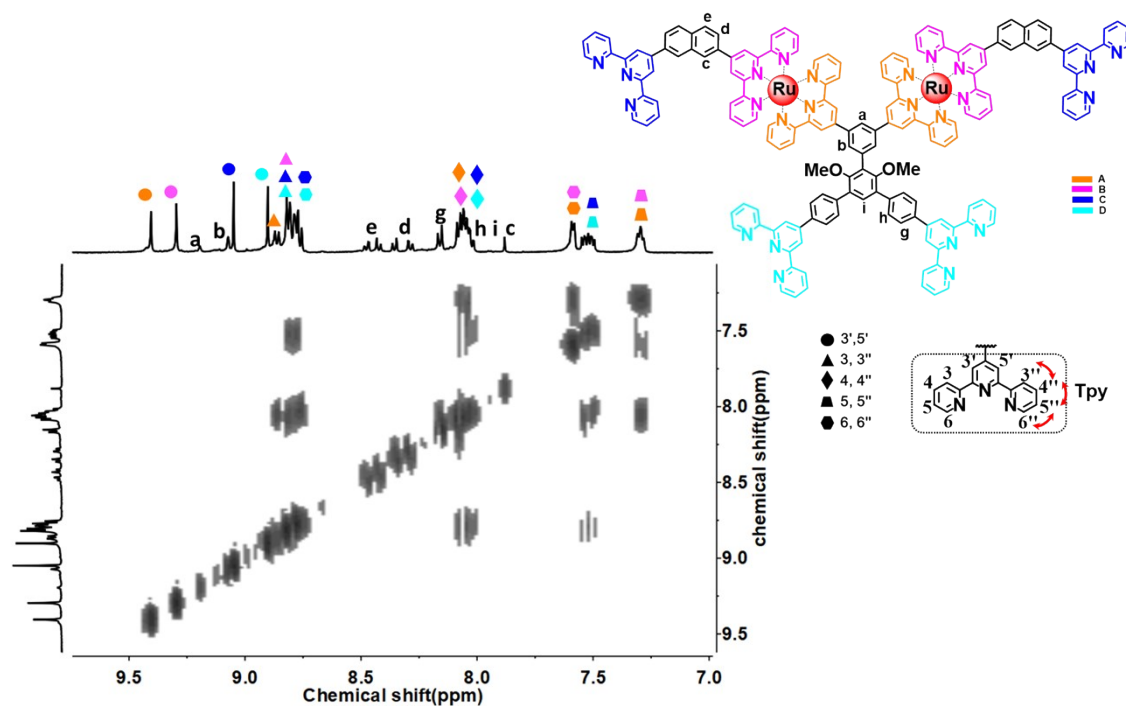

Figure S55: 2D COSY spectrum (400 MHz) of **LB** in  $CD_3CN$ .

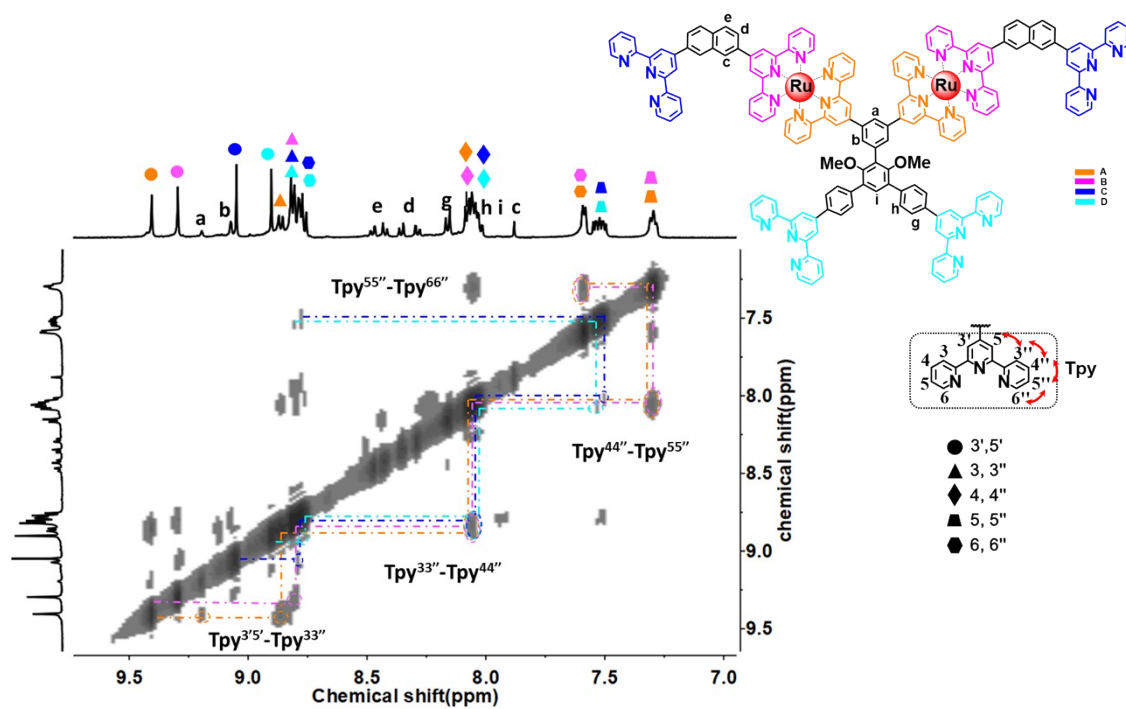

Figure S56: 2D NOESY spectrum (400 MHz) of **LB** in  $CD_3CN$ .

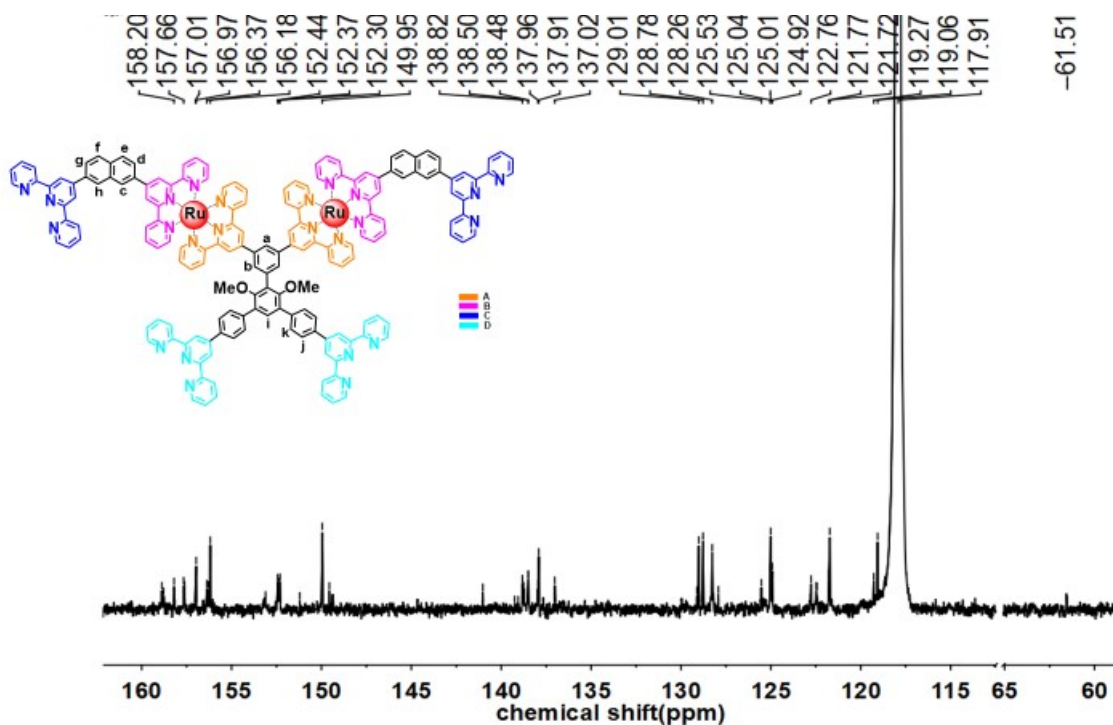

Figure S57:  $^{13}\text{C}$  NMR spectrum (125 MHz) of LB in  $\text{CD}_3\text{CN}$ .

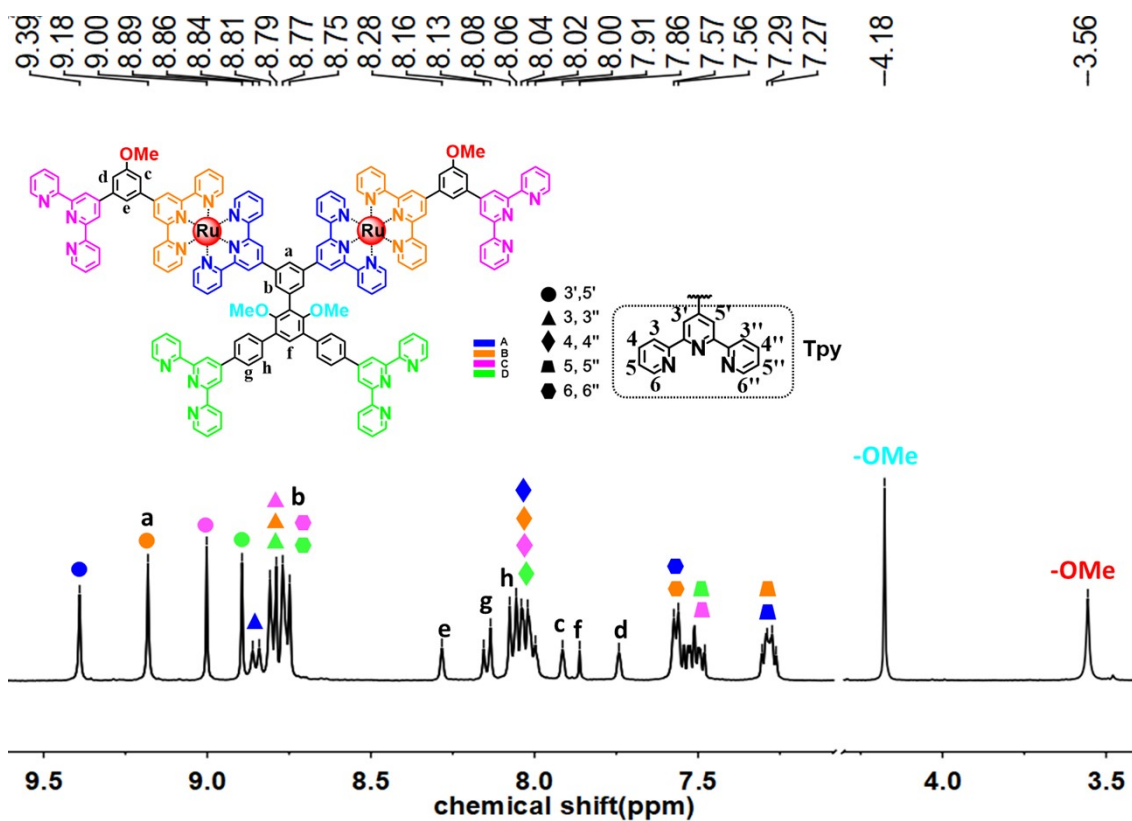

Figure S58:  $^1\text{H}$  NMR spectrum (400 MHz) of LC in  $\text{CD}_3\text{CN}$ .

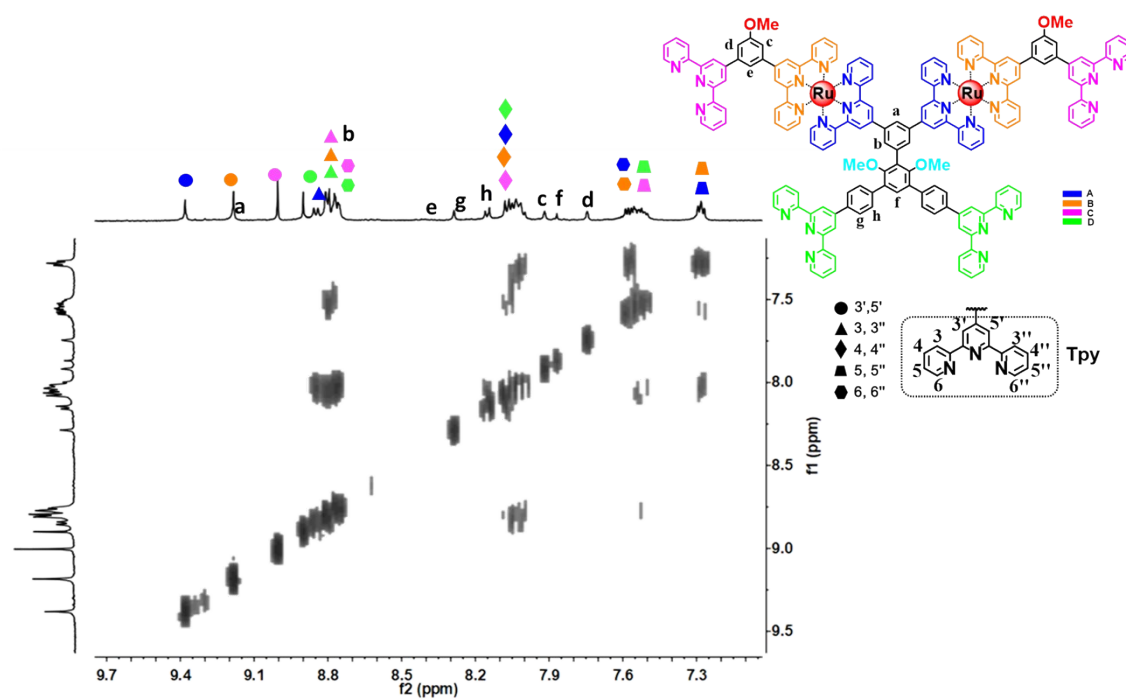

Figure S59: 2D COSY spectrum (400 MHz) of LC in CD<sub>3</sub>CN.

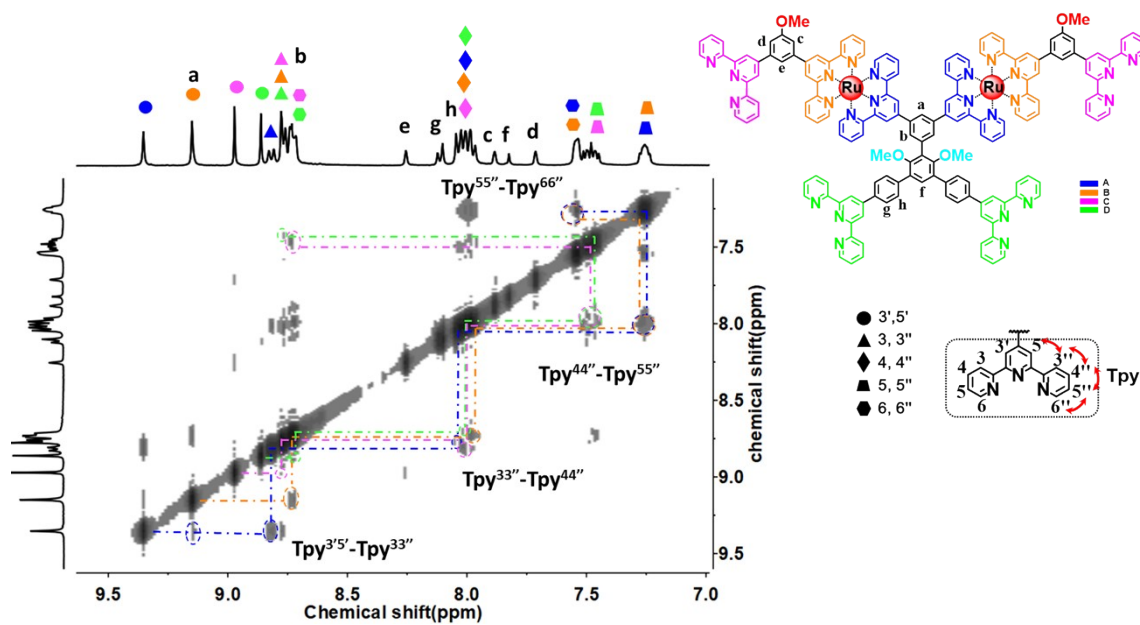

Figure S60: 2D NOESY spectrum (400 MHz) of LC in CD<sub>3</sub>CN .

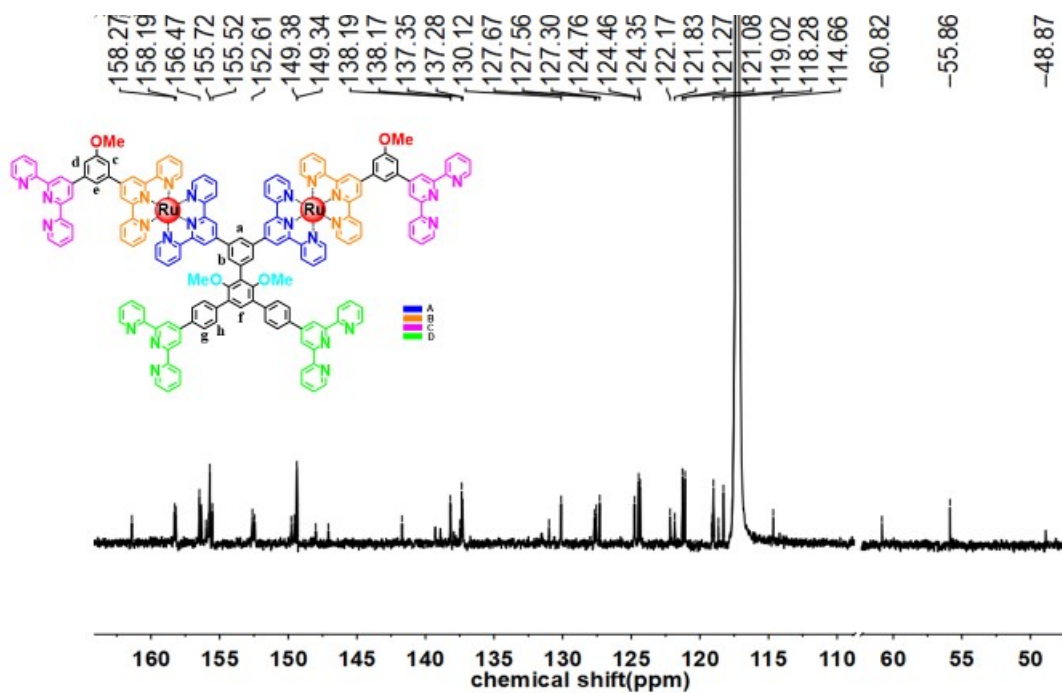

Figure S61:  $^{13}\text{C}$  NMR spectrum (400 MHz) of LC in  $\text{CD}_3\text{CN}$ .

## 7. ESI-MS spectra data of ligands and complexes

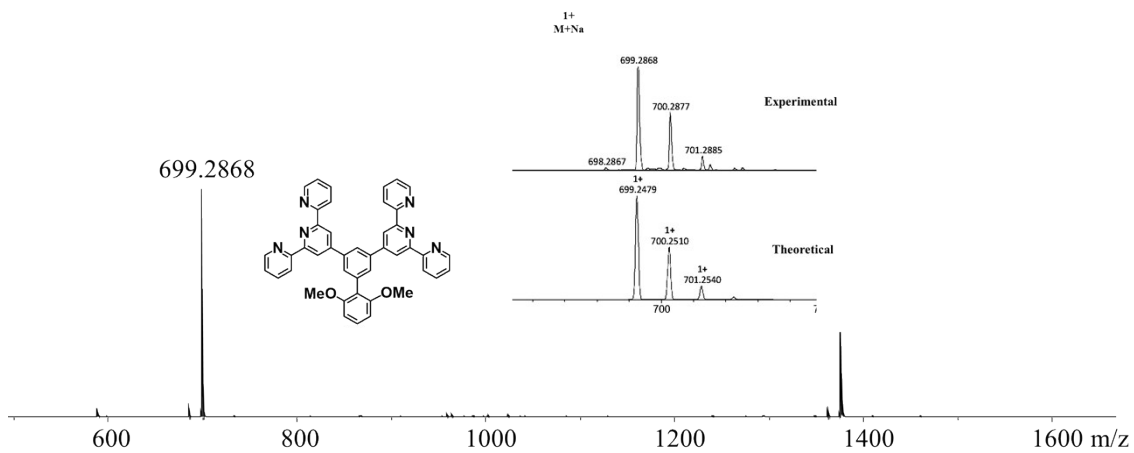

Figure S62: Isotope patterns and ESI-MS spectrum of S6.



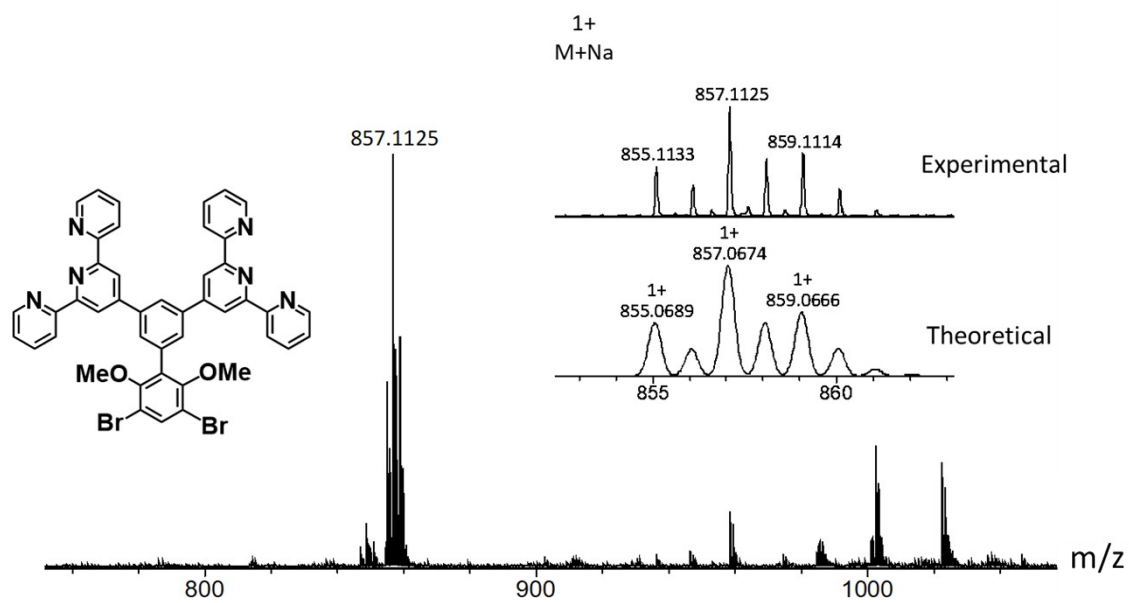

Figure S63: Isotope patterns and ESI-MS spectrum of S7.

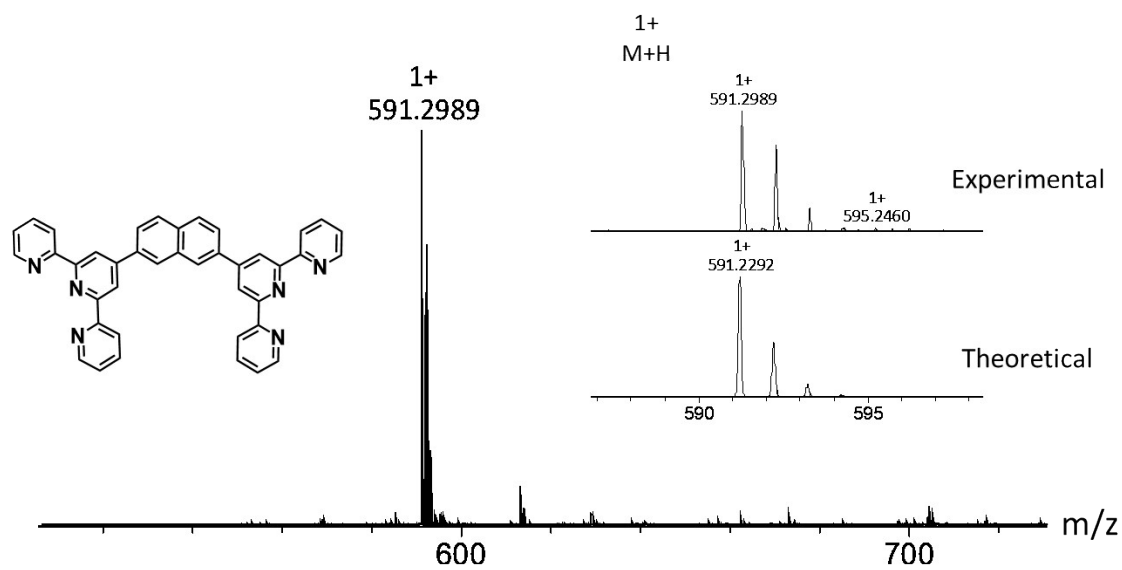

Figure S64: Isotope patterns and ESI-MS spectrum of S13

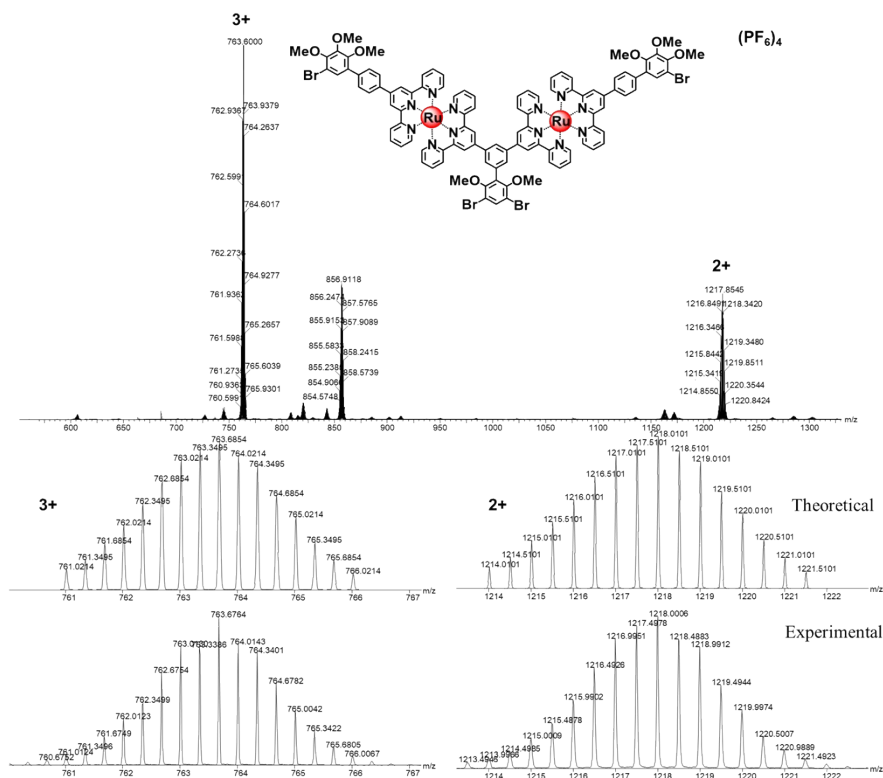

Figure S65: Isotope patterns and ESI-MS spectrum of S9.

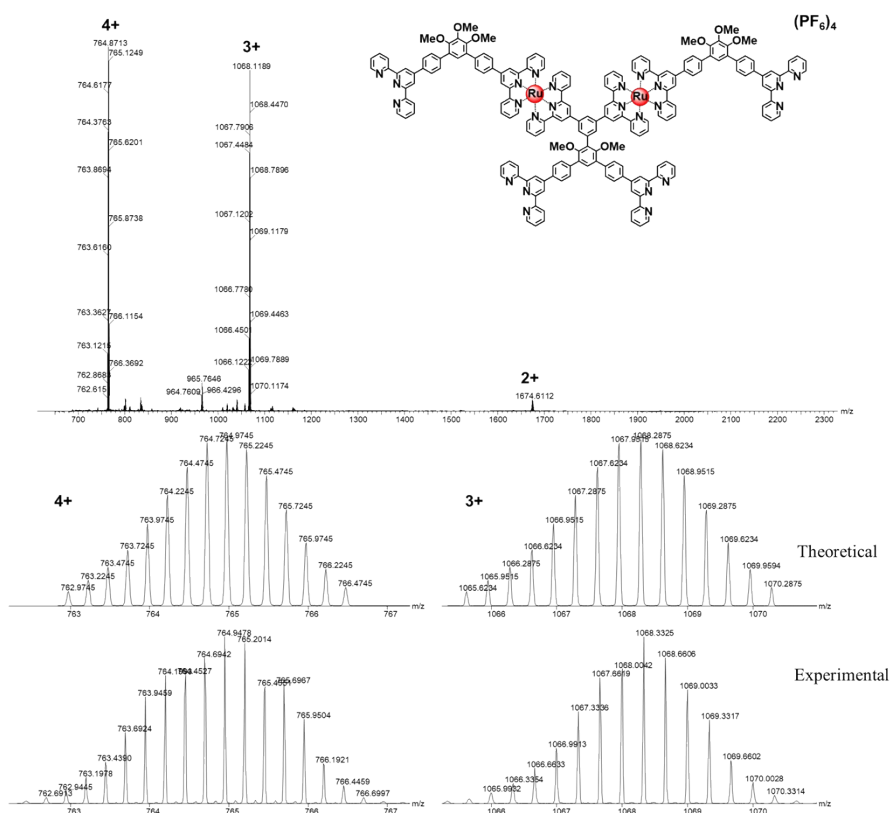

Figure S66: Isotope patterns and ESI-MS spectrum of LA.

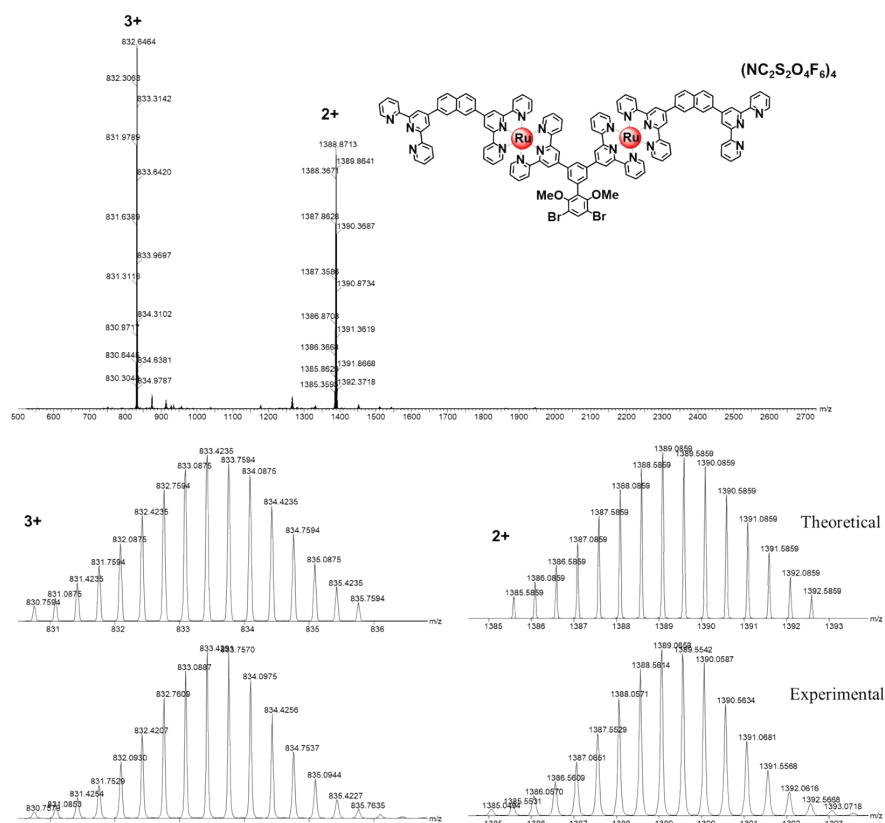

Figure S67: Isotope patterns and ESI-MS spectrum of S15.

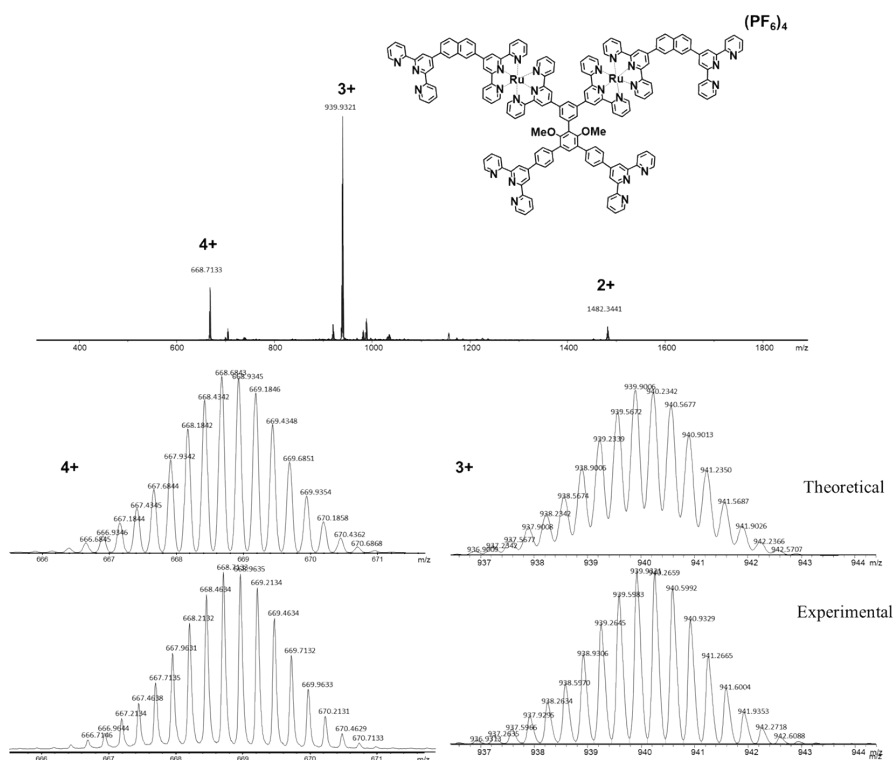

Figure S68: Isotope patterns and ESI-MS spectrum of LB.

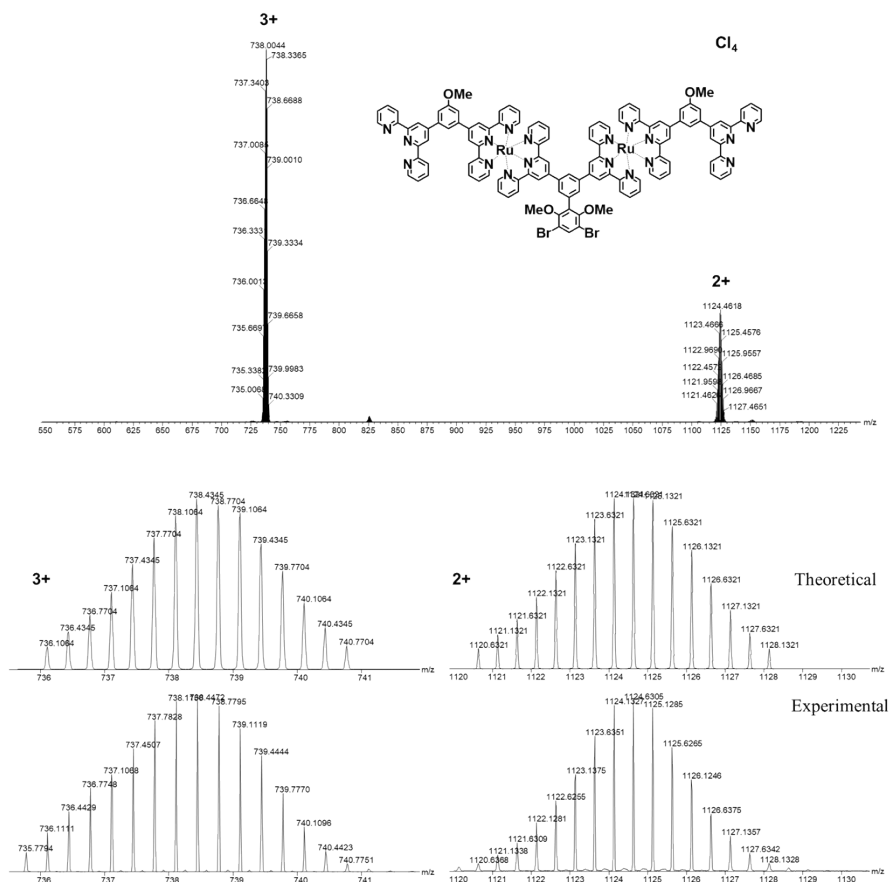

Figure S69: Isotope patterns and ESI-MS spectrum of S18.

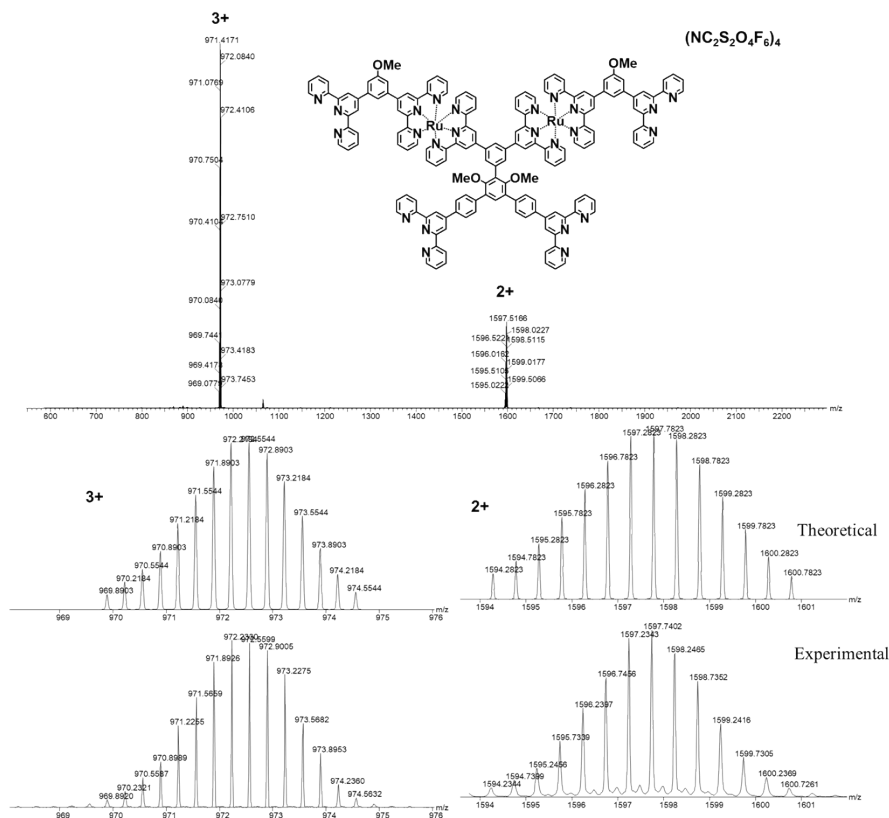

Figure S70: Isotope patterns and ESI-MS spectrum of LC.

## 8. References

- S1. J. L. Wang, X. Li, X. Lu, I. F. Hsieh, Y. Cao, C. N. Moorefield, C. Wesdemiotis, S. Z. Cheng and G. R. Newkome, *J. Am. Chem. Soc.*, 2011, **133**, 11450-11453
- S2. M. Chen, J. Wang, S.-C. Wang, Z. Jiang, D. Liu, Q. Liu, H. Zhao, J. Yan, Y.-T. Chan and P. Wang, *J. Am. Chem. Soc.*, 2018, **140**, 12168-12174.
